# Supplementary material for: Hippocampal dentate gyri proteomics reveals Wnt signaling involvement in the behavioral impairment in the THRSP-overexpressing ADHD mouse model
Source: PubMed Central journal article supplement (PMC9842619; doi:10.1038/s42003-022-04387-5), 2023-01-16
Supplement: 42003_2022_4387_MOESM1_ESM.pdf [file 42003_2022_4387_MOESM1_ESM.pdf]

## **Hippocampal dentate gyri proteomics reveals Wnt signaling involvement in the behavioral impairment in the THRSP-overexpressing ADHD mouse model**

Raly James Perez Custodio <sup>1,2,3,‡</sup>, Hee Jin Kim <sup>2,‡</sup>, Jiyeon Kim <sup>4</sup>, Darlene Mae Ortiz <sup>2</sup>, Mikyung Kim <sup>2,5</sup>, Danilo Buctot <sup>2</sup>, Leandro Val Sayson <sup>2</sup>, Hyun Jun Lee <sup>2</sup>, Bung-Nyun Kim <sup>6</sup>  
Eugene C. Yi <sup>4,\*\*</sup>, and Jae Hoon Cheong <sup>3,\*</sup>

<sup>1</sup>*Department of Ergonomics, Leibniz Research Centre for Working Environment and Human Factors - IfADo, Ardeystr. 67, 44139 Dortmund, Germany*

<sup>2</sup>*Uimyung Research Institute for Neuroscience, Department of Pharmacy, Sahmyook University, 815 Hwarangro, Nowon-gu, Seoul 01795, Republic of Korea*

<sup>3</sup>*Institute for New Drug Development, College of Pharmacy, Jeonbuk National University, 567 Baekje-daero, Deokjin-gu, Jeonju-si, Jeollabuk-do 54896, Republic of Korea*

<sup>4</sup>*Department of Molecular Medicine and Biopharmaceutical Sciences, Graduate School of Convergence Science and Technology and College of Medicine, Seoul National University, Seoul 03080, Republic of Korea*

<sup>5</sup>*Department of Chemistry & Life Science, Sahmyook University, 815 Hwarangro, Nowon-gu, Seoul 01795, Republic of Korea*

<sup>6</sup>*Department of Psychiatry and Behavioral Science, College of Medicine, Seoul National University, 101 Daehakro, Jongno-gu, Seoul, 03080, Republic of Korea*

‡ Equal Contributions

\*Corresponding author: Jae Hoon Cheong (cheongjh@jbnu.ac.kr)

\*\*Co-corresponding author: Eugene C. Yi (euyi@snu.ac.kr)

# Supplementary figure 1: Original Western Blots

Figure 5b/Figure 6c

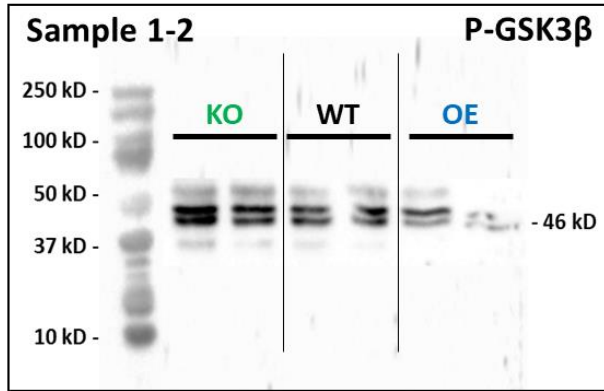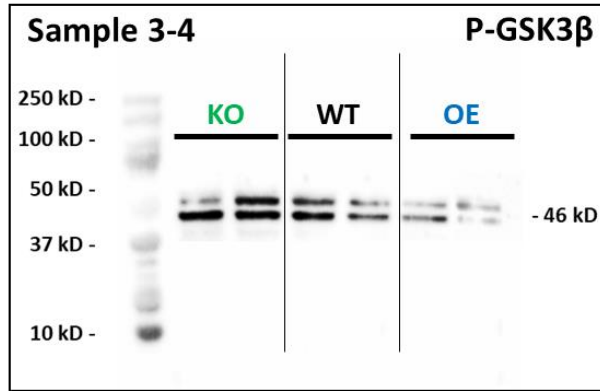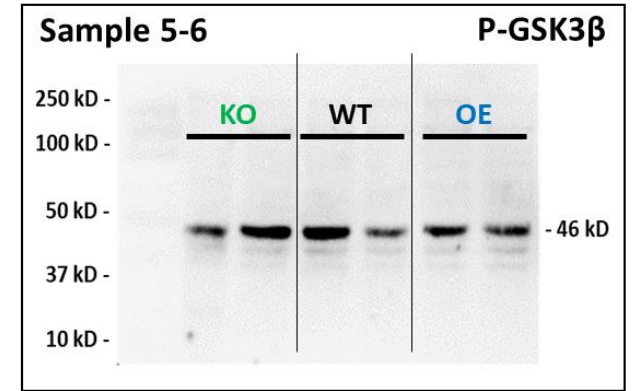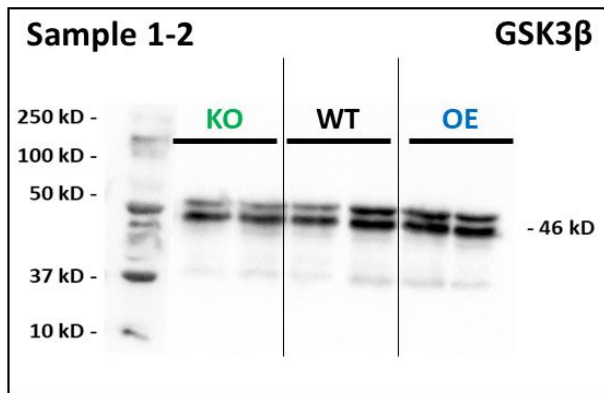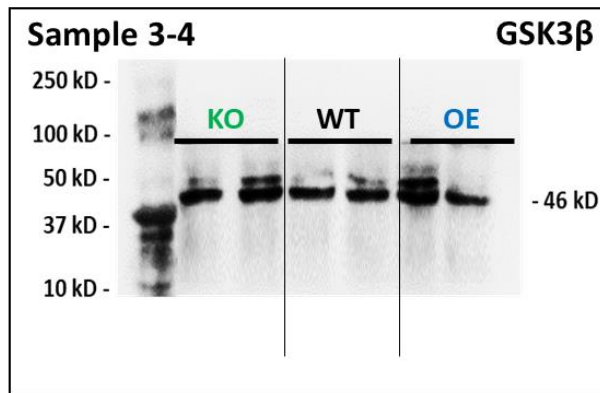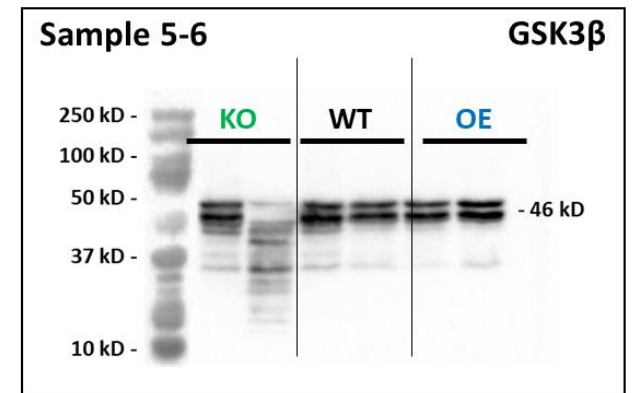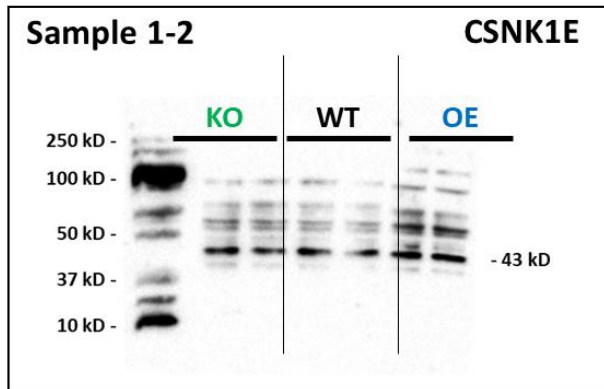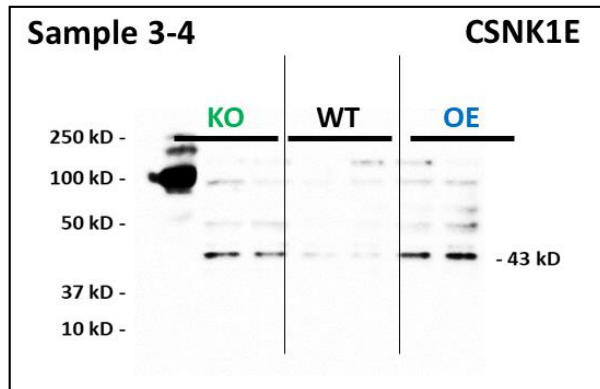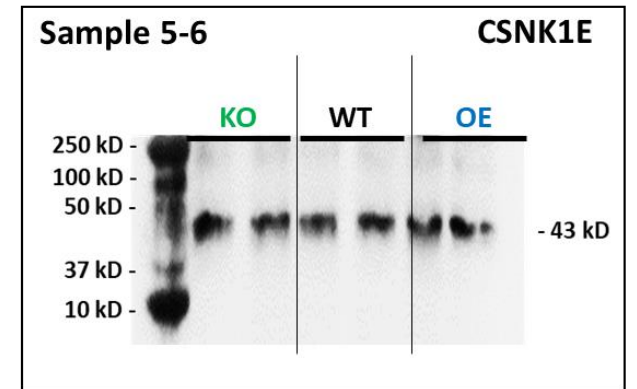

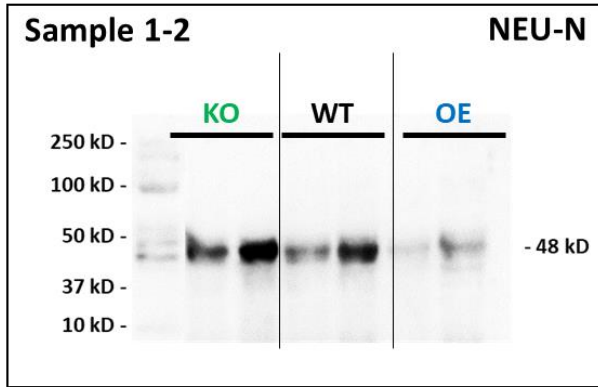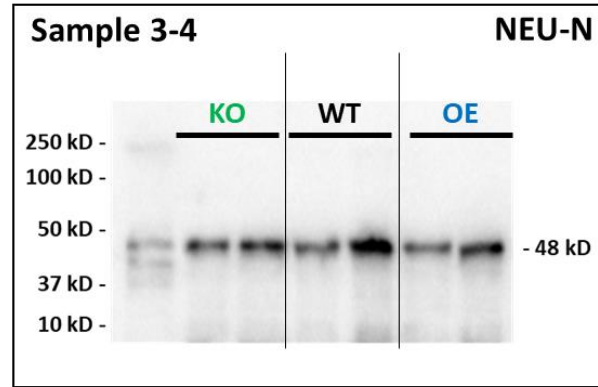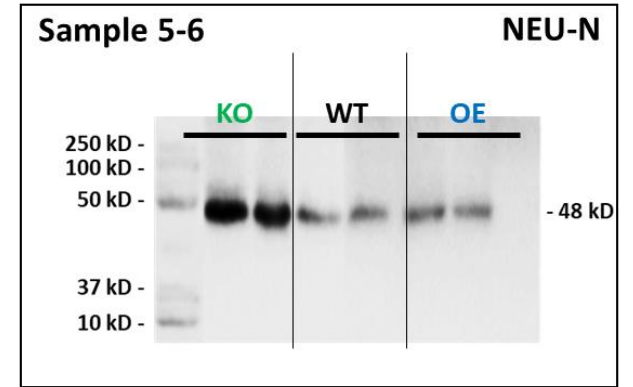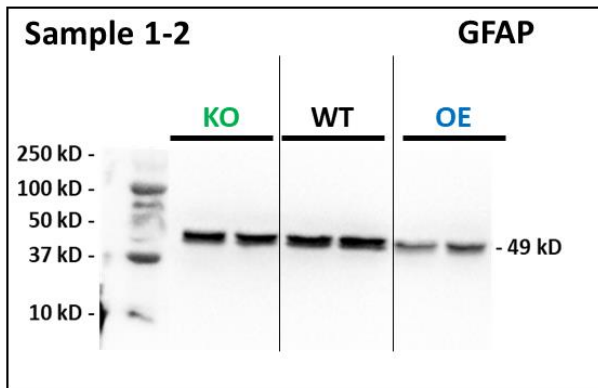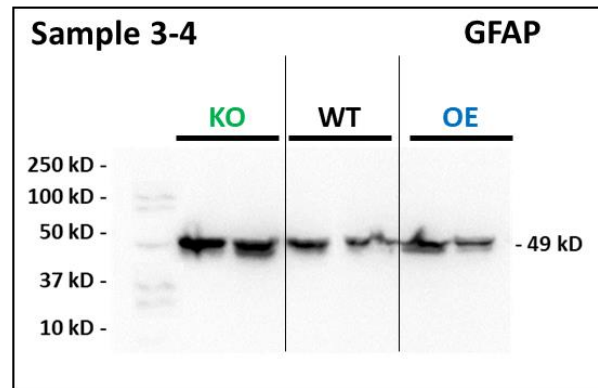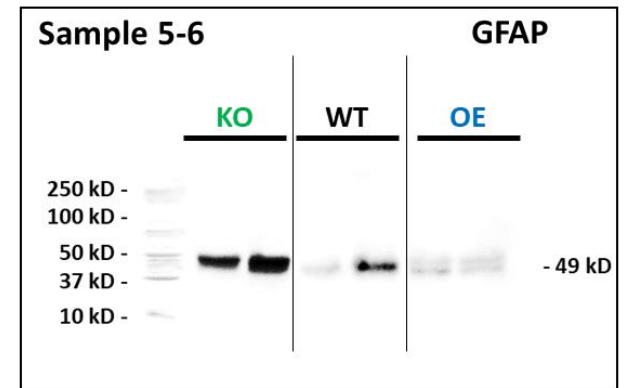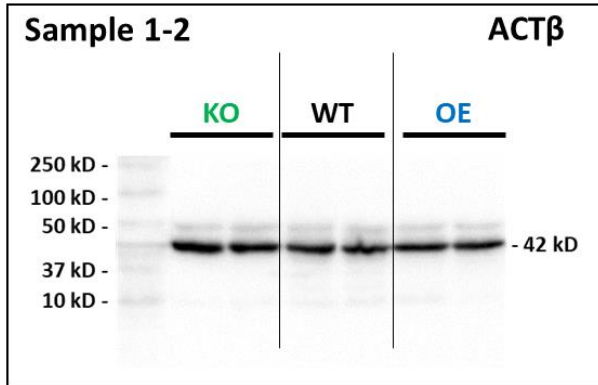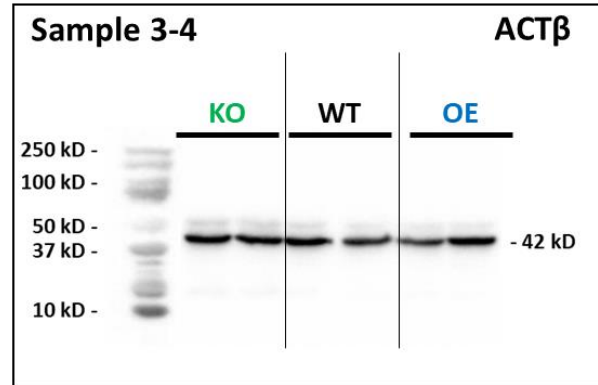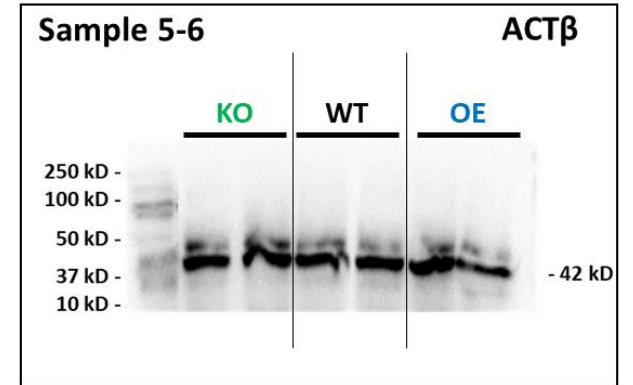

Figure 8i/Figure 9b

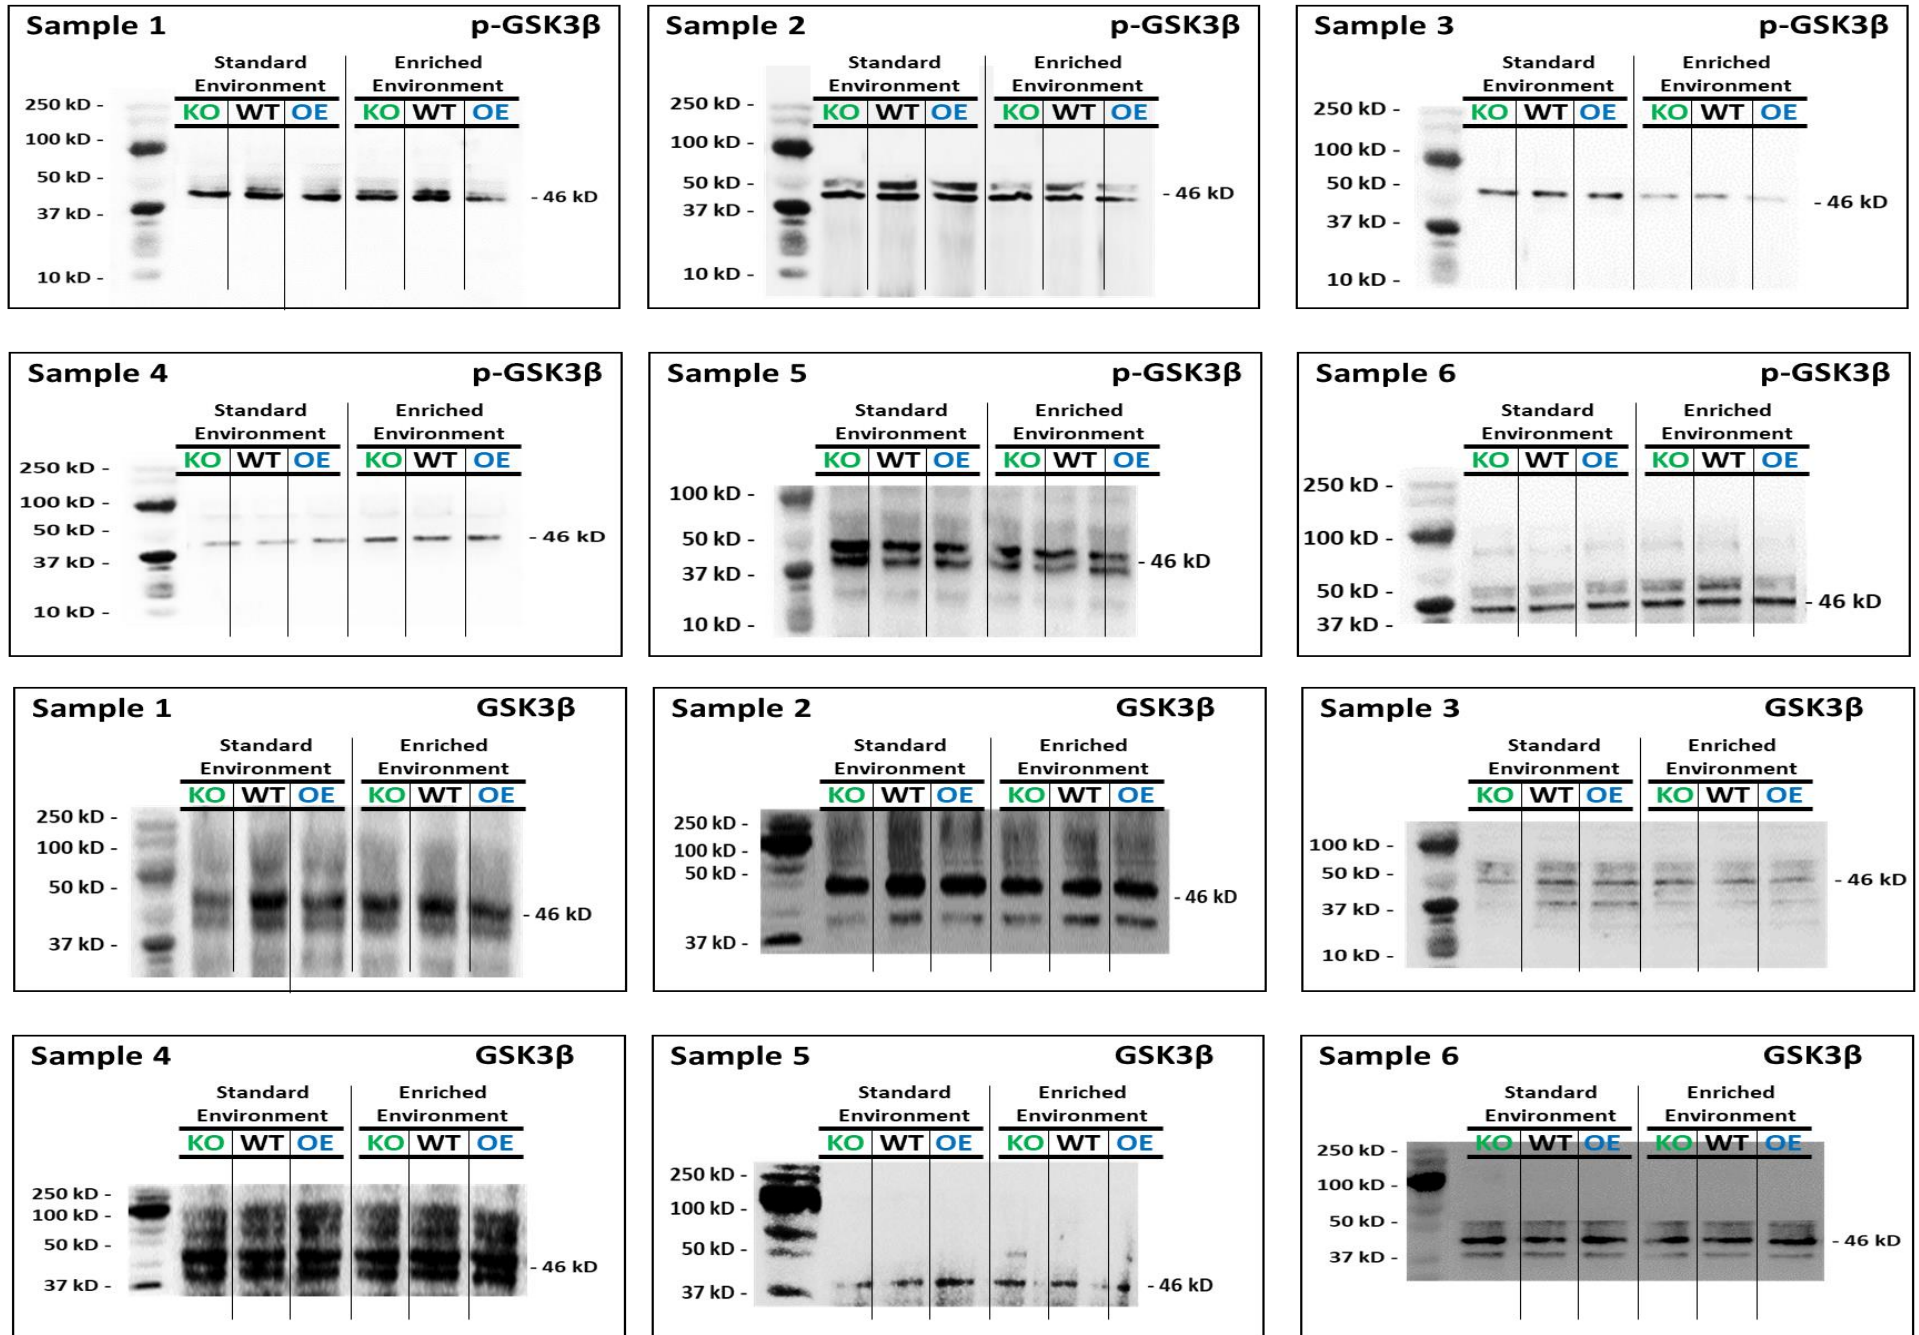

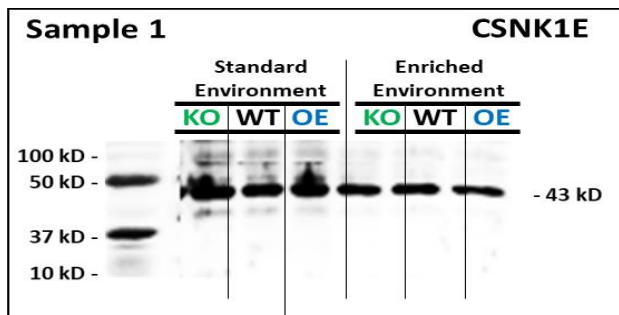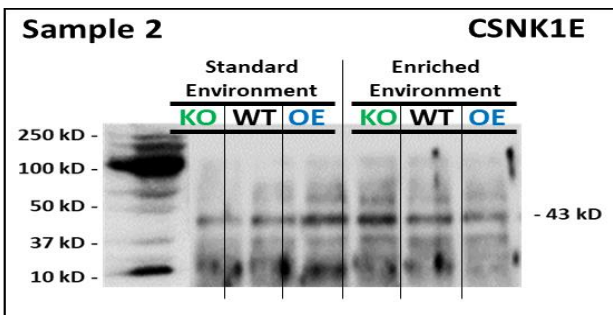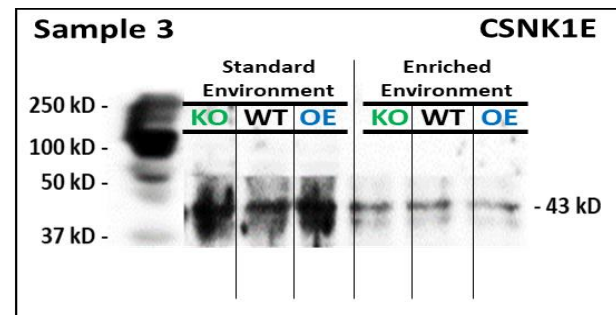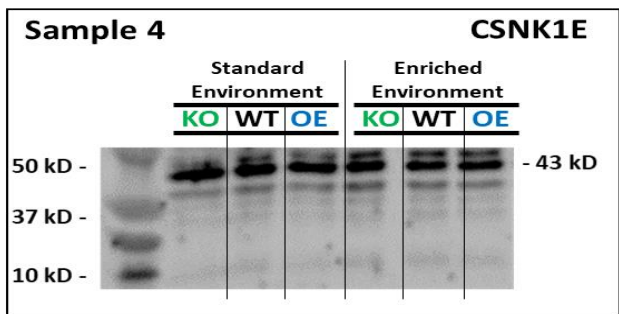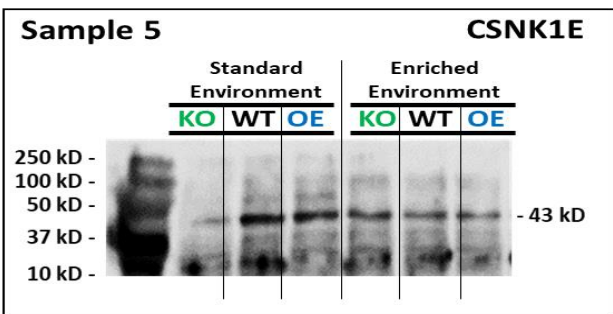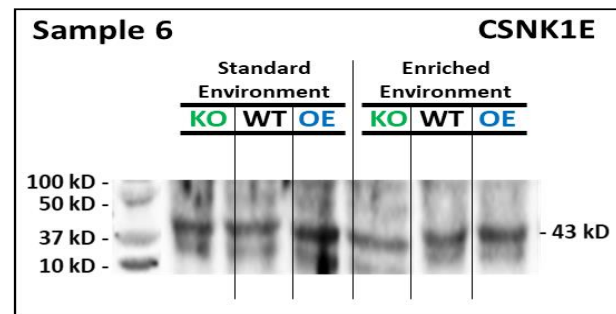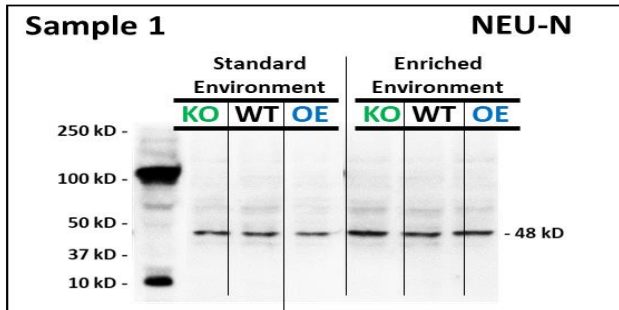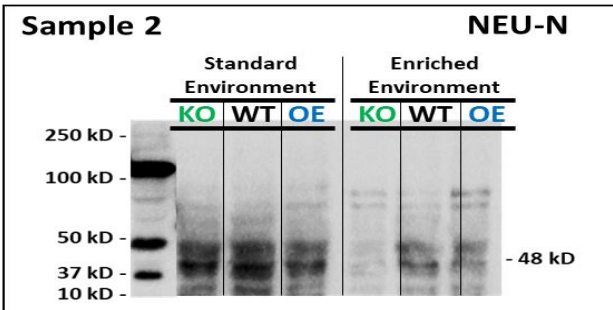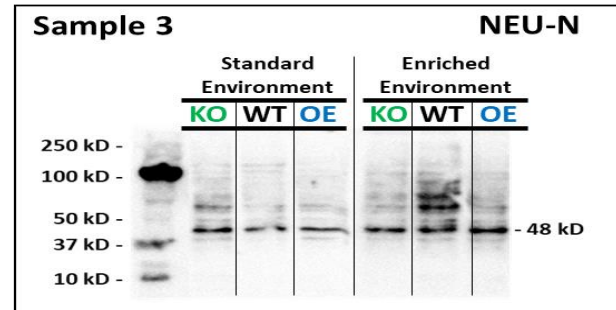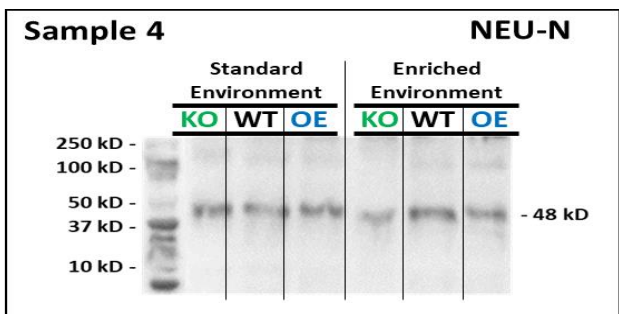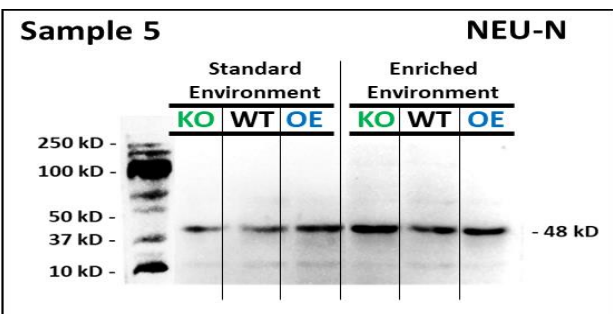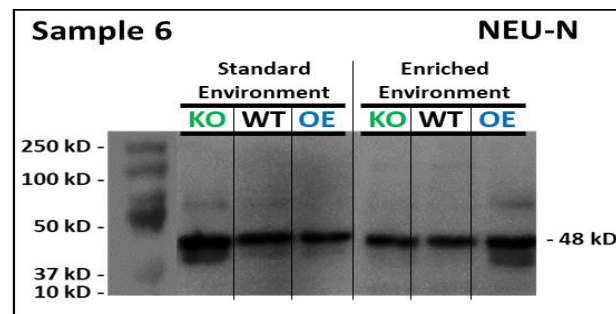

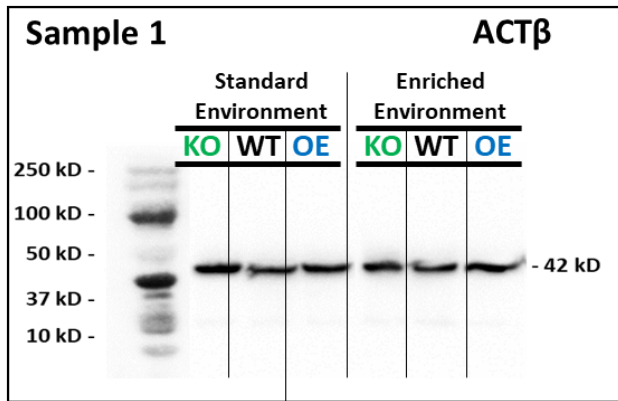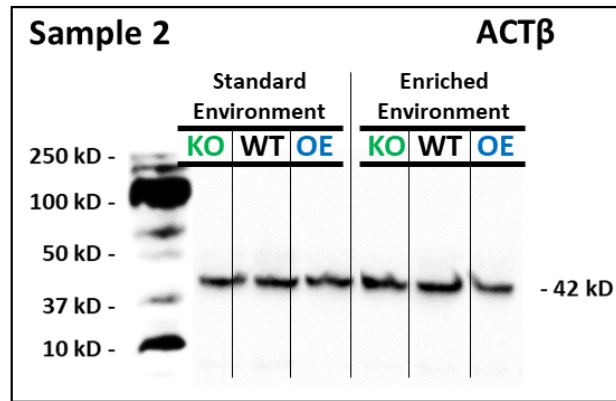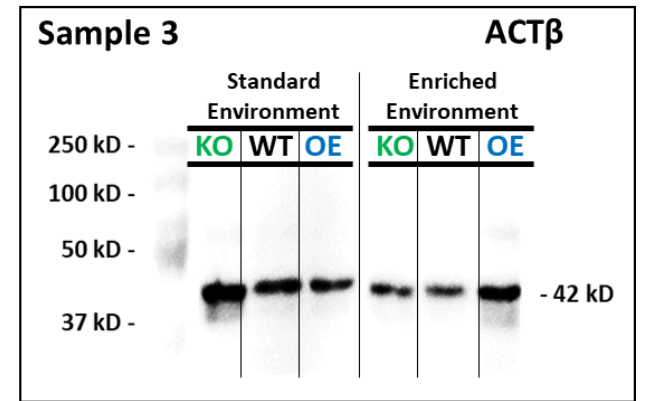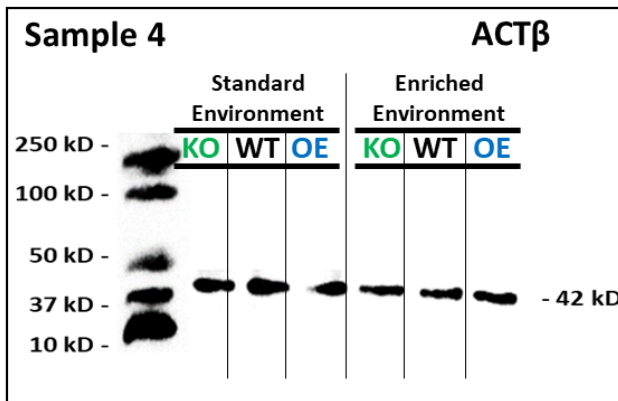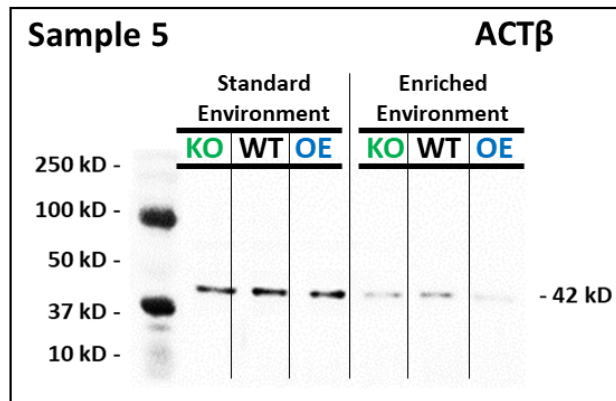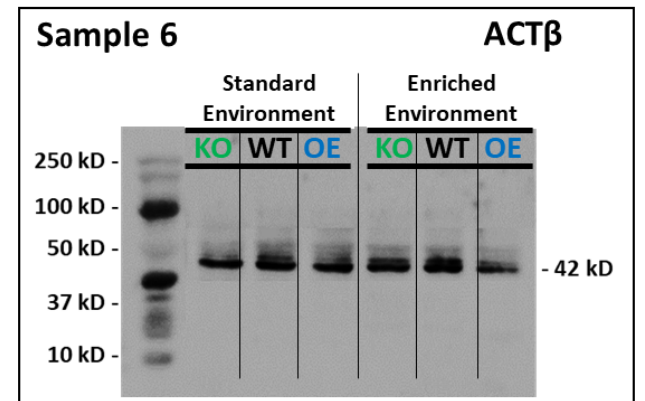

Supplementary Table 1.

| Number | Accession | Protein Name                                                  | Gene Name | PLGEM-STN | p Value |
|--------|-----------|---------------------------------------------------------------|-----------|-----------|---------|
| 1      | O70340    | Neuronal pentraxin-2                                          | Nptx2     | 4.2109    | 0.0000  |
| 2      | Q9WV92    | Band 4.1-like protein 3                                       | Epb41l3   | 3.3043    | 0.0000  |
| 3      | Q9Z2T6    | Keratin type II cuticular Hb5                                 | Krt85     | 3.2156    | 0.0000  |
| 4      | Q6P5D3    | Putative ATP-dependent RNA helicase DHX57                     | Dhx57     | 3.1513    | 0.0000  |
| 5      | Q4FZC9    | Nesprin-3                                                     | Syne3     | 3.0656    | 0.0001  |
| 6      | Q8C1B7    | Septin-11                                                     | Septin11  | 2.8961    | 0.0001  |
| 7      | Q8CGI1    | Protein FAM193A                                               | Fam193a   | 2.8821    | 0.0001  |
| 8      | O89053    | Coronin-1A                                                    | Coro1a    | 2.8326    | 0.0001  |
| 9      | P14733    | Lamin-B1                                                      | Lmnb1     | 2.8135    | 0.0001  |
| 10     | Q7TSJ2    | Microtubule-associated protein 6                              | Map6      | 2.7530    | 0.0001  |
| 11     | Q7TQG1    | Pleckstrin homology domain-containing family A member 6       | Plekha6   | 2.6776    | 0.0001  |
| 12     | P28665    | Murinoglobulin-1                                              | Mug1      | 2.6599    | 0.0001  |
| 13     | Q9QW16    | SRC kinase signaling inhibitor 1                              | Srcin1    | 2.6125    | 0.0001  |
| 14     | Q811Q9    | Choline-phosphate cytidyltransferase B                        | Pcyt1b    | 2.6039    | 0.0001  |
| 15     | P49025    | Citron Rho-interacting kinase                                 | Cit       | 2.5870    | 0.0001  |
| 16     | Q8CFN5    | Myocyte-specific enhancer factor 2C                           | Mef2c     | 2.5778    | 0.0001  |
| 17     | Q99K48    | Non-POU domain-containing octamer-binding protein             | Nono      | 2.5577    | 0.0002  |
| 18     | Q8CHS8    | Vacuolar protein sorting-associated protein 37A               | Vps37a    | 2.5471    | 0.0002  |
| 19     | B1AZI6    | THO complex subunit 2                                         | Thoc2     | 2.5398    | 0.0002  |
| 20     | Q61072    | Disintegrin and metalloproteinase domain-containing protein 9 | Adam9     | 2.4580    | 0.0002  |
| 21     | Q62407    | Striated muscle-specific serine/threonine-protein kinase      | Speg      | 2.4520    | 0.0002  |
| 22     | Q80TR8    | DDB1- and CUL4-associated factor 1                            | Dcaf1     | 2.4350    | 0.0002  |
| 23     | P50608    | Fibromodulin                                                  | Fmod      | 2.4120    | 0.0002  |
| 24     | Q80U72    | Protein scribble homolog                                      | Scrib     | 2.3760    | 0.0002  |
| 25     | Q80TK0    | AP2-interacting clathrin-endocytosis protein                  | Kiaa1107  | 2.3626    | 0.0002  |
| 26     | Q6VNB8    | WD repeat and FYVE domain-containing protein 3                | Wdfy3     | 2.3122    | 0.0003  |
| 27     | Q8BRJ3    | RELT-like protein 2                                           | Rel12     | 2.3084    | 0.0003  |
| 28     | Q8BUR4    | Dedicator of cytokinesis protein 1                            | Dock1     | 2.2389    | 0.0003  |
| 29     | A2CG49    | Kalirin                                                       | Kalrn     | 2.2232    | 0.0003  |
| 30     | Q9JI10    | Serine/threonine-protein kinase 3                             | Stk3      | 2.2205    | 0.0003  |
| 31     | Q6QD59    | Vesicle transport protein SEC20                               | Bnip1     | 2.2194    | 0.0003  |
| 32     | Q9ERE2    | Keratin type II cuticular Hb1                                 | Krt81     | 2.2095    | 0.0003  |
| 33     | P97861    | Keratin type II cuticular Hb6                                 | Krt86     | 2.2095    | 0.0003  |
| 34     | P31750    | RAC-alpha serine/threonine-protein kinase                     | Akt1      | 2.2082    | 0.0003  |
| 35     | Q9WTX6    | Cullin-1                                                      | Cul1      | 2.2043    | 0.0003  |
| 36     | Q3TVA9    | Coiled-coil domain-containing protein 136                     | Ccdc136   | 2.1942    | 0.0003  |
| 37     | Q63943    | Myocyte-specific enhancer factor 2D                           | Mef2d     | 2.1848    | 0.0004  |
| 38     | Q8CC35    | Synaptopodin                                                  | Synpo     | 2.1771    | 0.0004  |
| 39     | Q569Z6    | Thyroid hormone receptor-associated protein 3                 | Thrap3    | 2.1733    | 0.0004  |
| 40     | Q80YN3    | Breast carcinoma-amplified sequence 1 homolog                 | Bcas1     | 2.1689    | 0.0004  |
| 41     | Q8BTI8    | Serine/arginine repetitive matrix protein 2                   | Srrm2     | 2.1629    | 0.0004  |
| 42     | D3YVF0    | A-kinase anchor protein 5                                     | Akap5     | 2.1456    | 0.0004  |
| 43     | Q5SVL6    | Rap1 GTPase-activating protein 2                              | Rap1gap2  | 2.1313    | 0.0005  |
| 44     | Q8VHK9    | ATP-dependent DNA/RNA helicase DHX36                          | Dhx36     | 2.1266    | 0.0005  |
| 45     | B2RR83    | 3'-5' RNA helicase YTHDC2                                     | Ythdc2    | 2.1012    | 0.0005  |
| 46     | Q3UJB9    | Enhancer of mRNA-decapping protein 4                          | Edc4      | 2.0836    | 0.0005  |
| 47     | O88569    | Heterogeneous nuclear ribonucleoproteins A2/B1                | Hnrnpa2b1 | 2.0726    | 0.0005  |
| 48     | Q9JJK2    | LanC-like protein 2                                           | Lancl2    | 2.0418    | 0.0006  |
| 49     | Q9D394    | Protein RUFY3                                                 | Rufy3     | 2.0391    | 0.0006  |
| 50     | P16858    | Glyceraldehyde-3-phosphate dehydrogenase                      | Gapdh     | 2.0329    | 0.0006  |
| 51     | Q8BYW1    | Rho GTPase-activating protein 25                              | Arhgap25  | 2.0145    | 0.0006  |
| 52     | Q5XJV6    | Serine/threonine-protein kinase LMTK3                         | Lmtk3     | 2.0073    | 0.0006  |
| 53     | Q922P8    | Transmembrane protein 132A                                    | Tmem132a  | 2.0065    | 0.0006  |
| 54     | Q68EF4    | Metabotropic glutamate receptor 4                             | Grm4      | 2.0065    | 0.0006  |
| 55     | Q8BZZ3    | NEDD4-like E3 ubiquitin-protein ligase WWP1                   | Wwp1      | 2.0056    | 0.0006  |
| 56     | Q62383    | Transcription elongation factor SPT6                          | Supt6h    | 2.0056    | 0.0006  |
| 57     | Q8R146    | Acylamino-acid-releasing enzyme                               | Apeh      | 1.9919    | 0.0006  |
| 58     | Q5DU31    | Interactor protein for cytohesin exchange factors 1           | Ipcef1    | 1.9764    | 0.0006  |
| 59     | Q9WVR4    | Fragile X mental retardation syndrome-related protein 2       | Fxr2      | 1.9711    | 0.0006  |
| 60     | Q3TCJ1    | BRISC complex subunit Abraxas 2                               | Abraxas2  | 1.9647    | 0.0006  |
| 61     | Q07409    | Contactin-3                                                   | Cntn3     | 1.9647    | 0.0006  |
| 62     | Q8VDL4    | ADP-dependent glucokinase                                     | Adpgk     | 1.9510    | 0.0007  |

|     |        |                                                                                    |            |        |        |
|-----|--------|------------------------------------------------------------------------------------|------------|--------|--------|
| 63  | P84091 | AP-2 complex subunit mu                                                            | Ap2m1      | 1.9462 | 0.0007 |
| 64  | E9PZ19 | Protein turtle homolog B                                                           | Igsf9b     | 1.9305 | 0.0007 |
| 65  | Q88H60 | Golgi-associated PDZ and coiled-coil motif-containing protein                      | Gopc       | 1.9298 | 0.0007 |
| 66  | Q9Z1K6 | E3 ubiquitin-protein ligase ARIH2                                                  | Arih2      | 1.9298 | 0.0007 |
| 67  | Q8C525 | Protein MB21D2                                                                     | Mb21d2     | 1.9298 | 0.0007 |
| 68  | Q62413 | Ephrin type-A receptor 6                                                           | Epha6      | 1.9138 | 0.0007 |
| 69  | P48678 | Prelamin-A/C                                                                       | Lmna       | 1.8907 | 0.0008 |
| 70  | Q80U57 | Regulating synaptic membrane exocytosis protein 3                                  | Rims3      | 1.8804 | 0.0008 |
| 71  | Q60634 | Flotillin-2                                                                        | Flot2      | 1.8722 | 0.0008 |
| 72  | Q9CPU4 | Microsomal glutathione S-transferase 3                                             | Mgst3      | 1.8631 | 0.0008 |
| 73  | Q8VD12 | Zinc finger protein 385A                                                           | Znf385a    | 1.8594 | 0.0009 |
| 74  | Q6ZQH8 | Nucleoporin NUP188                                                                 | Nup188     | 1.8282 | 0.0009 |
| 75  | Q9QXT8 | Calsenilin                                                                         | Kcnp3      | 1.8268 | 0.0009 |
| 76  | O35129 | Prohibitin-2                                                                       | Phb2       | 1.8173 | 0.0009 |
| 77  | Q9QY13 | DnaJ homolog subfamily C member 7                                                  | Dnajc7     | 1.8012 | 0.0010 |
| 78  | O70400 | PDZ and LIM domain protein 1                                                       | Pdlim1     | 1.7940 | 0.0010 |
| 79  | Q99M74 | Keratin type II cuticular Hb2                                                      | Krt82      | 1.7886 | 0.0011 |
| 80  | Q9JKK8 | Serine/threonine-protein kinase ATR                                                | Atr        | 1.7877 | 0.0011 |
| 81  | P29387 | Guanine nucleotide-binding protein subunit beta-4                                  | Gnb4       | 1.7868 | 0.0011 |
| 82  | Q8BZ98 | Dynamin-3                                                                          | Dnm3       | 1.7835 | 0.0011 |
| 83  | Q9ROA0 | Peroxisomal membrane protein PEX14                                                 | Pex14      | 1.7754 | 0.0011 |
| 84  | Q9JIV5 | Voltage-dependent calcium channel gamma-3 subunit                                  | Cacng3     | 1.7723 | 0.0011 |
| 85  | Q8C3F2 | Constitutive coactivator of PPAR-gamma-like protein 2                              | Fam120c    | 1.7698 | 0.0011 |
| 86  | Q8BLE7 | Vesicular glutamate transporter 2                                                  | Slc17a6    | 1.7665 | 0.0011 |
| 87  | O08919 | Numb-like protein                                                                  | Numb1      | 1.7370 | 0.0012 |
| 88  | Q6GSS7 | Histone H2A type 2-A                                                               | Hist2h2aa1 | 1.7364 | 0.0012 |
| 89  | Q64523 | Histone H2A type 2-C                                                               | H2ac20     | 1.7364 | 0.0012 |
| 90  | Q6QI06 | Rapamycin-insensitive companion of mTOR                                            | Rictor     | 1.7339 | 0.0012 |
| 91  | Q8C015 | Serine/threonine-protein kinase PAK 5                                              | Pak5       | 1.7339 | 0.0012 |
| 92  | Q64467 | Glyceraldehyde-3-phosphate dehydrogenase testis-specific                           | Gapdhs     | 1.7330 | 0.0012 |
| 93  | P26645 | Myristoylated alanine-rich C-kinase substrate                                      | Marcks     | 1.7311 | 0.0012 |
| 94  | Q8K4Q0 | Regulatory-associated protein of mTOR                                              | Rptor      | 1.7259 | 0.0012 |
| 95  | Q99P47 | Contactin-associated protein-like 4                                                | Cntnap4    | 1.7244 | 0.0012 |
| 96  | Q8K010 | 5-oxoprolinase                                                                     | Oplah      | 1.7237 | 0.0012 |
| 97  | Q6P456 | Serine/threonine-protein kinase SIK3                                               | Sik3       | 1.7216 | 0.0012 |
| 98  | Q9WTS2 | Alpha-(1 6)-fucosyltransferase                                                     | Fut8       | 1.7191 | 0.0012 |
| 99  | Q8C7D2 | Protein cereblon                                                                   | Crbn       | 1.7191 | 0.0012 |
| 100 | Q61686 | Chromobox protein homolog 5                                                        | Cbx5       | 1.7191 | 0.0012 |
| 101 | Q9EQS9 | Immunoglobulin superfamily DCC subclass member 4                                   | Igdcc4     | 1.7191 | 0.0012 |
| 102 | E9Q4S1 | High affinity cAMP-specific and IBMX-insensitive 3' 5'-cyclic phosphodiesterase 8B | Pde8b      | 1.7191 | 0.0012 |
| 103 | O08644 | Ephrin type-B receptor 6                                                           | Ephb6      | 1.7163 | 0.0012 |
| 104 | Q9WUA6 | RAC-gamma serine/threonine-protein kinase                                          | Akt3       | 1.7025 | 0.0013 |
| 105 | P07310 | Creatine kinase M-type                                                             | Ckm        | 1.6964 | 0.0013 |
| 106 | Q8JZK9 | Hydroxymethylglutaryl-CoA synthase cytoplasmic                                     | Hmgcs1     | 1.6877 | 0.0013 |
| 107 | Q99KI0 | Aconitate hydratase mitochondrial                                                  | Aco2       | 1.6753 | 0.0013 |
| 108 | Q149F3 | Eukaryotic peptide chain release factor GTP-binding subunit ERF3B                  | Gspt2      | 1.6646 | 0.0014 |
| 109 | Q91WM1 | Spermatid perinuclear RNA-binding protein                                          | Strbp      | 1.6570 | 0.0014 |
| 110 | P08775 | DNA-directed RNA polymerase II subunit RPB1                                        | Polr2a     | 1.6466 | 0.0014 |
| 111 | Q4VAA2 | Protein CDV3                                                                       | Cdv3       | 1.6421 | 0.0014 |
| 112 | Q8K019 | Bcl-2-associated transcription factor 1                                            | Bclaf1     | 1.6353 | 0.0015 |
| 113 | Q8BIV3 | Ran-binding protein 6                                                              | Ranbp6     | 1.6350 | 0.0015 |
| 114 | Q80YE7 | Death-associated protein kinase 1                                                  | Dapk1      | 1.6316 | 0.0015 |
| 115 | Q9DBS9 | Oxysterol-binding protein-related protein 3                                        | Osbpl3     | 1.6276 | 0.0015 |
| 116 | P50096 | Inosine-5'-monophosphate dehydrogenase 1                                           | Impdh1     | 1.6276 | 0.0015 |
| 117 | Q5DU25 | IQ motif and SEC7 domain-containing protein 2                                      | Iqsec2     | 1.6259 | 0.0015 |
| 118 | Q8BH66 | Atlastin-1                                                                         | At1        | 1.6219 | 0.0015 |
| 119 | Q9DBE8 | Alpha-1 3/1 6-mannosyltransferase ALG2                                             | Alg2       | 1.6192 | 0.0015 |
| 120 | O55131 | Septin-7                                                                           | Septin7    | 1.6171 | 0.0015 |
| 121 | Q811P8 | Rho GTPase-activating protein 32                                                   | Arhgap32   | 1.6138 | 0.0015 |
| 122 | Q91V12 | Cytosolic acyl coenzyme A thioester hydrolase                                      | Acot7      | 1.6052 | 0.0016 |
| 123 | A2A690 | Protein TANC2                                                                      | Tanc2      | 1.6045 | 0.0016 |
| 124 | Q09M02 | Cytosolic carboxypeptidase-like protein 5                                          | Agbl5      | 1.6040 | 0.0016 |
| 125 | Q8CAL5 | Glypican-5                                                                         | Gpc5       | 1.6009 | 0.0016 |
| 126 | Q9D486 | C-Maf-inducing protein                                                             | Cmip       | 1.6009 | 0.0016 |



|     |        |                                                                         |          |        |        |
|-----|--------|-------------------------------------------------------------------------|----------|--------|--------|
| 127 | P12023 | Amyloid-beta A4 protein                                                 | App      | 1.6006 | 0.0016 |
| 128 | O88811 | Signal transducing adapter molecule 2                                   | Stam2    | 1.6002 | 0.0016 |
| 129 | Q9D6I9 | Leucine rich adaptor protein 1                                          | Lurap1   | 1.6002 | 0.0016 |
| 130 | Q9CY27 | Very-long-chain enoyl-CoA reductase                                     | Tecr     | 1.5917 | 0.0016 |
| 131 | Q6PFQ7 | Ras GTPase-activating protein 4                                         | Rasa4    | 1.5917 | 0.0016 |
| 132 | P06745 | Glucose-6-phosphate isomerase                                           | Gpi      | 1.5795 | 0.0017 |
| 133 | Q8CHT1 | Ephexin-1                                                               | Ngef     | 1.5740 | 0.0017 |
| 134 | P22723 | Gamma-aminobutyric acid receptor subunit gamma-2                        | Gabrg2   | 1.5722 | 0.0017 |
| 135 | Q61189 | Methylosome subunit pICln                                               | Clns1a   | 1.5688 | 0.0017 |
| 136 | Q5DTM8 | E3 ubiquitin-protein ligase BRE1A                                       | Rnf20    | 1.5600 | 0.0019 |
| 137 | Q08890 | Iduronate 2-sulfatase                                                   | Ids      | 1.5600 | 0.0019 |
| 138 | Q9JI11 | Serine/threonine-protein kinase 4                                       | Stk4     | 1.5586 | 0.0019 |
| 139 | P60670 | Nuclear protein localization protein 4 homolog                          | Nploc4   | 1.5486 | 0.0019 |
| 140 | Q8K2B3 | Succinate dehydrogenase [ubiquinone] flavoprotein subunit mitochondrial | Sdha     | 1.5465 | 0.0019 |
| 141 | P52479 | Ubiquitin carboxyl-terminal hydrolase 10                                | Usp10    | 1.5446 | 0.0019 |
| 142 | Q9QZB0 | Regulator of G-protein signaling 17                                     | Rgs17    | 1.5446 | 0.0019 |
| 143 | Q80YV4 | 4'-phosphopantetheine phosphatase                                       | Pank4    | 1.5411 | 0.0020 |
| 144 | Q6A0A2 | La-related protein 4B                                                   | Larp4b   | 1.5398 | 0.0020 |
| 145 | Q6ZWR6 | Nesprin-1                                                               | Syne1    | 1.5363 | 0.0020 |
| 146 | Q9QZB7 | Actin-related protein 10                                                | Actr10   | 1.5291 | 0.0021 |
| 147 | Q8CIN6 | CUGBP Elav-like family member 3                                         | Celf3    | 1.5264 | 0.0021 |
| 148 | Q8R526 | Polycystic kidney disease protein 1-like 1                              | Pkd1l1   | 1.5264 | 0.0021 |
| 149 | Q99LI2 | Chloride channel CLIC-like protein 1                                    | Clcc1    | 1.5196 | 0.0021 |
| 150 | P18581 | Cationic amino acid transporter 2                                       | Slc7a2   | 1.5196 | 0.0021 |
| 151 | P97386 | DNA ligase 3                                                            | Lig3     | 1.5196 | 0.0021 |
| 152 | P34152 | Focal adhesion kinase 1                                                 | Ptk2     | 1.5095 | 0.0022 |
| 153 | Q6A065 | Centrosomal protein of 170 kDa                                          | Cep170   | 1.5090 | 0.0022 |
| 154 | Q8VEE1 | LIM and cysteine-rich domains protein 1                                 | Lmcd1    | 1.5086 | 0.0022 |
| 155 | P48193 | Protein 4.1                                                             | Epb41    | 1.5086 | 0.0022 |
| 156 | Q9EPX2 | Papilin                                                                 | Papln    | 1.5052 | 0.0022 |
| 157 | Q60598 | Src substrate cortactin                                                 | Cctn     | 1.5034 | 0.0022 |
| 158 | P36993 | Protein phosphatase 1B                                                  | Ppm1b    | 1.5012 | 0.0022 |
| 159 | Q80SW1 | S-adenosylhomocysteine hydrolase-like protein 1                         | Ahcy1    | 1.5009 | 0.0022 |
| 160 | Q99NE5 | Regulating synaptic membrane exocytosis protein 1                       | Rims1    | 1.4859 | 0.0022 |
| 161 | P18572 | Basigin                                                                 | Bsg      | 1.4844 | 0.0023 |
| 162 | Q8R1M2 | Histone H2A.J                                                           | H2aj     | 1.4805 | 0.0023 |
| 163 | Q80U49 | Centrosomal protein of 170 kDa protein B                                | Cep170b  | 1.4795 | 0.0023 |
| 164 | P60882 | Multiple epidermal growth factor-like domains protein 8                 | Megf8    | 1.4771 | 0.0024 |
| 165 | P97445 | Voltage-dependent P/Q-type calcium channel subunit alpha-1A             | Cacna1a  | 1.4660 | 0.0025 |
| 166 | E9Q912 | Rap1 GTPase-GDP dissociation stimulator 1                               | Rap1gds1 | 1.4584 | 0.0025 |
| 167 | Q8BJ42 | Disks large-associated protein 2                                        | Dlgap2   | 1.4549 | 0.0027 |
| 168 | P54731 | FAS-associated factor 1                                                 | Faf1     | 1.4541 | 0.0027 |
| 169 | P97490 | Adenylate cyclase type 8                                                | Adcy8    | 1.4534 | 0.0027 |
| 170 | Q5SUE8 | Ankyrin repeat domain-containing protein 40                             | Ankrd40  | 1.4470 | 0.0028 |
| 171 | Q3USL1 | Kelch domain-containing protein 9                                       | Klhd9    | 1.4470 | 0.0028 |
| 172 | Q3UQN2 | F-BAR domain only protein 2                                             | Fcho2    | 1.4470 | 0.0028 |
| 173 | Q8BHT6 | Beta-1 3-glycosyltransferase                                            | B3glct   | 1.4470 | 0.0028 |
| 174 | Q9JLC4 | VPS10 domain-containing receptor SorCS1                                 | Sorcs1   | 1.4470 | 0.0028 |
| 175 | Q9Z0W3 | Nuclear pore complex protein Nup160                                     | Nup160   | 1.4470 | 0.0028 |
| 176 | B2RY04 | Dedicator of cytokinesis protein 5                                      | Dock5    | 1.4470 | 0.0028 |
| 177 | A2A8U2 | Transmembrane protein 201                                               | Tmem201  | 1.4470 | 0.0028 |
| 178 | Q9D968 | Host cell factor 2                                                      | Hcfc2    | 1.4470 | 0.0028 |
| 179 | Q91YT2 | E3 ubiquitin-protein ligase RNF185                                      | Rnf185   | 1.4470 | 0.0028 |
| 180 | Q8BL43 | Ras association domain-containing protein 10                            | Rassf10  | 1.4470 | 0.0028 |
| 181 | Q99MD9 | Nuclear autoantigenic sperm protein                                     | Nasp     | 1.4470 | 0.0028 |
| 182 | Q9Z2G1 | Protein fem-1 homolog A-A                                               | Fem1aa   | 1.4470 | 0.0028 |
| 183 | P62881 | Guanine nucleotide-binding protein subunit beta-5                       | Gnb5     | 1.4455 | 0.0028 |
| 184 | Q80TT8 | Cullin-9                                                                | Cul9     | 1.4386 | 0.0028 |
| 185 | Q8CGF7 | Transcription elongation regulator 1                                    | Tcerg1   | 1.4334 | 0.0029 |
| 186 | O08599 | Syntaxin-binding protein 1                                              | Stxbp1   | 1.4331 | 0.0029 |
| 187 | P47738 | Aldehyde dehydrogenase mitochondrial                                    | Aldh2    | 1.4251 | 0.0029 |
| 188 | Q9R1Q9 | V-type proton ATPase subunit S1                                         | Atp6ap1  | 1.4209 | 0.0030 |
| 189 | P63085 | Mitogen-activated protein kinase 1                                      | Mapk1    | 1.4185 | 0.0030 |
| 190 | Q5U4F6 | Cytoplasmic dynein 2 intermediate chain 2                               | Dync2i2  | 1.4028 | 0.0031 |

|     |        |                                                                     |           |        |        |
|-----|--------|---------------------------------------------------------------------|-----------|--------|--------|
| 191 | Q8BFW7 | Lipoma-preferred partner homolog                                    | Lpp       | 1.4005 | 0.0031 |
| 192 | Q9DBD5 | Proline- glutamic acid- and leucine-rich protein 1                  | Pelp1     | 1.4005 | 0.0031 |
| 193 | Q8R1F1 | Protein Niban 2                                                     | Niban2    | 1.4005 | 0.0031 |
| 194 | Q99PV0 | Pre-mRNA-processing-splicing factor 8                               | Prpf8     | 1.3992 | 0.0031 |
| 195 | Q8BGW1 | Alpha-ketoglutarate-dependent dioxygenase FTO                       | Fto       | 1.3990 | 0.0031 |
| 196 | Q9JLT4 | Thioredoxin reductase 2 mitochondrial                               | Txnrd2    | 1.3989 | 0.0031 |
| 197 | Q8K0T4 | Katanin p60 ATPase-containing subunit A-like 1                      | Katnal1   | 1.3986 | 0.0031 |
| 198 | Q35954 | Membrane-associated phosphatidylinositol transfer protein 1         | Pitpnm1   | 1.3976 | 0.0031 |
| 199 | Q9D6F4 | Gamma-aminobutyric acid receptor subunit alpha-4                    | Gabra4    | 1.3943 | 0.0031 |
| 200 | Q8BH24 | Transmembrane 9 superfamily member 4                                | Tm9sf4    | 1.3943 | 0.0031 |
| 201 | Q8OW47 | WD repeat domain phosphoinositide-interacting protein 2             | Wipi2     | 1.3846 | 0.0032 |
| 202 | Q8CJH3 | Plexin-B1                                                           | Plxnbl1   | 1.3834 | 0.0032 |
| 203 | Q8C2Q3 | RNA-binding protein 14                                              | Rbm14     | 1.3816 | 0.0033 |
| 204 | Q8R4C2 | RUN and FYVE domain-containing protein 2                            | Rufy2     | 1.3810 | 0.0033 |
| 205 | Q9QZS3 | Protein numb homolog                                                | Numb      | 1.3796 | 0.0033 |
| 206 | Q9JKY5 | Huntingtin-interacting protein 1-related protein                    | Hip1r     | 1.3725 | 0.0033 |
| 207 | Q99KP6 | Pre-mRNA-processing factor 19                                       | Prpf19    | 1.3710 | 0.0033 |
| 208 | Q4VA61 | Down syndrome cell adhesion molecule-like protein 1 homolog         | Dscaml1   | 1.3666 | 0.0034 |
| 209 | Q5DTL9 | Sodium-driven chloride bicarbonate exchanger                        | Slc4a10   | 1.3660 | 0.0034 |
| 210 | Q64442 | Sorbitol dehydrogenase                                              | Sord      | 1.3624 | 0.0035 |
| 211 | Q8BIJ7 | RUN and FYVE domain-containing protein 1                            | Rufy1     | 1.3554 | 0.0035 |
| 212 | A2AQ25 | Sickle tail protein                                                 | Skt       | 1.3443 | 0.0037 |
| 213 | Q4VBD2 | Transmembrane anterior posterior transformation protein 1           | Taptp1    | 1.3412 | 0.0037 |
| 214 | Q8C1A5 | Thimet oligopeptidase                                               | Thop1     | 1.3399 | 0.0038 |
| 215 | Q91XU3 | Phosphatidylinositol 5-phosphate 4-kinase type-2 gamma              | Pip4k2c   | 1.3375 | 0.0038 |
| 216 | Q8BG81 | Polymerase delta-interacting protein 3                              | Poldip3   | 1.3371 | 0.0038 |
| 217 | Q64444 | Carbonic anhydrase 4                                                | Ca4       | 1.3365 | 0.0038 |
| 218 | E9PUL5 | Proline-rich transmembrane protein 2                                | Prpt2     | 1.3361 | 0.0038 |
| 219 | Q8K4B0 | Metastasis-associated protein MTA1                                  | Mta1      | 1.3354 | 0.0038 |
| 220 | Q8C4B4 | Protein unc-119 homolog B                                           | Unc119b   | 1.3295 | 0.0039 |
| 221 | P10852 | 4F2 cell-surface antigen heavy chain                                | Slc3a2    | 1.3285 | 0.0039 |
| 222 | Q9EQZ7 | Regulating synaptic membrane exocytosis protein 2                   | Rims2     | 1.3252 | 0.0039 |
| 223 | Q6ZQ93 | Ubiquitin carboxyl-terminal hydrolase 34                            | Usp34     | 1.3243 | 0.0040 |
| 224 | Q8CFE4 | SCY1-like protein 2                                                 | Scyl2     | 1.3171 | 0.0040 |
| 225 | P28063 | Proteasome subunit beta type-8                                      | Psmb8     | 1.3170 | 0.0040 |
| 226 | P58158 | Galactosylgalactosylxylosylprotein 3-beta-glucuronosyltransferase 3 | B3gat3    | 1.3170 | 0.0040 |
| 227 | Q3U1Y4 | DENN domain-containing protein 4B                                   | Dennd4b   | 1.3170 | 0.0040 |
| 228 | Q6PDH0 | Pleckstrin homology-like domain family B member 1                   | Phldb1    | 1.3170 | 0.0040 |
| 229 | Q8VDI7 | Ubiquitin-associated domain-containing protein 1                    | Ubac1     | 1.3170 | 0.0040 |
| 230 | Q8BWG8 | Beta-arrestin-1                                                     | Arrb1     | 1.3168 | 0.0040 |
| 231 | P62874 | Guanine nucleotide-binding protein G(I)/G(S)/G(T) subunit beta-1    | Gnb1      | 1.3159 | 0.0041 |
| 232 | Q61165 | Sodium/hydrogen exchanger 1                                         | Slc9a1    | 1.3133 | 0.0041 |
| 233 | P14148 | 60S ribosomal protein L7                                            | Rpl7      | 1.3117 | 0.0042 |
| 234 | Q8K2K6 | Arf-GAP domain and FG repeat-containing protein 1                   | Agfg1     | 1.3095 | 0.0042 |
| 235 | A2ALS5 | Rap1 GTPase-activating protein 1                                    | Rap1gap   | 1.3094 | 0.0042 |
| 236 | O54865 | Guanylate cyclase soluble subunit beta-1                            | Gucy1b1   | 1.3045 | 0.0042 |
| 237 | Q3V1L4 | Cytosolic purine 5'-nucleotidase                                    | Nt5c2     | 1.3017 | 0.0042 |
| 238 | Q8BLQ9 | Cell adhesion molecule 2                                            | Cadm2     | 1.3002 | 0.0054 |
| 239 | Q14C51 | Pentatricopeptide repeat domain-containing protein 3 mitochondrial  | Ptcd3     | 1.2991 | 0.0055 |
| 240 | O88602 | Voltage-dependent calcium channel gamma-2 subunit                   | Cacng2    | 1.2990 | 0.0055 |
| 241 | Q9Z275 | Retinaldehyde-binding protein 1                                     | Rlbp1     | 1.2982 | 0.0055 |
| 242 | P51859 | Hepatoma-derived growth factor                                      | Hdgf      | 1.2982 | 0.0055 |
| 243 | Q8BHJ5 | F-box-like/WD repeat-containing protein TBL1XR1                     | Tbl1xr1   | 1.2978 | 0.0055 |
| 244 | Q8VDZ4 | Palmitoyltransferase ZDHHC5                                         | Zdhhc5    | 1.2978 | 0.0055 |
| 245 | A2RSQ0 | DENN domain-containing protein 5B                                   | Dennd5b   | 1.2978 | 0.0055 |
| 246 | Q9D1F4 | Proline-rich AKT1 substrate 1                                       | Akt1s1    | 1.2978 | 0.0055 |
| 247 | Q923D5 | WW domain-binding protein 11                                        | Wbp11     | 1.2978 | 0.0055 |
| 248 | Q9R0U0 | Serine/arginine-rich splicing factor 10                             | Srsf10    | 1.2978 | 0.0055 |
| 249 | Q5KU39 | Vacuolar protein sorting-associated protein 41 homolog              | Vps41     | 1.2967 | 0.0055 |
| 250 | Q8CGP0 | Histone H2B type 3-B                                                | H2bu1     | 1.2961 | 0.0055 |
| 251 | Q9D2U9 | Histone H2B type 3-A                                                | Hist3h2ba | 1.2961 | 0.0055 |
| 252 | P62880 | Guanine nucleotide-binding protein G(I)/G(S)/G(T) subunit beta-2    | Gnb2      | 1.2958 | 0.0055 |
| 253 | Q9CZX8 | 40S ribosomal protein S19                                           | Rps19     | 1.2944 | 0.0055 |
| 254 | A2AHC3 | Calmodulin-regulated spectrin-associated protein 1                  | Camsap1   | 1.2922 | 0.0055 |

|     |        |                                                                               |           |        |        |
|-----|--------|-------------------------------------------------------------------------------|-----------|--------|--------|
| 255 | Q76LS9 | Ubiquitin carboxyl-terminal hydrolase MINDY-1                                 | Mindy1    | 1.2899 | 0.0056 |
| 256 | P47857 | ATP-dependent 6-phosphofructokinase muscle type                               | Pfkm      | 1.2859 | 0.0056 |
| 257 | Q9Z210 | Mitochondrial proton/calcium exchanger protein                                | Letm1     | 1.2846 | 0.0056 |
| 258 | Q60780 | Growth arrest-specific protein 7                                              | Gas7      | 1.2826 | 0.0057 |
| 259 | O54829 | Regulator of G-protein signaling 7                                            | Rgs7      | 1.2815 | 0.0057 |
| 260 | B9EJ80 | PDZ domain-containing protein 8                                               | Pdzd8     | 1.2812 | 0.0057 |
| 261 | P54285 | Voltage-dependent L-type calcium channel subunit beta-3                       | Cacnb3    | 1.2785 | 0.0057 |
| 262 | Q62172 | RalA-binding protein 1                                                        | Ralbp1    | 1.2764 | 0.0057 |
| 263 | P07934 | Phosphorylase b kinase gamma catalytic chain skeletal muscle/heart isoform    | Phkg1     | 1.2734 | 0.0058 |
| 264 | P40124 | Adenylyl cyclase-associated protein 1                                         | Cap1      | 1.2710 | 0.0058 |
| 265 | Q02357 | Ankyrin-1                                                                     | Ank1      | 1.2707 | 0.0058 |
| 266 | Q9CZC8 | Secernin-1                                                                    | Scrn1     | 1.2684 | 0.0059 |
| 267 | Q80YF9 | Rho GTPase-activating protein 33                                              | Arhgap33  | 1.2665 | 0.0060 |
| 268 | P27659 | 60S ribosomal protein L3                                                      | Rpl3      | 1.2654 | 0.0060 |
| 269 | Q61161 | Mitogen-activated protein kinase kinase kinase kinase 2                       | Map4k2    | 1.2635 | 0.0060 |
| 270 | O70551 | SRSF protein kinase 1                                                         | Srpk1     | 1.2635 | 0.0060 |
| 271 | Q7TSH4 | Centriolar coiled-coil protein of 110 kDa                                     | Ccp110    | 1.2635 | 0.0060 |
| 272 | Q99LH2 | Phosphatidylserine synthase 1                                                 | Ptdss1    | 1.2635 | 0.0060 |
| 273 | Q80SY6 | Adenosine deaminase-like protein                                              | Adal      | 1.2635 | 0.0060 |
| 274 | Q61324 | Aryl hydrocarbon receptor nuclear translocator 2                              | Arnt2     | 1.2635 | 0.0060 |
| 275 | Q6A058 | Armadillo repeat-containing X-linked protein 2                                | Armxc2    | 1.2635 | 0.0060 |
| 276 | Q8K4P0 | pre-mRNA 3' end processing protein WDR33                                      | Wdr33     | 1.2635 | 0.0060 |
| 277 | Q8R216 | NAD-dependent protein lipoamidase sirtuin-4 mitochondrial                     | Sirt4     | 1.2635 | 0.0060 |
| 278 | P37242 | Thyroid hormone receptor beta                                                 | Thrb      | 1.2635 | 0.0060 |
| 279 | Q91VB2 | Calcium/calmodulin-dependent protein kinase type 1G                           | Camk1g    | 1.2635 | 0.0060 |
| 280 | Q3U3E2 | Protein FAM117B                                                               | Fam117b   | 1.2635 | 0.0060 |
| 281 | Q60603 | Potassium voltage-gated channel subfamily H member 1                          | Kcnh1     | 1.2635 | 0.0060 |
| 282 | Q64735 | Complement component receptor 1-like protein                                  | Cr1l      | 1.2617 | 0.0060 |
| 283 | Q80XS7 | Protein FAM83E                                                                | Fam83e    | 1.2608 | 0.0060 |
| 284 | Q9DCS3 | Enoyl-[acyl-carrier-protein] reductase mitochondrial                          | Mecr      | 1.2595 | 0.0061 |
| 285 | Q9WTX2 | Interferon-inducible double-stranded RNA-dependent protein kinase activator A | Prkra     | 1.2575 | 0.0062 |
| 286 | Q8VD65 | Phosphoinositide 3-kinase regulatory subunit 4                                | Pik3r4    | 1.2541 | 0.0062 |
| 287 | Q8CGP5 | Histone H2A type 1-F                                                          | Hist1h2af | 1.2535 | 0.0062 |
| 288 | Q8CGP6 | Histone H2A type 1-H                                                          | H2ac12    | 1.2535 | 0.0062 |
| 289 | COHKE8 | Histone H2A type 1-O                                                          | Hist1h2ao | 1.2535 | 0.0062 |
| 290 | COHKE4 | Histone H2A type 1-E                                                          | H2ac8     | 1.2535 | 0.0062 |
| 291 | COHKE2 | Histone H2A type 1-C                                                          | H2ac6     | 1.2535 | 0.0062 |
| 292 | COHKE1 | Histone H2A type 1-B                                                          | H2ac4     | 1.2535 | 0.0062 |
| 293 | COHKE9 | Histone H2A type 1-P                                                          | Hist1h2ap | 1.2535 | 0.0062 |
| 294 | COHKE3 | Histone H2A type 1-D                                                          | H2ac7     | 1.2535 | 0.0062 |
| 295 | Q8BFU2 | Histone H2A type 3                                                            | H2aw      | 1.2535 | 0.0062 |
| 296 | COHKE5 | Histone H2A type 1-G                                                          | H2ac11    | 1.2535 | 0.0062 |
| 297 | COHKE6 | Histone H2A type 1-I                                                          | H2ac13    | 1.2535 | 0.0062 |
| 298 | COHKE7 | Histone H2A type 1-N                                                          | Hist1h2an | 1.2535 | 0.0062 |
| 299 | Q8CGP7 | Histone H2A type 1-K                                                          | H2ac15    | 1.2535 | 0.0062 |
| 300 | Q8BYM8 | Probable cysteine--tRNA ligase mitochondrial                                  | Cars2     | 1.2526 | 0.0063 |
| 301 | Q02819 | Nucleobindin-1                                                                | Nucb1     | 1.2526 | 0.0063 |
| 302 | Q8BVQ5 | Protein phosphatase methylesterase 1                                          | Ppme1     | 1.2526 | 0.0063 |
| 303 | Q9QXB9 | Developmentally-regulated GTP-binding protein 2                               | Drg2      | 1.2461 | 0.0063 |
| 304 | A2ADY9 | Protein DDI1 homolog 2                                                        | Ddi2      | 1.2440 | 0.0064 |
| 305 | Q9JJ43 | RNA binding protein fox-1 homolog 1                                           | Rbfox1    | 1.2440 | 0.0064 |
| 306 | Q80UG5 | Septin-9                                                                      | Septin9   | 1.2401 | 0.0065 |
| 307 | Q80TL4 | PHD finger protein 24                                                         | Phf24     | 1.2373 | 0.0065 |
| 308 | Q8VDP4 | Cell cycle and apoptosis regulator protein 2                                  | Ccar2     | 1.2343 | 0.0065 |
| 309 | P53811 | Phosphatidylinositol transfer protein beta isoform                            | Pitpnb    | 1.2340 | 0.0065 |
| 310 | Q8K310 | Matrin-3                                                                      | Matr3     | 1.2312 | 0.0066 |
| 311 | Q64524 | Histone H2B type 2-E                                                          | H2bc21    | 1.2269 | 0.0067 |
| 312 | Q9EPE9 | Endoplasmic reticulum transmembrane helix translocase                         | Atp13a1   | 1.2241 | 0.0067 |
| 313 | Q8R0A7 | Uncharacterized protein KIAA0513                                              | Kiaa0513  | 1.2234 | 0.0067 |
| 314 | Q9R1V6 | Disintegrin and metalloproteinase domain-containing protein 22                | Adam22    | 1.2211 | 0.0068 |
| 315 | Q3UXZ6 | Protein FAM81A                                                                | Fam81a    | 1.2207 | 0.0068 |
| 316 | Q8R574 | Phosphoribosyl pyrophosphate synthase-associated protein 2                    | Prpsap2   | 1.2183 | 0.0069 |
| 317 | Q8CGK7 | Guanine nucleotide-binding protein G(olf) subunit alpha                       | Gnal      | 1.2181 | 0.0069 |
| 318 | P15116 | Cadherin-2                                                                    | Cdh2      | 1.2180 | 0.0069 |

|     |        |                                                                            |          |        |        |
|-----|--------|----------------------------------------------------------------------------|----------|--------|--------|
| 319 | Q8CBF3 | Ephrin type-B receptor 1                                                   | Ephb1    | 1.2175 | 0.0069 |
| 320 | Q6ZQ58 | La-related protein 1                                                       | Larp1    | 1.2078 | 0.0072 |
| 321 | E9Q7G0 | Nuclear mitotic apparatus protein 1                                        | Numa1    | 1.2071 | 0.0072 |
| 322 | Q9Z2E1 | Methyl-CpG-binding domain protein 2                                        | Mbd2     | 1.2028 | 0.0073 |
| 323 | Q8CGQ8 | Sodium/potassium/calcium exchanger 4                                       | Slc24a4  | 1.2028 | 0.0073 |
| 324 | Q9EPW0 | Inositol polyphosphate-4-phosphatase type I A                              | Inpp4a   | 1.2017 | 0.0073 |
| 325 | Q61329 | Zinc finger homeobox protein 3                                             | Zfhx3    | 1.1979 | 0.0074 |
| 326 | Q9R0L6 | Pericentriolar material 1 protein                                          | Pcm1     | 1.1953 | 0.0075 |
| 327 | Q68FE2 | Autophagy-related protein 9A                                               | Atg9a    | 1.1953 | 0.0075 |
| 328 | Q8K004 | Spermatogenesis-associated protein 2                                       | Spata2   | 1.1946 | 0.0075 |
| 329 | Q6PEE2 | CBP80/20-dependent translation initiation factor                           | Ctif     | 1.1946 | 0.0075 |
| 330 | Q9D706 | RNA polymerase II-associated protein 3                                     | Rpap3    | 1.1946 | 0.0075 |
| 331 | Q3UY34 | Protein CUST                                                               | Custos   | 1.1946 | 0.0075 |
| 332 | Q8VEG4 | Exonuclease 3'-5' domain-containing protein 2                              | Exd2     | 1.1946 | 0.0075 |
| 333 | Q91YT0 | NADH dehydrogenase [ubiquinone] flavoprotein 1 mitochondrial               | Ndufv1   | 1.1932 | 0.0075 |
| 334 | P80317 | T-complex protein 1 subunit zeta                                           | Cct6a    | 1.1921 | 0.0075 |
| 335 | O55222 | Integrin-linked protein kinase                                             | Ilk      | 1.1910 | 0.0075 |
| 336 | P30275 | Creatine kinase U-type mitochondrial                                       | Ckmt1    | 1.1907 | 0.0076 |
| 337 | Q91M76 | Actin-related protein 2/3 complex subunit 3                                | Arpc3    | 1.1886 | 0.0076 |
| 338 | Q7TSH8 | Transmembrane protein 94                                                   | Tmem94   | 1.1877 | 0.0076 |
| 339 | A2ARP1 | Inositol hexakisphosphate and diphosphoinositol-pentakisphosphate kinase 1 | Ppip5k1  | 1.1873 | 0.0078 |
| 340 | Q9WUA5 | Laforin                                                                    | Epm2a    | 1.1873 | 0.0078 |
| 341 | Q61137 | Astrotactin-1                                                              | Astn1    | 1.1851 | 0.0079 |
| 342 | Q3U0V1 | Far upstream element-binding protein 2                                     | Khsrp    | 1.1808 | 0.0079 |
| 343 | Q9WUA3 | ATP-dependent 6-phosphofructokinase platelet type                          | Pfkp     | 1.1760 | 0.0081 |
| 344 | Q6P5E4 | UDP-glucose:glycoprotein glucosyltransferase 1                             | Ugg1     | 1.1667 | 0.0092 |
| 345 | O70481 | E3 ubiquitin-protein ligase UBR1                                           | Ubr1     | 1.1659 | 0.0092 |
| 346 | Q9WTR1 | Transient receptor potential cation channel subfamily V member 2           | Trpv2    | 1.1655 | 0.0092 |
| 347 | Q9Z1N5 | Spliceosome RNA helicase Ddx39b                                            | Ddx39b   | 1.1618 | 0.0093 |
| 348 | P51660 | Peroxisomal multifunctional enzyme type 2                                  | Hsd17b4  | 1.1618 | 0.0093 |
| 349 | P63034 | Cytohesin-2                                                                | Cyth2    | 1.1601 | 0.0094 |
| 350 | Q9Z2H2 | Regulator of G-protein signaling 6                                         | Rgs6     | 1.1600 | 0.0094 |
| 351 | P28650 | Adenylosuccinate synthetase isozyme 1                                      | Adss1    | 1.1574 | 0.0094 |
| 352 | Q8BKX6 | Serine/threonine-protein kinase SMG1                                       | Smg1     | 1.1559 | 0.0094 |
| 353 | P61620 | Protein transport protein Sec61 subunit alpha isoform 1                    | Sec61a1  | 1.1559 | 0.0094 |
| 354 | Q8BWT5 | Disco-interacting protein 2 homolog A                                      | Dip2a    | 1.1556 | 0.0095 |
| 355 | Q69Z98 | Serine/threonine-protein kinase BRSK2                                      | Brsk2    | 1.1552 | 0.0095 |
| 356 | Q9D7N9 | Adipocyte plasma membrane-associated protein                               | Apmap    | 1.1545 | 0.0095 |
| 357 | Q6PHS6 | Sorting nexin-13                                                           | Snx13    | 1.1535 | 0.0095 |
| 358 | Q9D773 | 39S ribosomal protein L2 mitochondrial                                     | Mirpl2   | 1.1502 | 0.0096 |
| 359 | Q91VL8 | Telomeric repeat-binding factor 2-interacting protein 1                    | Terf2ip  | 1.1486 | 0.0096 |
| 360 | Q8VIJ8 | GATOR complex protein NPRL3                                                | Nprl3    | 1.1486 | 0.0096 |
| 361 | Q62203 | Splicing factor 3A subunit 2                                               | Sf3a2    | 1.1486 | 0.0096 |
| 362 | P55144 | Tyrosine-protein kinase receptor TYRO3                                     | Tyro3    | 1.1486 | 0.0096 |
| 363 | Q6IEE6 | Transmembrane protein 132E                                                 | Tmem132e | 1.1486 | 0.0096 |
| 364 | Q99PI5 | Phosphatidate phosphatase LPIN2                                            | Lpin2    | 1.1486 | 0.0096 |
| 365 | Q8BKE9 | Intraflagellar transport protein 74 homolog                                | Ift74    | 1.1486 | 0.0096 |
| 366 | Q6PAL7 | AT-hook DNA-binding motif-containing protein 1                             | Ahdc1    | 1.1486 | 0.0096 |
| 367 | Q9CXG3 | Peptidyl-prolyl cis-trans isomerase-like 4                                 | Ppil4    | 1.1486 | 0.0096 |
| 368 | Q8VEM1 | E3 ubiquitin-protein ligase RNF130                                         | Rnf130   | 1.1486 | 0.0096 |
| 369 | D3Z4I3 | RNA-binding protein 24                                                     | Rbm24    | 1.1486 | 0.0096 |
| 370 | Q62176 | RNA-binding protein 38                                                     | Rbm38    | 1.1486 | 0.0096 |
| 371 | Q8VDG3 | Poly(A)-specific ribonuclease PARN                                         | Parn     | 1.1486 | 0.0096 |
| 372 | Q6PDX6 | E3 ubiquitin-protein ligase Rnf220                                         | Rnf220   | 1.1486 | 0.0096 |
| 373 | Q9JIL5 | Tubby-related protein 4                                                    | Tulp4    | 1.1486 | 0.0096 |
| 374 | A2AQ19 | RNA polymerase-associated protein RTF1 homolog                             | Rtf1     | 1.1486 | 0.0096 |
| 375 | O70401 | Tetraspanin-6                                                              | Tspan6   | 1.1486 | 0.0096 |
| 376 | Q4VC33 | E3 ubiquitin-protein transferase MAEA                                      | Maea     | 1.1486 | 0.0096 |
| 377 | Q60949 | TBC1 domain family member 1                                                | Tbc1d1   | 1.1486 | 0.0096 |
| 378 | Q9DAX9 | Amyloid protein-binding protein 2                                          | Appbp2   | 1.1486 | 0.0096 |
| 379 | Q9JIB4 | General transcription factor IIH subunit 2                                 | Gtf2h2   | 1.1486 | 0.0096 |
| 380 | Q9R171 | Cerebellin-1                                                               | Cbln1    | 1.1486 | 0.0096 |
| 381 | Q8BGU2 | Cerebellin-2                                                               | Cbln2    | 1.1486 | 0.0096 |
| 382 | Q80U38 | Protein KHNYN                                                              | Khny1    | 1.1486 | 0.0096 |

|     |        |                                                                     |          |        |        |
|-----|--------|---------------------------------------------------------------------|----------|--------|--------|
| 383 | P97799 | Neurensin-1                                                         | Nrsn1    | 1.1486 | 0.0096 |
| 384 | O70281 | Protein-tyrosine sulfotransferase 1                                 | Tpst1    | 1.1486 | 0.0096 |
| 385 | Q8BZ81 | Leucine-rich repeat transmembrane neuronal protein 3                | Lrrtm3   | 1.1486 | 0.0096 |
| 386 | P35822 | Receptor-type tyrosine-protein phosphatase kappa                    | Ptprk    | 1.1486 | 0.0096 |
| 387 | Q9Z160 | Conserved oligomeric Golgi complex subunit 1                        | Cog1     | 1.1486 | 0.0096 |
| 388 | Q8VI93 | 2'-5'-oligoadenylate synthase 3                                     | Oas3     | 1.1486 | 0.0096 |
| 389 | P59644 | Phosphatidylinositol 4 5-bisphosphate 5-phosphatase A               | Inpp5j   | 1.1470 | 0.0097 |
| 390 | Q9D554 | Splicing factor 3A subunit 3                                        | Sf3a3    | 1.1423 | 0.0098 |
| 391 | Q3U2P1 | Protein transport protein Sec24A                                    | Sec24a   | 1.1412 | 0.0099 |
| 392 | Q8R4U6 | DNA topoisomerase I mitochondrial                                   | Top1mt   | 1.1412 | 0.0099 |
| 393 | O08842 | GDNF family receptor alpha-2                                        | Gfra2    | 1.1408 | 0.0099 |
| 394 | Q00560 | Interleukin-6 receptor subunit beta                                 | Il6st    | 1.1408 | 0.0099 |
| 395 | P70195 | Proteasome subunit beta type-7                                      | Psmb7    | 1.1408 | 0.0099 |
| 396 | P22315 | Ferrochelatase mitochondrial                                        | Fech     | 1.1402 | 0.0099 |
| 397 | Q3UHC7 | Disabled homolog 2-interacting protein                              | Dab2ip   | 1.1402 | 0.0099 |
| 398 | P62743 | AP-2 complex subunit sigma                                          | Ap2s1    | 1.1391 | 0.0100 |
| 399 | Q6PDG5 | SWI/SNF complex subunit SMARCC2                                     | Smarcc2  | 1.1382 | 0.0100 |
| 400 | P40142 | Transketolase                                                       | Tkt      | 1.1379 | 0.0100 |
| 401 | Q9Z127 | Large neutral amino acids transporter small subunit 1               | Slc7a5   | 1.1364 | 0.0100 |
| 402 | P36552 | Oxygen-dependent coproporphyrinogen-III oxidase mitochondrial       | Cpox     | 1.1301 | 0.0102 |
| 403 | Q99KJ8 | Dynactin subunit 2                                                  | Dctn2    | 1.1262 | 0.0102 |
| 404 | O70585 | Dystrobrevin beta                                                   | Dtnb     | 1.1217 | 0.0106 |
| 405 | Q9CYI4 | Putative RNA-binding protein Luc7-like 1                            | Luc7l    | 1.1185 | 0.0108 |
| 406 | Q9EQ20 | Methylmalonate-semialdehyde dehydrogenase [acylating] mitochondrial | Aldh6a1  | 1.1184 | 0.0108 |
| 407 | Q9EQH2 | Endoplasmic reticulum aminopeptidase 1                              | Erap1    | 1.1153 | 0.0109 |
| 408 | Q8R3H7 | Heparan sulfate 2-O-sulfotransferase 1                              | Hs2st1   | 1.1153 | 0.0109 |
| 409 | Q8K296 | Myotubularin-related protein 3                                      | Mtmr3    | 1.1153 | 0.0109 |
| 410 | Q62132 | Receptor-type tyrosine-protein phosphatase R                        | Ptpr     | 1.1153 | 0.0109 |
| 411 | Q9R008 | Mevalonate kinase                                                   | Mvk      | 1.1151 | 0.0109 |
| 412 | Q9ERB0 | Synaptosomal-associated protein 29                                  | Snap29   | 1.1151 | 0.0109 |
| 413 | Q3U186 | Probable arginine--tRNA ligase mitochondrial                        | Rars2    | 1.1151 | 0.0109 |
| 414 | Q99PJ0 | Neurotrimin                                                         | Ntm      | 1.1133 | 0.0109 |
| 415 | Q3TDK6 | Protein rogdi homolog                                               | Rogdi    | 1.1133 | 0.0109 |
| 416 | Q64487 | Receptor-type tyrosine-protein phosphatase delta                    | Ptprd    | 1.1123 | 0.0109 |
| 417 | Q61655 | ATP-dependent RNA helicase DDX19A                                   | Ddx19a   | 1.1117 | 0.0110 |
| 418 | Q99MR3 | Solute carrier family 12 member 9                                   | Slc12a9  | 1.1117 | 0.0110 |
| 419 | Q9D5V6 | Synapse-associated protein 1                                        | Syap1    | 1.1116 | 0.0110 |
| 420 | P41234 | ATP-binding cassette sub-family A member 2                          | Abca2    | 1.1099 | 0.0111 |
| 421 | Q9ET54 | Palladin                                                            | Palld    | 1.1091 | 0.0111 |
| 422 | P01831 | Thy-1 membrane glycoprotein                                         | Thy1     | 1.1081 | 0.0112 |
| 423 | Q04736 | Tyrosine-protein kinase Yes                                         | Yes1     | 1.1077 | 0.0112 |
| 424 | Q91YM2 | Rho GTPase-activating protein 35                                    | Arhgap35 | 1.1030 | 0.0113 |
| 425 | Q8R2Y0 | Monoacylglycerol lipase ABHD6                                       | Abhd6    | 1.0986 | 0.0128 |
| 426 | Q9JHW9 | Aldehyde dehydrogenase family 1 member A3                           | Aldh1a3  | 1.0975 | 0.0129 |
| 427 | Q2TPA8 | Hydroxysteroid dehydrogenase-like protein 2                         | Hsd12    | 1.0963 | 0.0130 |
| 428 | O88829 | Lactosylceramide alpha-2 3-sialyltransferase                        | St3gal5  | 1.0941 | 0.0131 |
| 429 | Q9D6W8 | BLOC-1-related complex subunit 6                                    | Borcs6   | 1.0941 | 0.0131 |
| 430 | Q6PDL0 | Cytoplasmic dynein 1 light intermediate chain 2                     | Dync1li2 | 1.0938 | 0.0131 |
| 431 | Q9QYB1 | Chloride intracellular channel protein 4                            | Clic4    | 1.0907 | 0.0132 |
| 432 | P07903 | DNA excision repair protein ERCC-1                                  | Erc1     | 1.0853 | 0.0133 |
| 433 | Q6DID3 | SR-related and CTD-associated factor 8                              | Scaf8    | 1.0853 | 0.0133 |
| 434 | Q8BSK8 | Ribosomal protein S6 kinase beta-1                                  | Rps6kb1  | 1.0831 | 0.0134 |
| 435 | P70677 | Caspase-3                                                           | Casp3    | 1.0802 | 0.0135 |
| 436 | Q9QYG0 | Protein NDRG2                                                       | Ndr2     | 1.0761 | 0.0136 |
| 437 | Q01147 | Cyclic AMP-responsive element-binding protein 1                     | Creb1    | 1.0755 | 0.0136 |
| 438 | Q5EBH1 | Ras association domain-containing protein 5                         | Rassf5   | 1.0755 | 0.0136 |
| 439 | Q0KK59 | Protein unc-79 homolog                                              | Unc79    | 1.0755 | 0.0136 |
| 440 | Q3TBW2 | 39S ribosomal protein L10 mitochondrial                             | Mrpl10   | 1.0755 | 0.0136 |
| 441 | Q9CWS0 | N(G) N(G)-dimethylarginine dimethylaminohydrolase 1                 | Ddah1    | 1.0750 | 0.0136 |
| 442 | Q68SA9 | A disintegrin and metalloproteinase with thrombospondin motifs 7    | Adamts7  | 1.0744 | 0.0137 |
| 443 | O55091 | Protein IMPACT                                                      | Impact   | 1.0739 | 0.0137 |
| 444 | Q6V455 | Protein sidekick-2                                                  | Sdk2     | 1.0732 | 0.0137 |
| 445 | Q91YM4 | FAST kinase domain-containing protein 4                             | Tbr4     | 1.0731 | 0.0137 |
| 446 | Q9CXR1 | Dehydrogenase/reductase SDR family member 7                         | Dhrs7    | 1.0731 | 0.0137 |

|     |        |                                                                                               |         |        |        |
|-----|--------|-----------------------------------------------------------------------------------------------|---------|--------|--------|
| 447 | Q8R3Z5 | Voltage-dependent L-type calcium channel subunit beta-1                                       | Cacnb1  | 1.0699 | 0.0138 |
| 448 | O54833 | Casein kinase II subunit alpha'                                                               | Csnk2a2 | 1.0677 | 0.0139 |
| 449 | Q8BM13 | Noelin-2                                                                                      | Olfm2   | 1.0675 | 0.0139 |
| 450 | Q8R2V3 | Zinc finger protein 445                                                                       | Znf445  | 1.0675 | 0.0139 |
| 451 | Q68FL4 | Putative adenosylhomocysteinase 3                                                             | Ahcy12  | 1.0659 | 0.0140 |
| 452 | Q9D0L8 | mRNA cap guanine-N7 methyltransferase                                                         | Rnmt    | 1.0651 | 0.0140 |
| 453 | O35226 | 26S proteasome non-ATPase regulatory subunit 4                                                | Psm4    | 1.0603 | 0.0143 |
| 454 | Q9WTM5 | RuvB-like 2                                                                                   | Ruvbl2  | 1.0591 | 0.0144 |
| 455 | Q91ZX7 | Prolow-density lipoprotein receptor-related protein 1                                         | Lrp1    | 1.0579 | 0.0144 |
| 456 | Q6PE01 | U5 small nuclear ribonucleoprotein 40 kDa protein                                             | Snrnp40 | 1.0563 | 0.0144 |
| 457 | Q0P5W1 | Vacuolar protein sorting-associated protein 8 homolog                                         | Vps8    | 1.0557 | 0.0145 |
| 458 | Q61194 | Phosphatidylinositol 4-phosphate 3-kinase C2 domain-containing subunit alpha                  | Pik3c2a | 1.0556 | 0.0145 |
| 459 | O35075 | Vacuolar protein sorting-associated protein 26C                                               | Vps26c  | 1.0556 | 0.0145 |
| 460 | Q9CXY9 | GPI-anchor transamidase                                                                       | Pigk    | 1.0556 | 0.0145 |
| 461 | Q3UHD3 | Microtubule-associated tumor suppressor candidate 2 homolog                                   | Mtus2   | 1.0556 | 0.0145 |
| 462 | O70174 | Neuronal acetylcholine receptor subunit alpha-4                                               | Chrna4  | 1.0556 | 0.0145 |
| 463 | Q9D3D0 | Alpha-tocopherol transfer protein-like                                                        | Ttpal   | 1.0556 | 0.0145 |
| 464 | Q810C1 | SLIT and NTRK-like protein 1                                                                  | Slitrk1 | 1.0556 | 0.0145 |
| 465 | Q8K0S5 | Reticulon-4 receptor-like 1                                                                   | Rtn4r1  | 1.0556 | 0.0145 |
| 466 | Q640M6 | Glycerophosphodiester phosphodiesterase domain-containing protein 5                           | Gdpd5   | 1.0556 | 0.0145 |
| 467 | Q9JIK5 | Nucleolar RNA helicase 2                                                                      | Ddx21   | 1.0556 | 0.0145 |
| 468 | Q91Y63 | Solute carrier family 13 member 3                                                             | Slc13a3 | 1.0556 | 0.0145 |
| 469 | O54836 | Zinc finger matrin-type protein 3                                                             | Zmat3   | 1.0556 | 0.0145 |
| 470 | Q8BG30 | Negative elongation factor A                                                                  | Nelfa   | 1.0556 | 0.0145 |
| 471 | Q6ZQA6 | Immunoglobulin superfamily member 3                                                           | Igsf3   | 1.0556 | 0.0145 |
| 472 | Q8VCQ3 | Nuclear receptor-binding factor 2                                                             | Nrbf2   | 1.0556 | 0.0145 |
| 473 | Q922K7 | Probable 28S rRNA (cytosine-C(5))-methyltransferase                                           | Nop2    | 1.0556 | 0.0145 |
| 474 | Q8CFE2 | Histone PARylation factor 1                                                                   | Hpf1    | 1.0556 | 0.0145 |
| 475 | Q91VW5 | Golgin subfamily A member 4                                                                   | Golga4  | 1.0556 | 0.0145 |
| 476 | Q3UGF1 | WD repeat-containing protein 19                                                               | Wdr19   | 1.0556 | 0.0145 |
| 477 | Q3UU35 | Ovostatin homolog                                                                             | Ovos    | 1.0556 | 0.0145 |
| 478 | Q9EQB9 | Zinc finger protein 287                                                                       | Znf287  | 1.0556 | 0.0145 |
| 479 | P08074 | Carbonyl reductase [NADPH] 2                                                                  | Cbr2    | 1.0556 | 0.0145 |
| 480 | P22933 | Gamma-aminobutyric acid receptor subunit delta                                                | Gabbrd  | 1.0556 | 0.0145 |
| 481 | Q9QY40 | Plexin-B3                                                                                     | Plxnb3  | 1.0549 | 0.0145 |
| 482 | Q9EPR4 | Solute carrier family 23 member 2                                                             | Slc23a2 | 1.0538 | 0.0146 |
| 483 | Q6A009 | E3 ubiquitin-protein ligase listerin                                                          | Ltn1    | 1.0488 | 0.0151 |
| 484 | Q3UHD6 | Sorting nexin-27                                                                              | Snx27   | 1.0484 | 0.0151 |
| 485 | Q1HFZ0 | RNA cytosine C(5)-methyltransferase NSUN2                                                     | Nsun2   | 1.0480 | 0.0152 |
| 486 | Q64511 | DNA topoisomerase 2-beta                                                                      | Top2b   | 1.0478 | 0.0152 |
| 487 | P97789 | 5'-3' exoribonuclease 1                                                                       | Xrn1    | 1.0477 | 0.0152 |
| 488 | P21956 | Lactadherin                                                                                   | Mfge8   | 1.0425 | 0.0154 |
| 489 | Q8C4Y3 | Negative elongation factor B                                                                  | Nelfb   | 1.0425 | 0.0154 |
| 490 | Q61466 | SWI/SNF-related matrix-associated actin-dependent regulator of chromatin subfamily D member 1 | Smardc1 | 1.0421 | 0.0154 |
| 491 | Q8CB44 | GRAM domain-containing protein 4                                                              | Gramd4  | 1.0421 | 0.0154 |
| 492 | Q8BYL4 | Tyrosine--tRNA ligase mitochondrial                                                           | Yars2   | 1.0421 | 0.0154 |
| 493 | Q9CQT1 | Methylthioribose-1-phosphate isomerase                                                        | Mri1    | 1.0372 | 0.0158 |
| 494 | Q3TWN3 | Metal transporter CNNM2                                                                       | Cnm2    | 1.0372 | 0.0158 |
| 495 | Q9Z108 | Double-stranded RNA-binding protein Staufen homolog 1                                         | Stau1   | 1.0372 | 0.0158 |
| 496 | Q9ESJ4 | NCK-interacting protein with SH3 domain                                                       | Nckipsd | 1.0368 | 0.0158 |
| 497 | O35926 | Cyclin-dependent kinase 5 activator 2                                                         | Cdk5r2  | 1.0362 | 0.0158 |
| 498 | Q6P9K8 | Caskin-1                                                                                      | Caskin1 | 1.0355 | 0.0158 |
| 499 | Q62077 | 1-phosphatidylinositol 4 5-bisphosphate phosphodiesterase gamma-1                             | Plcg1   | 1.0348 | 0.0158 |
| 500 | P48318 | Glutamate decarboxylase 1                                                                     | Gad1    | 1.0348 | 0.0158 |
| 501 | Q63912 | Oligodendrocyte-myelin glycoprotein                                                           | Omg     | 1.0343 | 0.0159 |
| 502 | Q60575 | Kinesin-like protein KIF1B                                                                    | Kif1b   | 1.0320 | 0.0159 |
| 503 | P50580 | Proliferation-associated protein 2G4                                                          | Pa2g4   | 1.0304 | 0.0160 |
| 504 | Q9D8X2 | Coiled-coil domain-containing protein 124                                                     | Ccdc124 | 1.0252 | 0.0163 |
| 505 | Q8JZS0 | Protein lin-7 homolog A                                                                       | Lin7a   | 1.0246 | 0.0163 |
| 506 | Q9JJC6 | RILP-like protein 1                                                                           | Rilpl1  | 1.0238 | 0.0163 |
| 507 | P54822 | Adenylosuccinate lyase                                                                        | Adsl    | 1.0232 | 0.0166 |
| 508 | Q9CT10 | Ran-binding protein 3                                                                         | Ranbp3  | 1.0205 | 0.0167 |
| 509 | Q99LC3 | NADH dehydrogenase [ubiquinone] 1 alpha subcomplex subunit 10 mitochondrial                   | Ndufa10 | 1.0196 | 0.0167 |
| 510 | Q8BLY3 | Leucine-rich repeat and fibronectin type-III domain-containing protein 3                      | Lfn3    | 1.0118 | 0.0171 |

|     |        |                                                                              |          |        |        |
|-----|--------|------------------------------------------------------------------------------|----------|--------|--------|
| 511 | Q9QZE7 | Translin-associated protein X                                                | Tsnax    | 1.0074 | 0.0173 |
| 512 | Q9CXW4 | 60S ribosomal protein L11                                                    | Rpl11    | 1.0074 | 0.0173 |
| 513 | Q99LB2 | Dehydrogenase/reductase SDR family member 4                                  | Dhrs4    | 1.0053 | 0.0175 |
| 514 | Q99J77 | Sialic acid synthase                                                         | Nans     | 1.0041 | 0.0176 |
| 515 | Q9Z0S1 | 3'(2') 5'-bisphosphate nucleotidase 1                                        | Bpnt1    | 1.0038 | 0.0177 |
| 516 | P38060 | Hydroxymethylglutaryl-CoA lyase mitochondrial                                | Hmgcl    | 1.0021 | 0.0177 |
| 517 | Q9ER73 | Elongator complex protein 4                                                  | Elp4     | 0.9997 | 0.0178 |
| 518 | Q9WV02 | RNA-binding motif protein X chromosome                                       | Rbmx     | 0.9982 | 0.0178 |
| 519 | Q8VE33 | Ganglioside-induced differentiation-associated protein 1-like 1              | Gdap11   | 0.9975 | 0.0179 |
| 520 | Q9CQ10 | Charged multivesicular body protein 3                                        | Chmp3    | 0.9964 | 0.0179 |
| 521 | Q9D6Z1 | Nucleolar protein 56                                                         | Nop56    | 0.9963 | 0.0179 |
| 522 | Q5U458 | DnaJ homolog subfamily C member 11                                           | Dnajc11  | 0.9958 | 0.0179 |
| 523 | Q8BH95 | Enoyl-CoA hydratase mitochondrial                                            | Echs1    | 0.9949 | 0.0180 |
| 524 | Q8BGN3 | Glycerophosphocholine cholinephosphodiesterase ENPP6                         | Enpp6    | 0.9944 | 0.0180 |
| 525 | Q9CY64 | Biliverdin reductase A                                                       | Blvra    | 0.9943 | 0.0180 |
| 526 | P50149 | Guanine nucleotide-binding protein G(t) subunit alpha-2                      | Gnat2    | 0.9939 | 0.0180 |
| 527 | P18872 | Guanine nucleotide-binding protein G(o) subunit alpha                        | Gnao1    | 0.9924 | 0.0181 |
| 528 | Q04447 | Creatine kinase B-type                                                       | Ckb      | 0.9924 | 0.0181 |
| 529 | Q66JT5 | Tubulin polyglutamylase complex subunit 2                                    | Tpgs2    | 0.9920 | 0.0182 |
| 530 | P23242 | Gap junction alpha-1 protein                                                 | Gja1     | 0.9887 | 0.0183 |
| 531 | Q8BZ05 | Arf-GAP with Rho-GAP domain ANK repeat and PH domain-containing protein 2    | Arap2    | 0.9868 | 0.0185 |
| 532 | Q9ET80 | Junctophilin-1                                                               | Jph1     | 0.9868 | 0.0185 |
| 533 | Q80XD1 | Beta-chimaerin                                                               | Chn2     | 0.9868 | 0.0185 |
| 534 | Q9D8P4 | 39S ribosomal protein L17 mitochondrial                                      | Mrpl17   | 0.9868 | 0.0185 |
| 535 | A2A432 | Cullin-4B                                                                    | Cul4b    | 0.9861 | 0.0186 |
| 536 | Q9CSU0 | Regulation of nuclear pre-mRNA domain-containing protein 1B                  | Rprd1b   | 0.9815 | 0.0188 |
| 537 | P68181 | cAMP-dependent protein kinase catalytic subunit beta                         | Prkacb   | 0.9802 | 0.0188 |
| 538 | Q8CCS6 | Polyadenylate-binding protein 2                                              | Pabpn1   | 0.9789 | 0.0189 |
| 539 | Q99JW2 | Aminoacylase-1                                                               | Acy1     | 0.9767 | 0.0190 |
| 540 | Q6NS60 | F-box only protein 41                                                        | Fbxo41   | 0.9757 | 0.0191 |
| 541 | Q505F5 | Leucine-rich repeat-containing protein 47                                    | Lrrc47   | 0.9740 | 0.0191 |
| 542 | Q810J8 | Zinc finger FYVE domain-containing protein 1                                 | Zfyve1   | 0.9734 | 0.0192 |
| 543 | Q9QX11 | Cytohesin-1                                                                  | Cyth1    | 0.9716 | 0.0210 |
| 544 | Q8CH77 | Neuron navigator 1                                                           | Nav1     | 0.9709 | 0.0210 |
| 545 | Q9WTS5 | Teneurin-2                                                                   | Tenm2    | 0.9699 | 0.0211 |
| 546 | Q9CRC8 | Leucine-rich repeat-containing protein 40                                    | Lrrc40   | 0.9664 | 0.0216 |
| 547 | A2AQP0 | Myosin-7B                                                                    | Myh7b    | 0.9661 | 0.0216 |
| 548 | Q8BHA3 | D-aminoacyl-tRNA deacylase 2                                                 | Dtd2     | 0.9655 | 0.0217 |
| 549 | Q9DAW6 | U4/U6 small nuclear ribonucleoprotein Prp4                                   | Prpf4    | 0.9648 | 0.0217 |
| 550 | Q3TDQ1 | Dolichyl-diphosphooligosaccharide--protein glycosyltransferase subunit STT3B | Stt3b    | 0.9638 | 0.0219 |
| 551 | P46097 | Synaptotagmin-2                                                              | Syt2     | 0.9636 | 0.0219 |
| 552 | Q9CS84 | Neurexin-1                                                                   | Nrxn1    | 0.9630 | 0.0220 |
| 553 | Q8BQZ4 | Ral GTPase-activating protein subunit beta                                   | Ralgapb  | 0.9622 | 0.0221 |
| 554 | P10637 | Microtubule-associated protein tau                                           | Mapt     | 0.9595 | 0.0223 |
| 555 | Q9CW03 | Structural maintenance of chromosomes protein 3                              | Smc3     | 0.9588 | 0.0223 |
| 556 | Q8K448 | Cholesterol transporter ABCA5                                                | Abca5    | 0.9587 | 0.0223 |
| 557 | Q7TT37 | Elongator complex protein 1                                                  | Elp1     | 0.9567 | 0.0224 |
| 558 | P49443 | Protein phosphatase 1A                                                       | Ppm1a    | 0.9566 | 0.0224 |
| 559 | P21550 | Beta-enolase                                                                 | Eno3     | 0.9553 | 0.0225 |
| 560 | Q8BUV3 | Gephyrin                                                                     | Gphn     | 0.9527 | 0.0227 |
| 561 | P55194 | SH3 domain-binding protein 1                                                 | Sh3bp1   | 0.9487 | 0.0235 |
| 562 | Q8R550 | SH3 domain-containing kinase-binding protein 1                               | Sh3kbp1  | 0.9476 | 0.0236 |
| 563 | Q99KN9 | Clathrin interactor 1                                                        | Clint1   | 0.9454 | 0.0237 |
| 564 | P39688 | Tyrosine-protein kinase Fyn                                                  | Fyn      | 0.9443 | 0.0237 |
| 565 | Q3V132 | ADP/ATP translocase 4                                                        | Slc25a31 | 0.9433 | 0.0238 |
| 566 | Q8C561 | G-protein coupled receptor-associated protein LMBRD2                         | Lmbrd2   | 0.9431 | 0.0238 |
| 567 | B2RQL2 | Storkhead-box protein 1                                                      | Stox1    | 0.9431 | 0.0238 |
| 568 | Q570Y9 | DEP domain-containing mTOR-interacting protein                               | Deptor   | 0.9423 | 0.0238 |
| 569 | Q88712 | C-terminal-binding protein 1                                                 | Ctbp1    | 0.9419 | 0.0238 |
| 570 | Q8VEK3 | Heterogeneous nuclear ribonucleoprotein U                                    | Hnrnpu   | 0.9399 | 0.0239 |
| 571 | Q3UHE1 | Membrane-associated phosphatidylinositol transfer protein 3                  | Pitpnm3  | 0.9394 | 0.0240 |
| 572 | Q8VCN9 | Tubulin-specific chaperone C                                                 | Tbcc     | 0.9394 | 0.0240 |
| 573 | Q64096 | Guanine nucleotide exchange factor DBS                                       | Mcf2l    | 0.9365 | 0.0243 |
| 574 | Q9D1D4 | Transmembrane emp24 domain-containing protein 10                             | Tmed10   | 0.9360 | 0.0244 |

|     |        |                                                                           |          |        |        |
|-----|--------|---------------------------------------------------------------------------|----------|--------|--------|
| 575 | Q5DTT2 | PH and SEC7 domain-containing protein 1                                   | Psd      | 0.9345 | 0.0245 |
| 576 | E9Q5F9 | Histone-lysine N-methyltransferase SETD2                                  | Setd2    | 0.9327 | 0.0245 |
| 577 | Q8R3Q2 | Serine/threonine-protein phosphatase 6 regulatory subunit 2               | Ppp6r2   | 0.9316 | 0.0246 |
| 578 | P46096 | Synaptotagmin-1                                                           | Syt1     | 0.9313 | 0.0247 |
| 579 | Q91WD5 | NADH dehydrogenase [ubiquinone] iron-sulfur protein 2 mitochondrial       | Ndufs2   | 0.9311 | 0.0247 |
| 580 | Q6RT24 | Centromere-associated protein E                                           | Cenpe    | 0.9304 | 0.0247 |
| 581 | Q61481 | Calcium/calmodulin-dependent 3' 5'-cyclic nucleotide phosphodiesterase 1A | Pde1a    | 0.9282 | 0.0249 |
| 582 | P26039 | Talin-1                                                                   | Tln1     | 0.9280 | 0.0250 |
| 583 | Q810B6 | Rabankyrin-5                                                              | Ankfy1   | 0.9271 | 0.0250 |
| 584 | Q9QYI5 | DnaJ homolog subfamily B member 2                                         | Dnajb2   | 0.9267 | 0.0251 |
| 585 | Q99LR1 | Lysophosphatidylserine lipase ABHD12                                      | Abhd12   | 0.9267 | 0.0251 |
| 586 | P05480 | Neuronal proto-oncogene tyrosine-protein kinase Src                       | Src      | 0.9254 | 0.0252 |
| 587 | Q64514 | Tripeptidyl-peptidase 2                                                   | Tpp2     | 0.9242 | 0.0253 |
| 588 | Q64133 | Amine oxidase [flavin-containing] A                                       | Maoa     | 0.9240 | 0.0253 |
| 589 | Q9CZP5 | Mitochondrial chaperone BCS1                                              | Bcs1l    | 0.9230 | 0.0253 |
| 590 | Q80TN4 | DnaJ homolog subfamily C member 16                                        | Dnajc16  | 0.9227 | 0.0253 |
| 591 | Q8BY87 | Ubiquitin carboxyl-terminal hydrolase 47                                  | Usp47    | 0.9220 | 0.0254 |
| 592 | Q8C167 | Prolyl endopeptidase-like                                                 | Prepl    | 0.9219 | 0.0254 |
| 593 | Q9R0N0 | Galactokinase                                                             | Galk1    | 0.9219 | 0.0254 |
| 594 | P16675 | Lysosomal protective protein                                              | Ctsa     | 0.9203 | 0.0256 |
| 595 | P20612 | Guanine nucleotide-binding protein G(t) subunit alpha-1                   | Gnat1    | 0.9184 | 0.0257 |
| 596 | Q6A0A9 | Constitutive coactivator of PPAR-gamma-like protein 1                     | FAM120A  | 0.9183 | 0.0257 |
| 597 | P51174 | Long-chain specific acyl-CoA dehydrogenase mitochondrial                  | Acadl    | 0.9178 | 0.0257 |
| 598 | Q6NZL0 | Protein SOGA3                                                             | Soga3    | 0.9158 | 0.0259 |
| 599 | Q6P9R2 | Serine/threonine-protein kinase R1                                        | Oxsr1    | 0.9153 | 0.0259 |
| 600 | Q8R555 | Cartilage acidic protein 1                                                | Crtac1   | 0.9150 | 0.0259 |
| 601 | Q99NH0 | Ankyrin repeat domain-containing protein 17                               | Ankrd17  | 0.9115 | 0.0261 |
| 602 | Q8BIG7 | Catechol O-methyltransferase domain-containing protein 1                  | Comtd1   | 0.9115 | 0.0261 |
| 603 | Q9D662 | Protein transport protein Sec23B                                          | Sec23b   | 0.9115 | 0.0261 |
| 604 | Q99MR8 | Methylcrotonoyl-CoA carboxylase subunit alpha mitochondrial               | Mccc1    | 0.9112 | 0.0261 |
| 605 | Q80TY0 | Formin-binding protein 1                                                  | Fnbp1    | 0.9093 | 0.0262 |
| 606 | Q8BGT7 | Survival of motor neuron-related-splicing factor 30                       | Smndc1   | 0.9089 | 0.0262 |
| 607 | Q9Z0U1 | Tight junction protein ZO-2                                               | Tjp2     | 0.9085 | 0.0263 |
| 608 | Q8BIF2 | RNA binding protein fox-1 homolog 3                                       | Rbfox3   | 0.9082 | 0.0263 |
| 609 | P06837 | Neuromodulin                                                              | Gap43    | 0.9059 | 0.0264 |
| 610 | Q80X80 | Phospholipid transfer protein C2CD2L                                      | C2cd2l   | 0.9045 | 0.0266 |
| 611 | Q80TL7 | Protein MON2 homolog                                                      | Mon2     | 0.9014 | 0.0267 |
| 612 | Q8BGF9 | Solute carrier family 25 member 44                                        | Slc25a44 | 0.9012 | 0.0268 |
| 613 | Q9CXJ4 | Mitochondrial potassium channel ATP-binding subunit                       | Abcb8    | 0.8970 | 0.0272 |
| 614 | Q91VM5 | RNA binding motif protein X-linked-like-1                                 | Rbmxl1   | 0.8964 | 0.0272 |
| 615 | P60469 | Liprin-alpha-3                                                            | Ppfia3   | 0.8959 | 0.0272 |
| 616 | Q6P5E8 | Diacylglycerol kinase theta                                               | Dgkq     | 0.8931 | 0.0274 |
| 617 | Q60676 | Serine/threonine-protein phosphatase 5                                    | Ppp5c    | 0.8918 | 0.0275 |
| 618 | Q80XI3 | Eukaryotic translation initiation factor 4 gamma 3                        | Eif4g3   | 0.8906 | 0.0275 |
| 619 | Q9ESZ8 | General transcription factor II-I                                         | Gtf2i    | 0.8883 | 0.0277 |
| 620 | Q80U28 | MAP kinase-activating death domain protein                                | Madd     | 0.8878 | 0.0278 |
| 621 | Q6PDC0 | RUN domain-containing protein 3B                                          | Rundc3b  | 0.8876 | 0.0279 |
| 622 | Q6DFV3 | Rho GTPase-activating protein 21                                          | Arhgap21 | 0.8872 | 0.0282 |
| 623 | Q61644 | Protein kinase C and casein kinase substrate in neurons protein 1         | Paccin1  | 0.8863 | 0.0284 |
| 624 | O55137 | Acyl-coenzyme A thioesterase 1                                            | Acot1    | 0.8854 | 0.0284 |
| 625 | Q69ZR2 | E3 ubiquitin-protein ligase HECTD1                                        | Hectd1   | 0.8849 | 0.0284 |
| 626 | Q8BYI9 | Tenascin-R                                                                | Tnr      | 0.8831 | 0.0285 |
| 627 | P61089 | Ubiquitin-conjugating enzyme E2 N                                         | Ube2n    | 0.8825 | 0.0286 |
| 628 | Q8BG05 | Heterogeneous nuclear ribonucleoprotein A3                                | Hnrnpa3  | 0.8811 | 0.0286 |
| 629 | Q9JM96 | Cdc42 effector protein 4                                                  | Cdc42ep4 | 0.8796 | 0.0287 |
| 630 | Q4U2R1 | E3 ubiquitin-protein ligase HERC2                                         | Herc2    | 0.8796 | 0.0287 |
| 631 | Q99LC2 | Cleavage stimulation factor subunit 1                                     | Cstf1    | 0.8791 | 0.0287 |
| 632 | Q8R105 | Vacuolar protein sorting-associated protein 37C                           | Vps37c   | 0.8791 | 0.0287 |
| 633 | Q923M0 | Protein phosphatase 1 regulatory subunit 16A                              | Ppp1r16a | 0.8791 | 0.0287 |
| 634 | Q7TMW6 | Cytosolic iron-sulfur assembly component 3                                | Ciao3    | 0.8791 | 0.0287 |
| 635 | Q8CAM5 | Ras-related protein Rab-36                                                | Rab36    | 0.8791 | 0.0287 |
| 636 | Q9CWN7 | CCR4-NOT transcription complex subunit 11                                 | Cnot11   | 0.8791 | 0.0287 |
| 637 | P70213 | Friend virus susceptibility protein 1                                     | Fv1      | 0.8791 | 0.0287 |
| 638 | Q8R1U1 | Conserved oligomeric Golgi complex subunit 4                              | Cog4     | 0.8791 | 0.0287 |



|     |        |                                                                                               |          |        |        |
|-----|--------|-----------------------------------------------------------------------------------------------|----------|--------|--------|
| 639 | Q8BG89 | Protein ZNF365                                                                                | Znf365   | 0.8791 | 0.0287 |
| 640 | Q9Z2X8 | Kelch-like ECH-associated protein 1                                                           | Keap1    | 0.8791 | 0.0287 |
| 641 | Q91YE3 | Egl nine homolog 1                                                                            | Egln1    | 0.8791 | 0.0287 |
| 642 | Q8BPG6 | Inactive C-alpha-formylglycine-generating enzyme 2                                            | Sumf2    | 0.8791 | 0.0287 |
| 643 | P39038 | Cadherin-4                                                                                    | Cdh4     | 0.8791 | 0.0287 |
| 644 | B2RXR6 | Serine/threonine-protein phosphatase 6 regulatory ankyrin repeat subunit B                    | Ankrd44  | 0.8791 | 0.0287 |
| 645 | Q9DBX3 | Sushi domain-containing protein 2                                                             | Susd2    | 0.8791 | 0.0287 |
| 646 | Q9D6T0 | Nitric oxide synthase-interacting protein                                                     | Nosip    | 0.8791 | 0.0287 |
| 647 | Q3UHU5 | Microtubule cross-linking factor 1                                                            | Mtcl1    | 0.8791 | 0.0287 |
| 648 | Q7TN22 | Thioredoxin domain-containing protein 16                                                      | Txndc16  | 0.8791 | 0.0287 |
| 649 | Q7TQF2 | F-box only protein 10                                                                         | Fbxo10   | 0.8791 | 0.0287 |
| 650 | Q9D4F8 | Gamma-tubulin complex component 4                                                             | Tubgcp4  | 0.8791 | 0.0287 |
| 651 | Q6NZA9 | Transcription initiation factor TFIID subunit 9B                                              | Taf9b    | 0.8791 | 0.0287 |
| 652 | Q8VI33 | Transcription initiation factor TFIID subunit 9                                               | Taf9     | 0.8791 | 0.0287 |
| 653 | Q8BHR8 | UPF0705 protein C11orf49 homolog                                                              |          | 0.8791 | 0.0287 |
| 654 | Q6P4T1 | Sorting nexin-19                                                                              | Snx19    | 0.8791 | 0.0287 |
| 655 | O09172 | Glutamate--cysteine ligase regulatory subunit                                                 | Gclm     | 0.8791 | 0.0287 |
| 656 | Q6PGM7 | O-phosphoserine--tRNA(Sec) selenio transferase                                                | Sepsecs  | 0.8791 | 0.0287 |
| 657 | Q9Z0H3 | SWI/SNF-related matrix-associated actin-dependent regulator of chromatin subfamily B member 1 | Smarcb1  | 0.8791 | 0.0287 |
| 658 | P59113 | Fermitin family homolog 1                                                                     | Fermt1   | 0.8791 | 0.0287 |
| 659 | Q8CCG1 | Zinc finger C2HC domain-containing protein 1C                                                 | Zc2hc1c  | 0.8791 | 0.0287 |
| 660 | Q6NS46 | Protein RRP5 homolog                                                                          | Pdcd11   | 0.8791 | 0.0287 |
| 661 | Q5S006 | Leucine-rich repeat serine/threonine-protein kinase 2                                         | Lrrk2    | 0.8791 | 0.0287 |
| 662 | P35569 | Insulin receptor substrate 1                                                                  | Irs1     | 0.8791 | 0.0287 |
| 663 | Q8BM55 | Transmembrane protein 214                                                                     | Tmem214  | 0.8791 | 0.0287 |
| 664 | Q8K2A7 | Integrator complex subunit 10                                                                 | Ints10   | 0.8791 | 0.0287 |
| 665 | Q99JF8 | PC4 and SFRS1-interacting protein                                                             | Psip1    | 0.8788 | 0.0287 |
| 666 | O88685 | 26S proteasome regulatory subunit 6A                                                          | Psmc3    | 0.8781 | 0.0287 |
| 667 | Q8JZP2 | Synapsin-3                                                                                    | Syn3     | 0.8768 | 0.0288 |
| 668 | Q7TMK9 | Heterogeneous nuclear ribonucleoprotein Q                                                     | Syncrip  | 0.8763 | 0.0288 |
| 669 | Q8VEH5 | EPM2A-interacting protein 1                                                                   | Epm2aip1 | 0.8737 | 0.0290 |
| 670 | Q61598 | Rab GDP dissociation inhibitor beta                                                           | Gdi2     | 0.8735 | 0.0290 |
| 671 | O55229 | Choline/ethanolamine kinase                                                                   | Chkb     | 0.8728 | 0.0290 |
| 672 | Q8R313 | Exocyst complex component 6                                                                   | Exoc6    | 0.8715 | 0.0293 |
| 673 | P55302 | Alpha-2-macroglobulin receptor-associated protein                                             | Lrpap1   | 0.8714 | 0.0293 |
| 674 | Q9JKN6 | RNA-binding protein Nova-1                                                                    | Nova1    | 0.8711 | 0.0296 |
| 675 | Q921S7 | 39S ribosomal protein L37 mitochondrial                                                       | Mrpl37   | 0.8710 | 0.0296 |
| 676 | Q64455 | Receptor-type tyrosine-protein phosphatase eta                                                | Ptprj    | 0.8709 | 0.0296 |
| 677 | P56695 | Wolframin                                                                                     | Wfs1     | 0.8708 | 0.0296 |
| 678 | Q9JIS5 | Synaptic vesicle glycoprotein 2A                                                              | Sv2a     | 0.8689 | 0.0297 |
| 679 | Q9CZ44 | NSFL1 cofactor p47                                                                            | Nsfl1c   | 0.8676 | 0.0299 |
| 680 | Q62189 | U1 small nuclear ribonucleoprotein A                                                          | Snrpa    | 0.8661 | 0.0300 |
| 681 | Q9DCP2 | Sodium-coupled neutral amino acid transporter 3                                               | Slc38a3  | 0.8648 | 0.0300 |

Supplementary Table 2.

| Number | Accession | Protein Name                                                           | Gene Name | PLGEM-STN | p Value |
|--------|-----------|------------------------------------------------------------------------|-----------|-----------|---------|
| 1      | Q9CWF2    | Tubulin beta-2B chain                                                  | Tubb2b    | -8.9382   | 0.0000  |
| 2      | Q7TMM9    | Tubulin beta-2A chain                                                  | Tubb2a    | -8.5405   | 0.0000  |
| 3      | P68372    | Tubulin beta-4B chain                                                  | Tubb4b    | -7.7526   | 0.0000  |
| 4      | P99024    | Tubulin beta-5 chain                                                   | Tubb5     | -6.7467   | 0.0000  |
| 5      | P60202    | Myelin proteolipid protein                                             | Plp1      | -6.6446   | 0.0000  |
| 6      | Q9D6F9    | Tubulin beta-4A chain                                                  | Tubb4a    | -6.3012   | 0.0000  |
| 7      | Q9CPQ1    | Cytochrome c oxidase subunit 6C                                        | Cox6c     | -5.9010   | 0.0000  |
| 8      | Q62418    | Drebrin-like protein                                                   | Dbnl      | -5.8414   | 0.0000  |
| 9      | P01942    | Hemoglobin subunit alpha                                               | Hba       | -5.7539   | 0.0000  |
| 10     | P60710    | Actin cytoplasmic 1                                                    | Actb      | -5.7398   | 0.0000  |
| 11     | P63260    | Actin cytoplasmic 2                                                    | Actg1     | -5.5769   | 0.0000  |
| 12     | P68033    | Actin alpha cardiac muscle 1                                           | Actc1     | -5.3626   | 0.0000  |
| 13     | Q9JHU4    | Cytoplasmic dynein 1 heavy chain 1                                     | Dync1h1   | -5.1984   | 0.0000  |
| 14     | Q9Z140    | Copine-6                                                               | Cpne6     | -5.0066   | 0.0000  |
| 15     | Q9JJV2    | Profilin-2                                                             | Pfn2      | -4.9151   | 0.0000  |
| 16     | P05784    | Keratin type I cytoskeletal 18                                         | Krt18     | -4.3676   | 0.0000  |
| 17     | P02535    | Keratin type I cytoskeletal 10                                         | Krt10     | -4.3272   | 0.0000  |
| 18     | P15533    | Tripartite motif-containing protein 30A                                | Trim30a   | -4.3204   | 0.0000  |
| 19     | P04370    | Myelin basic protein                                                   | Mbp       | -4.3184   | 0.0000  |
| 20     | P68254    | 14-3-3 protein theta                                                   | Ywhaq     | -4.2408   | 0.0000  |
| 21     | Q9QWL7    | Keratin type I cytoskeletal 17                                         | Krt17     | -4.2240   | 0.0000  |
| 22     | Q92111    | Serotransferrin                                                        | Tf        | -4.1825   | 0.0000  |
| 23     | P11499    | Heat shock protein HSP 90-beta                                         | Hsp90ab1  | -4.1810   | 0.0000  |
| 24     | P62806    | Histone H4                                                             | H4c1      | -4.1660   | 0.0000  |
| 25     | Q61414    | Keratin type I cytoskeletal 15                                         | Krt15     | -4.0963   | 0.0000  |
| 26     | Q06185    | ATP synthase subunit e mitochondrial                                   | Atp5me    | -3.9996   | 0.0000  |
| 27     | P12246    | Serum amyloid P-component                                              | Apcs      | -3.9651   | 0.0000  |
| 28     | P59764    | Dedicator of cytokinesis protein 4                                     | Dock4     | -3.8862   | 0.0000  |
| 29     | P04104    | Keratin type II cytoskeletal 1                                         | Krt1      | -3.8859   | 0.0000  |
| 30     | E9PV24    | Fibrinogen alpha chain                                                 | Fga       | -3.8459   | 0.0000  |
| 31     | Q9CQZ6    | NADH dehydrogenase [ubiquinone] 1 beta subcomplex subunit 3            | Ndufb3    | -3.8278   | 0.0000  |
| 32     | P19536    | Cytochrome c oxidase subunit 5B mitochondrial                          | Cox5b     | -3.7770   | 0.0000  |
| 33     | P01027    | Complement C3                                                          | C3        | -3.7380   | 0.0000  |
| 34     | P08730    | Keratin type I cytoskeletal 13                                         | Krt13     | -3.6619   | 0.0000  |
| 35     | Q61781    | Keratin type I cytoskeletal 14                                         | Krt14     | -3.6578   | 0.0000  |
| 36     | Q9Z2K1    | Keratin type I cytoskeletal 16                                         | Krt16     | -3.6366   | 0.0000  |
| 37     | Q61016    | Guanine nucleotide-binding protein G(I)/G(S)/G(O) subunit gamma-7      | Gng7      | -3.6163   | 0.0000  |
| 38     | P48453    | Serine/threonine-protein phosphatase 2B catalytic subunit beta isoform | Ppp3cb    | -3.6034   | 0.0000  |
| 39     | P63101    | 14-3-3 protein zeta/delta                                              | Ywhaz     | -3.5900   | 0.0000  |
| 40     | P62897    | Cytochrome c somatic                                                   | Cycc      | -3.5703   | 0.0000  |
| 41     | P03995    | Glial fibrillary acidic protein                                        | Gfap      | -3.5126   | 0.0000  |
| 42     | Q9DB05    | Alpha-soluble NSF attachment protein                                   | Napa      | -3.5106   | 0.0000  |
| 43     | O55143    | Sarcoplasmic/endoplasmic reticulum calcium ATPase 2                    | Atp2a2    | -3.4541   | 0.0000  |
| 44     | Q8CIQ7    | Dedicator of cytokinesis protein 3                                     | Dock3     | -3.4138   | 0.0000  |
| 45     | Q922U2    | Keratin type II cytoskeletal 5                                         | Krt5      | -3.3870   | 0.0000  |
| 46     | P19783    | Cytochrome c oxidase subunit 4 isoform 1 mitochondrial                 | Cox4i1    | -3.3805   | 0.0000  |
| 47     | P11798    | Calcium/calmodulin-dependent protein kinase type II subunit alpha      | Camk2a    | -3.3767   | 0.0000  |
| 48     | Q9CQV8    | 14-3-3 protein beta/alpha                                              | Ywhab     | -3.3447   | 0.0000  |
| 49     | Q6PIC6    | Sodium/potassium-transporting ATPase subunit alpha-3                   | Atp1a3    | -3.3330   | 0.0000  |
| 50     | Q7TSC1    | Protein PRRC2A                                                         | Prrc2a    | -3.3318   | 0.0000  |
| 51     | P56399    | Ubiquitin carboxyl-terminal hydrolase 5                                | Usp5      | -3.3161   | 0.0000  |
| 52     | P01869    | Ig gamma-1 chain C region membrane-bound form                          | Ighg1     | -3.3143   | 0.0000  |
| 53     | Q6IFZ6    | Keratin type II cytoskeletal 1b                                        | Krt77     | -3.2823   | 0.0000  |
| 54     | Q9D0M5    | Dynein light chain 2 cytoplasmic                                       | Dynll2    | -3.2543   | 0.0000  |
| 55     | P62259    | 14-3-3 protein epsilon                                                 | Ywhae     | -3.2259   | 0.0000  |
| 56     | Q3TTY5    | Keratin type II cytoskeletal 2 epidermal                               | Krt2      | -3.2243   | 0.0000  |
| 57     | Q91WS0    | CDGSH iron-sulfur domain-containing protein 1                          | Cisd1     | -3.1892   | 0.0000  |
| 58     | P01868    | Ig gamma-1 chain C region secreted form                                | Ighg1     | -3.1743   | 0.0000  |
| 59     | Q922F4    | Tubulin beta-6 chain                                                   | Tubb6     | -3.1732   | 0.0000  |
| 60     | Q9WV96    | Mitochondrial import inner membrane translocase subunit Tim10 B        | Timm10b   | -3.1675   | 0.0000  |
| 61     | Q9CQ69    | Cytochrome b-c1 complex subunit 8                                      | Uqcrcq    | -3.1444   | 0.0000  |
| 62     | P02088    | Hemoglobin subunit beta-1                                              | Hbb-b1    | -3.1278   | 0.0001  |
| 63     | Q78IK2    | ATP synthase membrane subunit K mitochondrial                          | Atp5mk    | -3.1134   | 0.0001  |
| 64     | P62823    | Ras-related protein Rab-3C                                             | Rab3c     | -3.1129   | 0.0001  |
| 65     | Q4FZF3    | Probable ATP-dependent RNA helicase DDX49                              | Ddx49     | -3.1124   | 0.0001  |

|     |        |                                                                         |          |         |        |
|-----|--------|-------------------------------------------------------------------------|----------|---------|--------|
| 66  | P62962 | Profilin-1                                                              | Pfn1     | -3.1006 | 0.0001 |
| 67  | Q6NZC7 | SEC23-interacting protein                                               | Sec23ip  | -3.0933 | 0.0001 |
| 68  | P19001 | Keratin type I cytoskeletal 19                                          | Krt19    | -3.0855 | 0.0001 |
| 69  | P10649 | Glutathione S-transferase Mu 1                                          | Gstm1    | -3.0638 | 0.0001 |
| 70  | O55142 | 60S ribosomal protein L35a                                              | Rpl35a   | -3.0492 | 0.0001 |
| 71  | P59108 | Copine-2                                                                | Cpne2    | -3.0289 | 0.0001 |
| 72  | Q91YE6 | Importin-9                                                              | Ipo9     | -3.0154 | 0.0001 |
| 73  | Q812A2 | SLIT-ROBO Rho GTPase-activating protein 3                               | Srgap3   | -3.0053 | 0.0001 |
| 74  | P02089 | Hemoglobin subunit beta-2                                               | Hbb-b2   | -3.0037 | 0.0001 |
| 75  | Q8BFZ3 | Beta-actin-like protein 2                                               | Actbl2   | -3.0022 | 0.0001 |
| 76  | P11404 | Fatty acid-binding protein heart                                        | Fabp3    | -2.9912 | 0.0001 |
| 77  | Q3UX10 | Tubulin alpha chain-like 3                                              | Tubal3   | -2.9804 | 0.0001 |
| 78  | F6SEU4 | Ras/Rap GTPase-activating protein SynGAP                                | Syngap1  | -2.9573 | 0.0001 |
| 79  | Q9QUM9 | Proteasome subunit alpha type-6                                         | Psma6    | -2.9517 | 0.0001 |
| 80  | Q9QXZ0 | Microtubule-actin cross-linking factor 1                                | Macf1    | -2.9399 | 0.0001 |
| 81  | P07901 | Heat shock protein HSP 90-alpha                                         | Hsp90aa1 | -2.9264 | 0.0001 |
| 82  | Q9QVP9 | Protein-tyrosine kinase 2-beta                                          | Ptk2b    | -2.9241 | 0.0001 |
| 83  | Q9CQR4 | Acyl-coenzyme A thioesterase 13                                         | Acot13   | -2.9032 | 0.0001 |
| 84  | P52503 | NADH dehydrogenase [ubiquinone] iron-sulfur protein 6 mitochondrial     | Ndufs6   | -2.8954 | 0.0001 |
| 85  | Q9JLF6 | Protein-glutamine gamma-glutamyltransferase K                           | Tgm1     | -2.8909 | 0.0001 |
| 86  | Q80ZJ1 | Ras-related protein Rap-2a                                              | Rap2a    | -2.8685 | 0.0001 |
| 87  | Q9ROH5 | Keratin type II cytoskeletal 71                                         | Krt71    | -2.8624 | 0.0001 |
| 88  | P35846 | Folate receptor alpha                                                   | Folr1    | -2.8569 | 0.0001 |
| 89  | P63328 | Serine/threonine-protein phosphatase 2B catalytic subunit alpha isoform | Ppp3ca   | -2.8295 | 0.0001 |
| 90  | P63216 | Guanine nucleotide-binding protein G(I)/G(S)/G(O) subunit gamma-3       | Gng3     | -2.8255 | 0.0001 |
| 91  | Q91V41 | Ras-related protein Rab-14                                              | Rab14    | -2.8168 | 0.0001 |
| 92  | Q8BPN8 | DmX-like protein 2                                                      | Dmxl2    | -2.8124 | 0.0001 |
| 93  | P62737 | Actin aortic smooth muscle                                              | Acta2    | -2.8117 | 0.0001 |
| 94  | P16546 | Spectrin alpha chain non-erythrocytic 1                                 | Sptan1   | -2.7844 | 0.0001 |
| 95  | Q9CPQ8 | ATP synthase subunit g mitochondrial                                    | Atp5mg   | -2.7807 | 0.0001 |
| 96  | P13595 | Neural cell adhesion molecule 1                                         | Ncam1    | -2.7493 | 0.0001 |
| 97  | P20152 | Vimentin                                                                | Vim      | -2.7416 | 0.0001 |
| 98  | P14873 | Microtubule-associated protein 1B                                       | Map1b    | -2.7318 | 0.0001 |
| 99  | Q91V16 | Electron transfer flavoprotein regulatory factor 1                      | Etf1     | -2.7222 | 0.0001 |
| 100 | Q99PT1 | Rho GDP-dissociation inhibitor 1                                        | Arhgdia  | -2.7190 | 0.0001 |
| 101 | P63158 | High mobility group protein B1                                          | Hmgb1    | -2.7125 | 0.0001 |
| 102 | P21460 | Cystatin-C                                                              | Cst3     | -2.7097 | 0.0001 |
| 103 | P52760 | 2-iminobutanoate/2-iminopropanoate deaminase                            | Rida     | -2.7058 | 0.0001 |
| 104 | P07309 | Transthyretin                                                           | Ttr      | -2.7037 | 0.0001 |
| 105 | O35382 | Exocyst complex component 4                                             | Exoc4    | -2.6968 | 0.0001 |
| 106 | Q5SYD0 | Unconventional myosin-1d                                                | Myo1d    | -2.6930 | 0.0001 |
| 107 | Q9D855 | Cytochrome b-c1 complex subunit 7                                       | Uqcrb    | -2.6868 | 0.0001 |
| 108 | P63024 | Vesicle-associated membrane protein 3                                   | Vamp3    | -2.6682 | 0.0001 |
| 109 | Q9Z0R4 | Intersectin-1                                                           | Itn1     | -2.6661 | 0.0001 |
| 110 | Q19LI2 | Alpha-1B-glycoprotein                                                   | A1bg     | -2.6570 | 0.0001 |
| 111 | Q9DAS9 | Guanine nucleotide-binding protein G(I)/G(S)/G(O) subunit gamma-12      | Gng12    | -2.6507 | 0.0001 |
| 112 | P39061 | Collagen alpha-1(XVIII) chain                                           | Col18a1  | -2.6420 | 0.0001 |
| 113 | Q6NXH9 | Keratin type II cytoskeletal 73                                         | Krt73    | -2.6167 | 0.0001 |
| 114 | P0C8K7 | Small integral membrane protein 1                                       | Smim1    | -2.6149 | 0.0001 |
| 115 | P70261 | Paladin                                                                 | Pald1    | -2.6039 | 0.0001 |
| 116 | Q61699 | Heat shock protein 105 kDa                                              | Hsph1    | -2.6001 | 0.0001 |
| 117 | P63323 | 40S ribosomal protein S12                                               | Rps12    | -2.5986 | 0.0001 |
| 118 | P05532 | Mast/stem cell growth factor receptor Kit                               | Kit      | -2.5970 | 0.0001 |
| 119 | P23492 | Purine nucleoside phosphorylase                                         | Pnp      | -2.5897 | 0.0001 |
| 120 | Q9JHS3 | Ragulator complex protein LAMTOR2                                       | Lamtor2  | -2.5806 | 0.0001 |
| 121 | Q8BHB9 | Chloride intracellular channel protein 6                                | Clic6    | -2.5704 | 0.0002 |
| 122 | Q80YA9 | Connector enhancer of kinase suppressor of ras 2                        | Cnksr2   | -2.5650 | 0.0002 |
| 123 | P0DP60 | Ly-6/neurotoxin-like protein 1                                          | Lynx1    | -2.5538 | 0.0002 |
| 124 | Q11011 | Puromycin-sensitive aminopeptidase                                      | Npepps   | -2.5495 | 0.0002 |
| 125 | Q9DCC8 | Mitochondrial import receptor subunit TOM20 homolog                     | Tomm20   | -2.5444 | 0.0002 |
| 126 | Q6IFX2 | Keratin type I cytoskeletal 42                                          | Krt42    | -2.5272 | 0.0002 |
| 127 | P62307 | Small nuclear ribonucleoprotein F                                       | Snrpf    | -2.4954 | 0.0002 |
| 128 | P63011 | Ras-related protein Rab-3A                                              | Rab3a    | -2.4838 | 0.0002 |
| 129 | Q9JJU8 | SH3 domain-binding glutamic acid-rich-like protein                      | Sh3bgrl  | -2.4782 | 0.0002 |
| 130 | P63030 | Mitochondrial pyruvate carrier 1                                        | Mpc1     | -2.4757 | 0.0002 |
| 131 | Q8K3J1 | NADH dehydrogenase [ubiquinone] iron-sulfur protein 8 mitochondrial     | Ndufs8   | -2.4706 | 0.0002 |
| 132 | P63044 | Vesicle-associated membrane protein 2                                   | Vamp2    | -2.4703 | 0.0002 |

|     |        |                                                                  |          |         |        |
|-----|--------|------------------------------------------------------------------|----------|---------|--------|
| 133 | Q9WV55 | Vesicle-associated membrane protein-associated protein A         | Vapa     | -2.4631 | 0.0002 |
| 134 | P56391 | Cytochrome c oxidase subunit 6B1                                 | Cox6b1   | -2.4435 | 0.0002 |
| 135 | P56379 | ATP synthase subunit ATP5MJ mitochondrial                        | Atp5mj   | -2.4350 | 0.0002 |
| 136 | Q80ZW2 | Protein THEM6                                                    | Them6    | -2.4349 | 0.0002 |
| 137 | O08709 | Peroxisome oxidoreductin-6                                       | Prdx6    | -2.4050 | 0.0002 |
| 138 | P47757 | F-actin-capping protein subunit beta                             | Capzb    | -2.3956 | 0.0002 |
| 139 | Q4KUS2 | Protein unc-13 homolog A                                         | Unc13a   | -2.3955 | 0.0002 |
| 140 | Q8R164 | Valacyclovir hydrolase                                           | Bphl     | -2.3908 | 0.0002 |
| 141 | P62702 | 40S ribosomal protein S4 X isoform                               | Rps4x    | -2.3902 | 0.0002 |
| 142 | P20444 | Protein kinase C alpha type                                      | Prkca    | -2.3693 | 0.0002 |
| 143 | P61982 | 14-3-3 protein gamma                                             | Ywhag    | -2.3623 | 0.0002 |
| 144 | Q0VE82 | Copine-7                                                         | Cpne7    | -2.3585 | 0.0002 |
| 145 | Q6PB66 | Leucine-rich PPR motif-containing protein mitochondrial          | Lrpprc   | -2.3562 | 0.0002 |
| 146 | Q61495 | Desmoglein-1-alpha                                               | Dsg1a    | -2.3433 | 0.0003 |
| 147 | Q7TSF1 | Desmoglein-1-beta                                                | Dsg1b    | -2.3433 | 0.0003 |
| 148 | Q5SXY1 | Cytospin-B                                                       | Specc1   | -2.3365 | 0.0003 |
| 149 | Q8CHC4 | Synaptojanin-1                                                   | Synj1    | -2.3189 | 0.0003 |
| 150 | Q9D2R6 | Cytochrome c oxidase assembly factor 3 homolog mitochondrial     | Coa3     | -2.3143 | 0.0003 |
| 151 | Q9WTT4 | V-type proton ATPase subunit G 2                                 | Atp6v1g2 | -2.3122 | 0.0003 |
| 152 | P17897 | Lysozyme C-1                                                     | Lyz1     | -2.3084 | 0.0003 |
| 153 | P35276 | Ras-related protein Rab-3D                                       | Rab3d    | -2.3083 | 0.0003 |
| 154 | P68510 | 14-3-3 protein eta                                               | Ywhah    | -2.3005 | 0.0003 |
| 155 | P51880 | Fatty acid-binding protein brain                                 | Fabp7    | -2.3000 | 0.0003 |
| 156 | P19096 | Fatty acid synthase                                              | Fasn     | -2.2986 | 0.0003 |
| 157 | E9Q3L2 | Phosphatidylinositol 4-kinase alpha                              | Pi4ka    | -2.2949 | 0.0003 |
| 158 | P55066 | Neurocan core protein                                            | Ncan     | -2.2838 | 0.0003 |
| 159 | P31786 | Acyl-CoA-binding protein                                         | Dbi      | -2.2832 | 0.0003 |
| 160 | P15626 | Glutathione S-transferase Mu 2                                   | Gstm2    | -2.2763 | 0.0003 |
| 161 | O55042 | Alpha-synuclein                                                  | SncA     | -2.2724 | 0.0003 |
| 162 | Q9EQK5 | Major vault protein                                              | Mvp      | -2.2700 | 0.0003 |
| 163 | P63038 | 60 kDa heat shock protein mitochondrial                          | Hspd1    | -2.2657 | 0.0003 |
| 164 | Q61646 | Haptoglobin                                                      | Hp       | -2.2601 | 0.0003 |
| 165 | Q62261 | Spectrin beta chain non-erythrocytic 1                           | Sptbn1   | -2.2545 | 0.0003 |
| 166 | A1L317 | Keratin type I cytoskeletal 24                                   | Krt24    | -2.2443 | 0.0003 |
| 167 | P84075 | Neuron-specific calcium-binding protein hippocalcin              | Hpca     | -2.2368 | 0.0003 |
| 168 | P16054 | Protein kinase C epsilon type                                    | Prkce    | -2.2312 | 0.0003 |
| 169 | O35551 | Rab GTPase-binding effector protein 1                            | Rabep1   | -2.2242 | 0.0003 |
| 170 | Q8K0E8 | Fibrinogen beta chain                                            | Fgb      | -2.2225 | 0.0003 |
| 171 | Q3UGR5 | Haloacid dehalogenase-like hydrolase domain-containing protein 2 | Hdhd2    | -2.2194 | 0.0003 |
| 172 | Q6NWX3 | Intraflagellar transport protein 122 homolog                     | Ift122   | -2.2095 | 0.0003 |
| 173 | Q80WR1 | Tetraspanin-18                                                   | Tspan18  | -2.2095 | 0.0003 |
| 174 | Q5SQX6 | Cytoplasmic FMR1-interacting protein 2                           | Cyfi2    | -2.1929 | 0.0003 |
| 175 | Q99J47 | Dehydrogenase/reductase SDR family member 7B                     | Dhrs7b   | -2.1796 | 0.0004 |
| 176 | Q9Z2V6 | Histone deacetylase 5                                            | Hdac5    | -2.1786 | 0.0004 |
| 177 | O54983 | Ketimine reductase mu-crystallin                                 | Crym     | -2.1779 | 0.0004 |
| 178 | P48758 | Carbonyl reductase [NADPH] 1                                     | Cbr1     | -2.1748 | 0.0004 |
| 179 | Q60931 | Voltage-dependent anion-selective channel protein 3              | Vdac3    | -2.1703 | 0.0004 |
| 180 | Q60605 | Myosin light polypeptide 6                                       | Myl6     | -2.1659 | 0.0004 |
| 181 | P19157 | Glutathione S-transferase P 1                                    | Gstp1    | -2.1486 | 0.0004 |
| 182 | Q9QZ88 | Vacuolar protein sorting-associated protein 29                   | Vps29    | -2.1339 | 0.0005 |
| 183 | P57746 | V-type proton ATPase subunit D                                   | Atp6v1d  | -2.1334 | 0.0005 |
| 184 | Q9CQ65 | S-methyl-5'-thioadenosine phosphorylase                          | Mtap     | -2.1198 | 0.0005 |
| 185 | Q99LX0 | Parkinson disease protein 7 homolog                              | Park7    | -2.1140 | 0.0005 |
| 186 | Q9R0P9 | Ubiquitin carboxyl-terminal hydrolase isozyme L1                 | Uchl1    | -2.1122 | 0.0005 |
| 187 | P18242 | Cathepsin D                                                      | Ctsd     | -2.1083 | 0.0005 |
| 188 | P48774 | Glutathione S-transferase Mu 5                                   | Gstm5    | -2.1024 | 0.0005 |
| 189 | Q9Z1T2 | Thrombospondin-4                                                 | Thbs4    | -2.0897 | 0.0005 |
| 190 | Q4KMM3 | Oxidation resistance protein 1                                   | Oxr1     | -2.0875 | 0.0005 |
| 191 | Q64105 | Sepiapterin reductase                                            | Spr      | -2.0813 | 0.0005 |
| 192 | O54940 | BCL2/adenovirus E1B 19 kDa protein-interacting protein 2         | Bnip2    | -2.0789 | 0.0005 |
| 193 | Q9D379 | Epoxyde hydrolase 1                                              | Ephx1    | -2.0673 | 0.0005 |
| 194 | Q9Z2I9 | Succinate--CoA ligase [ADP-forming] subunit beta mitochondrial   | Sucla2   | -2.0672 | 0.0005 |
| 195 | Q8K1X4 | Nck-associated protein 1-like                                    | Nckap1l  | -2.0670 | 0.0005 |
| 196 | P61294 | Ras-related protein Rab-6B                                       | Rab6b    | -2.0626 | 0.0005 |
| 197 | Q9JMH9 | Unconventional myosin-XVIIIa                                     | Myo18a   | -2.0582 | 0.0005 |
| 198 | Q9EPN1 | Neurobeachin                                                     | Nbea     | -2.0559 | 0.0005 |
| 199 | Q9QXS1 | Plectin                                                          | Plec     | -2.0504 | 0.0005 |

|     |        |                                                                         |           |         |        |
|-----|--------|-------------------------------------------------------------------------|-----------|---------|--------|
| 200 | P52480 | Pyruvate kinase PKM                                                     | Pkm       | -2.0425 | 0.0005 |
| 201 | Q8VCM7 | Fibrinogen gamma chain                                                  | Fgg       | -2.0425 | 0.0005 |
| 202 | P48455 | Serine/threonine-protein phosphatase 2B catalytic subunit gamma isoform | Ppp3cc    | -2.0380 | 0.0005 |
| 203 | P83940 | Elongin-C                                                               | Eloc      | -2.0369 | 0.0005 |
| 204 | Q8BYR5 | Calcium-dependent secretion activator 2                                 | Cadps2    | -2.0364 | 0.0005 |
| 205 | P51910 | Apolipoprotein D                                                        | Apod      | -2.0362 | 0.0005 |
| 206 | P60521 | Gamma-aminobutyric acid receptor-associated protein-like 2              | Gabarapl2 | -2.0358 | 0.0005 |
| 207 | P61205 | ADP-ribosylation factor 3                                               | Arf3      | -2.0283 | 0.0005 |
| 208 | Q8CI71 | Syndetin                                                                | Vps50     | -2.0152 | 0.0006 |
| 209 | Q9WTZ1 | RING-box protein 2                                                      | Rnf7      | -2.0056 | 0.0006 |
| 210 | P61226 | Ras-related protein Rap-2b                                              | Rap2b     | -2.0041 | 0.0006 |
| 211 | Q80TJ1 | Calcium-dependent secretion activator 1                                 | Cadps     | -1.9912 | 0.0006 |
| 212 | P84078 | ADP-ribosylation factor 1                                               | Arf1      | -1.9870 | 0.0006 |
| 213 | P58252 | Elongation factor 2                                                     | Eef2      | -1.9862 | 0.0006 |
| 214 | B1AQ75 | Keratin type I cuticular Ha6                                            | Krt36     | -1.9854 | 0.0006 |
| 215 | Q61166 | Microtubule-associated protein RP/EB family member 1                    | Mapre1    | -1.9853 | 0.0006 |
| 216 | Q3UJP5 | Protein C8orf37 homolog                                                 |           | -1.9828 | 0.0006 |
| 217 | Q9CQ54 | NADH dehydrogenase [ubiquinone] 1 subunit C2                            | Ndufc2    | -1.9786 | 0.0006 |
| 218 | Q7TMB8 | Cytoplasmic FMR1-interacting protein 1                                  | Cyfp1     | -1.9771 | 0.0006 |
| 219 | Q9D859 | BOLA-like protein 1                                                     | Bola1     | -1.9764 | 0.0006 |
| 220 | Q35066 | Kinesin-like protein KIF3C                                              | Kif3c     | -1.9711 | 0.0006 |
| 221 | P21107 | Tropomyosin alpha-3 chain                                               | Tpm3      | -1.9594 | 0.0006 |
| 222 | P05213 | Tubulin alpha-1B chain                                                  | Tuba1b    | -1.9488 | 0.0006 |
| 223 | Q8BLR2 | Copine-4                                                                | Cpne4     | -1.9483 | 0.0006 |
| 224 | P19639 | Glutathione S-transferase Mu 3                                          | Gstm3     | -1.9439 | 0.0006 |
| 225 | A2ALK8 | Tyrosine-protein phosphatase non-receptor type 3                        | Ptpn3     | -1.9417 | 0.0006 |
| 226 | Q8C8R3 | Ankyrin-2                                                               | Ank2      | -1.9413 | 0.0006 |
| 227 | Q8CHU3 | Epsin-2                                                                 | Epn2      | -1.9367 | 0.0006 |
| 228 | Q01853 | Transitional endoplasmic reticulum ATPase                               | Vcp       | -1.9351 | 0.0006 |
| 229 | O70589 | Peripheral plasma membrane protein CASK                                 | Cask      | -1.9343 | 0.0006 |
| 230 | P12787 | Cytochrome c oxidase subunit 5A mitochondrial                           | Cox5a     | -1.9305 | 0.0007 |
| 231 | Q9EST1 | Gasdermin-A                                                             | Gsdma     | -1.9305 | 0.0007 |
| 232 | Q9CR00 | 26S proteasome non-ATPase regulatory subunit 9                          | Psmd9     | -1.9246 | 0.0007 |
| 233 | P56480 | ATP synthase subunit beta mitochondrial                                 | Atp5f1b   | -1.9126 | 0.0007 |
| 234 | P35803 | Neuronal membrane glycoprotein M6-b                                     | Gpm6b     | -1.9093 | 0.0007 |
| 235 | Q8COM9 | Isoaspartyl peptidase/L-asparaginase                                    | Asrgl1    | -1.9048 | 0.0007 |
| 236 | P62774 | Myotrophin                                                              | Mtpn      | -1.9033 | 0.0007 |
| 237 | Q9D2P8 | Myelin-associated oligodendrocyte basic protein                         | Mobp      | -1.9024 | 0.0007 |
| 238 | Q4FK66 | Pre-mRNA-splicing factor 38A                                            | Prpf38a   | -1.9012 | 0.0007 |
| 239 | Q62446 | Peptidyl-prolyl cis-trans isomerase FKBP3                               | Fkbp3     | -1.8907 | 0.0007 |
| 240 | P70336 | Rho-associated protein kinase 2                                         | Rock2     | -1.8826 | 0.0007 |
| 241 | P0DP27 | Calmodulin-2                                                            | Calm2     | -1.8809 | 0.0007 |
| 242 | P0DP28 | Calmodulin-3                                                            | Calm3     | -1.8809 | 0.0007 |
| 243 | P0DP26 | Calmodulin-1                                                            | Calm1     | -1.8809 | 0.0007 |
| 244 | Q9DBG3 | AP-2 complex subunit beta                                               | Ap2b1     | -1.8780 | 0.0007 |
| 245 | P97384 | Annexin A11                                                             | Anxa11    | -1.8688 | 0.0007 |
| 246 | Q69ZH9 | Rho GTPase-activating protein 23                                        | Arhgap23  | -1.8649 | 0.0008 |
| 247 | Q9Z0E0 | Neurochondrin                                                           | Ncdn      | -1.8636 | 0.0008 |
| 248 | P00015 | Cytochrome c testis-specific                                            | Cyct      | -1.8594 | 0.0008 |
| 249 | Q8CFV4 | Neuritin                                                                | Nrn1      | -1.8552 | 0.0008 |
| 250 | Q9D1K2 | V-type proton ATPase subunit F                                          | Atp6v1f   | -1.8552 | 0.0008 |
| 251 | Q8BU31 | Ras-related protein Rap-2c                                              | Rap2c     | -1.8514 | 0.0008 |
| 252 | Q9DAK9 | 14 kDa phosphohistidine phosphatase                                     | Phpt1     | -1.8491 | 0.0008 |
| 253 | Q3UH99 | Protein shisa-6                                                         | Shisa6    | -1.8471 | 0.0008 |
| 254 | P97350 | Plakophilin-1                                                           | Pkp1      | -1.8466 | 0.0008 |
| 255 | Q9D3D9 | ATP synthase subunit delta mitochondrial                                | Atp5f1d   | -1.8453 | 0.0008 |
| 256 | Q6NXX7 | Inactive dipeptidyl peptidase 10                                        | Dpp10     | -1.8447 | 0.0008 |
| 257 | P46460 | Vesicle-fusing ATPase                                                   | Nsf       | -1.8441 | 0.0008 |
| 258 | Q05816 | Fatty acid-binding protein 5                                            | Fabp5     | -1.8430 | 0.0008 |
| 259 | Q64433 | 10 kDa heat shock protein mitochondrial                                 | Hspe1     | -1.8424 | 0.0008 |
| 260 | P63321 | Ras-related protein Ral-A                                               | Rala      | -1.8417 | 0.0008 |
| 261 | Q9Z1P6 | NADH dehydrogenase [ubiquinone] 1 alpha subcomplex subunit 7            | Ndufa7    | -1.8397 | 0.0008 |
| 262 | P56564 | Excitatory amino acid transporter 1                                     | Slc1a3    | -1.8370 | 0.0008 |
| 263 | Q8BYA0 | Tubulin-specific chaperone D                                            | Tbcd      | -1.8358 | 0.0008 |
| 264 | P06909 | Complement factor H                                                     | Cfh       | -1.8346 | 0.0008 |
| 265 | Q61387 | Cytochrome c oxidase subunit 7A-related protein mitochondrial           | Cox7a2l   | -1.8346 | 0.0008 |
| 266 | Q9R1P1 | Proteasome subunit beta type-3                                          | Psmb3     | -1.8271 | 0.0008 |

|     |        |                                                            |          |         |        |
|-----|--------|------------------------------------------------------------|----------|---------|--------|
| 267 | P70349 | Histidine triad nucleotide-binding protein 1               | Hint1    | -1.8239 | 0.0008 |
| 268 | Q9QYX7 | Protein piccolo                                            | Pclo     | -1.8196 | 0.0008 |
| 269 | P70704 | Phospholipid-transporting ATPase IA                        | Atp8a1   | -1.8185 | 0.0008 |
| 270 | P26883 | Peptidyl-prolyl cis-trans isomerase FKBP1A                 | Fkbp1a   | -1.8134 | 0.0008 |
| 271 | Q0VBF8 | Protein stum homolog                                       | Stum     | -1.8110 | 0.0008 |
| 272 | Q80X90 | Filamin-B                                                  | Flnb     | -1.8101 | 0.0008 |
| 273 | Q9JLQ2 | ARF GTPase-activating protein GIT2                         | Git2     | -1.8093 | 0.0008 |
| 274 | P70275 | Semaphorin-3E                                              | Sema3e   | -1.8011 | 0.0009 |
| 275 | Q9JI75 | Ribosylidihydroxynicotinamide dehydrogenase [quinone]      | Nqo2     | -1.8003 | 0.0009 |
| 276 | Q9WU78 | Programmed cell death 6-interacting protein                | Pdcd6ip  | -1.8001 | 0.0009 |
| 277 | Q9R1S8 | Calpain-7                                                  | Capn7    | -1.7991 | 0.0009 |
| 278 | Q08189 | Protein-glutamine gamma-glutamyltransferase E              | Tgm3     | -1.7886 | 0.0009 |
| 279 | O54962 | Barrier-to-autointegration factor                          | Banf1    | -1.7886 | 0.0009 |
| 280 | P40240 | CD9 antigen                                                | Cd9      | -1.7880 | 0.0009 |
| 281 | Q8VED5 | Keratin type II cytoskeletal 79                            | Krt79    | -1.7871 | 0.0009 |
| 282 | E9Q401 | Ryanodine receptor 2                                       | Ryr2     | -1.7865 | 0.0009 |
| 283 | Q8C1B1 | Calmodulin-regulated spectrin-associated protein 2         | Camsap2  | -1.7742 | 0.0010 |
| 284 | Q5U3K5 | Rab-like protein 6                                         | Rab16    | -1.7738 | 0.0010 |
| 285 | P62855 | 40S ribosomal protein S26                                  | Rps26    | -1.7723 | 0.0010 |
| 286 | P01029 | Complement C4-B                                            | C4b      | -1.7692 | 0.0010 |
| 287 | Q9CQD1 | Ras-related protein Rab-5A                                 | Rab5a    | -1.7670 | 0.0010 |
| 288 | Q9D6G9 | CKLF-like MARVEL transmembrane domain-containing protein 5 | Cmtm5    | -1.7654 | 0.0010 |
| 289 | Q4PIX1 | Protein odr-4 homolog                                      | Odr4     | -1.7636 | 0.0010 |
| 290 | Q8VE19 | GATOR complex protein MI                                   | Mios     | -1.7600 | 0.0010 |
| 291 | Q922D8 | C-1-tetrahydrofolate synthase cytoplasmic                  | Mthfd1   | -1.7502 | 0.0010 |
| 292 | Q62425 | Cytochrome c oxidase subunit NDUFA4                        | Ndufa4   | -1.7484 | 0.0010 |
| 293 | Q05920 | Pyruvate carboxylase mitochondrial                         | Pc       | -1.7483 | 0.0010 |
| 294 | P62242 | 40S ribosomal protein S8                                   | Rps8     | -1.7481 | 0.0010 |
| 295 | P15508 | Spectrin beta chain erythrocytic                           | Sptb     | -1.7464 | 0.0010 |
| 296 | P51881 | ADP/ATP translocase 2                                      | Slc25a5  | -1.7439 | 0.0010 |
| 297 | Q6WKZ8 | E3 ubiquitin-protein ligase UBR2                           | Ubr2     | -1.7438 | 0.0010 |
| 298 | Q9CWU6 | Ubiquinol-cytochrome-c reductase complex assembly factor 1 | Uqcc1    | -1.7339 | 0.0010 |
| 299 | P62317 | Small nuclear ribonucleoprotein Sm D2                      | Snrpd2   | -1.7297 | 0.0011 |
| 300 | Q6PIE5 | Sodium/potassium-transporting ATPase subunit alpha-2       | Atp1a2   | -1.7295 | 0.0011 |
| 301 | Q9Z0J4 | Nitric oxide synthase brain                                | Nos1     | -1.7211 | 0.0011 |
| 302 | Q9JJH1 | Ribonuclease 4                                             | Rnase4   | -1.7201 | 0.0011 |
| 303 | Q9D4F2 | Phospholipid phosphatase 6                                 | Plpp6    | -1.7191 | 0.0011 |
| 304 | O08600 | Endonuclease G mitochondrial                               | Endog    | -1.7191 | 0.0011 |
| 305 | Q60994 | Adiponectin                                                | Adipoq   | -1.7191 | 0.0011 |
| 306 | Q5U5V2 | Hydroxylysine kinase                                       | Hykk     | -1.7191 | 0.0011 |
| 307 | P00329 | Alcohol dehydrogenase 1                                    | Adh1     | -1.7191 | 0.0011 |
| 308 | P0C1Q2 | Dual 3' 5'-cyclic-AMP and -GMP phosphodiesterase 11A       | Pde11a   | -1.7191 | 0.0011 |
| 309 | Q8C6M1 | Ubiquitin carboxyl-terminal hydrolase 20                   | Usp20    | -1.7191 | 0.0011 |
| 310 | Q8VCC8 | Rap guanine nucleotide exchange factor 3                   | Rapgef3  | -1.7163 | 0.0011 |
| 311 | Q80YX1 | Tenascin                                                   | Tnc      | -1.7146 | 0.0011 |
| 312 | P10922 | Histone H1.0                                               | H1-0     | -1.7129 | 0.0011 |
| 313 | Q9DAM5 | Mitochondrial thiamine pyrophosphate carrier               | Slc25a19 | -1.7099 | 0.0011 |
| 314 | Q9CZL5 | Pterin-4-alpha-carbinolamine dehydratase 2                 | Pcbd2    | -1.7099 | 0.0011 |
| 315 | Q9JLR9 | HIG1 domain family member 1A mitochondrial                 | Higd1a   | -1.7099 | 0.0011 |
| 316 | P48428 | Tubulin-specific chaperone A                               | Tbca     | -1.7099 | 0.0011 |
| 317 | Q99JY9 | Actin-related protein 3                                    | Actr3    | -1.7091 | 0.0011 |
| 318 | Q8JZQ9 | Eukaryotic translation initiation factor 3 subunit B       | Eif3b    | -1.7073 | 0.0011 |
| 319 | Q7TQD2 | Tubulin polymerization-promoting protein                   | Tppp     | -1.7046 | 0.0011 |
| 320 | Q9D1G1 | Ras-related protein Rab-1B                                 | Rab1b    | -1.6951 | 0.0011 |
| 321 | P67778 | Prohibitin                                                 | Phb      | -1.6900 | 0.0011 |
| 322 | P06801 | NADP-dependent malic enzyme                                | Me1      | -1.6891 | 0.0011 |
| 323 | Q80W21 | Glutathione S-transferase Mu 7                             | Gstm7    | -1.6870 | 0.0011 |
| 324 | Q9CYR0 | Single-stranded DNA-binding protein mitochondrial          | Ssbp1    | -1.6861 | 0.0011 |
| 325 | Q2PFD7 | PH and SEC7 domain-containing protein 3                    | Psd3     | -1.6861 | 0.0011 |
| 326 | Q02105 | Complement C1q subcomponent subunit C                      | C1qc     | -1.6839 | 0.0011 |
| 327 | Q9Z1G3 | V-type proton ATPase subunit C 1                           | Atp6v1c1 | -1.6818 | 0.0011 |
| 328 | Q91Z38 | Tetratricopeptide repeat protein 1                         | Ttc1     | -1.6815 | 0.0012 |
| 329 | Q9D1N9 | 39S ribosomal protein L21 mitochondrial                    | Mrpl21   | -1.6815 | 0.0012 |
| 330 | Q8BVI4 | Dihydropteridine reductase                                 | Qdpr     | -1.6813 | 0.0012 |
| 331 | P35700 | Peroxisome oxidoreductin-1                                 | Prdx1    | -1.6783 | 0.0012 |
| 332 | Q9CZT8 | Ras-related protein Rab-3B                                 | Rab3b    | -1.6775 | 0.0012 |
| 333 | P68040 | Receptor of activated protein C kinase 1                   | Rack1    | -1.6769 | 0.0012 |

|     |        |                                                                |          |         |        |
|-----|--------|----------------------------------------------------------------|----------|---------|--------|
| 334 | Q9WUE3 | Transmembrane reductase CYB561D2                               | Cyb561d2 | -1.6732 | 0.0012 |
| 335 | Q99104 | Unconventional myosin-Va                                       | Myo5a    | -1.6732 | 0.0012 |
| 336 | P17156 | Heat shock-related 70 kDa protein 2                            | Hspa2    | -1.6674 | 0.0012 |
| 337 | P28740 | Kinesin-like protein KIF2A                                     | Kif2a    | -1.6671 | 0.0012 |
| 338 | Q3THE2 | Myosin regulatory light chain 12B                              | Myl12b   | -1.6647 | 0.0012 |
| 339 | O08677 | Kininogen-1                                                    | Kng1     | -1.6585 | 0.0012 |
| 340 | Q9JJ69 | Kv channel-interacting protein 2                               | Kcnp2    | -1.6571 | 0.0013 |
| 341 | Q8K097 | Protein lifeguard 2                                            | Faim2    | -1.6571 | 0.0013 |
| 342 | Q9CY00 | Tetratricopeptide repeat protein 30B                           | Ttc30b   | -1.6571 | 0.0013 |
| 343 | Q80U35 | Rho guanine nucleotide exchange factor 17                      | Arhgef17 | -1.6562 | 0.0013 |
| 344 | A2AGT5 | Cytoskeleton-associated protein 5                              | Ckap5    | -1.6555 | 0.0013 |
| 345 | Q60771 | Claudin-11                                                     | Cldn11   | -1.6548 | 0.0013 |
| 346 | P17710 | Hexokinase-1                                                   | Hk1      | -1.6515 | 0.0013 |
| 347 | O55023 | Inositol monophosphatase 1                                     | Impa1    | -1.6501 | 0.0013 |
| 348 | Q5PR73 | GTP-binding protein Di-Ras2                                    | Diras2   | -1.6491 | 0.0013 |
| 349 | Q80XN0 | D-beta-hydroxybutyrate dehydrogenase mitochondrial             | Bdh1     | -1.6481 | 0.0013 |
| 350 | Q9CQI6 | Coactosin-like protein                                         | Cotl1    | -1.6442 | 0.0013 |
| 351 | P35279 | Ras-related protein Rab-6A                                     | Rab6a    | -1.6407 | 0.0013 |
| 352 | Q9QXS6 | Drebrin                                                        | Dbrn1    | -1.6364 | 0.0013 |
| 353 | Q3UHD1 | Adhesion G protein-coupled receptor B1                         | Adgrb1   | -1.6363 | 0.0013 |
| 354 | Q91X97 | Neurocalcin-delta                                              | Ncald    | -1.6287 | 0.0013 |
| 355 | P21614 | Vitamin D-binding protein                                      | Gc       | -1.6276 | 0.0013 |
| 356 | Q61176 | Arginase-1                                                     | Arg1     | -1.6276 | 0.0013 |
| 357 | P63242 | Eukaryotic translation initiation factor 5A-1                  | Eif5a    | -1.6268 | 0.0013 |
| 358 | Q6ZQ38 | Cullin-associated NEDD8-dissociated protein 1                  | Cand1    | -1.6215 | 0.0014 |
| 359 | P62748 | Hippocalcin-like protein 1                                     | Hpcal1   | -1.6208 | 0.0014 |
| 360 | Q8BHZ0 | CYFIP-related Rac1 interactor A                                | Cyria    | -1.6173 | 0.0014 |
| 361 | Q6NVE9 | Protein phosphatase PTC7 homolog                               | Pptc7    | -1.6163 | 0.0014 |
| 362 | Q9WVK4 | EH domain-containing protein 1                                 | Ehd1     | -1.6131 | 0.0014 |
| 363 | Q9QYR6 | Microtubule-associated protein 1A                              | Map1a    | -1.6130 | 0.0014 |
| 364 | Q9DBG5 | Perilipin-3                                                    | Plin3    | -1.6107 | 0.0014 |
| 365 | P35282 | Ras-related protein Rab-21                                     | Rab21    | -1.6096 | 0.0014 |
| 366 | P68373 | Tubulin alpha-1C chain                                         | Tuba1c   | -1.6092 | 0.0014 |
| 367 | P35278 | Ras-related protein Rab-5C                                     | Rab5c    | -1.6083 | 0.0014 |
| 368 | Q9D051 | Pyruvate dehydrogenase E1 component subunit beta mitochondrial | Pdhb     | -1.6068 | 0.0014 |
| 369 | Q8BGY7 | Protein FAM210A                                                | Fam210a  | -1.6028 | 0.0014 |
| 370 | Q6ZPE2 | Myotubularin-related protein 5                                 | Sbf1     | -1.6021 | 0.0014 |
| 371 | Q9CQR2 | 40S ribosomal protein S21                                      | Rps21    | -1.6016 | 0.0014 |
| 372 | Q8BK12 | Trinucleotide repeat-containing gene 6B protein                | Tnrc6b   | -1.6009 | 0.0014 |
| 373 | Q3UVC0 | Kinase suppressor of Ras 2                                     | Ksr2     | -1.6009 | 0.0014 |
| 374 | Q80SY4 | E3 ubiquitin-protein ligase MIB1                               | Mib1     | -1.6009 | 0.0014 |
| 375 | Q99JY4 | TraB domain-containing protein                                 | Trabd    | -1.6009 | 0.0014 |
| 376 | Q8BVA2 | Transmembrane protein 222                                      | Tmem222  | -1.6009 | 0.0014 |
| 377 | O88630 | Golgi SNAP receptor complex member 1                           | Gosr1    | -1.6009 | 0.0014 |
| 378 | P62274 | 40S ribosomal protein S29                                      | Rps29    | -1.6009 | 0.0014 |
| 379 | Q9CQX0 | Ubiquitin thioesterase OTUB2                                   | Otub2    | -1.6009 | 0.0014 |
| 380 | Q60675 | Laminin subunit alpha-2                                        | Lama2    | -1.6002 | 0.0014 |
| 381 | P01638 | Ig kappa chain V-V region L6 (Fragment)                        | 4 SV     | -1.6002 | 0.0014 |
| 382 | P01637 | Ig kappa chain V-V region T1                                   | 4 SV     | -1.6002 | 0.0014 |
| 383 | Q9D2G5 | Synaptojanin-2                                                 | Synj2    | -1.6002 | 0.0014 |
| 384 | Q58A65 | C-Jun-amino-terminal kinase-interacting protein 4              | Spag9    | -1.5994 | 0.0014 |
| 385 | P68369 | Tubulin alpha-1A chain                                         | Tuba1a   | -1.5940 | 0.0015 |
| 386 | Q8CF66 | Ragulator complex protein LAMTOR4                              | Lamtor4  | -1.5917 | 0.0015 |
| 387 | P29391 | Ferritin light chain 1                                         | Ftl1     | -1.5903 | 0.0015 |
| 388 | Q9D1E6 | Tubulin-folding cofactor B                                     | Tbcb     | -1.5886 | 0.0015 |
| 389 | Q62348 | Translin                                                       | Tsn      | -1.5848 | 0.0015 |
| 390 | Q99L43 | Phosphatidate cytidyltransferase 2                             | Cds2     | -1.5811 | 0.0015 |
| 391 | Q60936 | Atypical kinase COQ8A mitochondrial                            | Coq8a    | -1.5797 | 0.0015 |
| 392 | O55074 | A-kinase anchor protein 7 isoform alpha                        | Akap7    | -1.5712 | 0.0015 |
| 393 | Q7TN79 | A-kinase anchor protein 7 isoform gamma                        | Akap7    | -1.5712 | 0.0015 |
| 394 | P32261 | Antithrombin-III                                               | Serpinc1 | -1.5688 | 0.0015 |
| 395 | Q9CPP6 | NADH dehydrogenase [ubiquinone] 1 alpha subcomplex subunit 5   | Ndufa5   | -1.5688 | 0.0015 |
| 396 | Q8K4J6 | Myocardin-related transcription factor A                       | Mrtfa    | -1.5600 | 0.0017 |
| 397 | P61022 | Calcineurin B homologous protein 1                             | Chp1     | -1.5600 | 0.0017 |
| 398 | Q8COD4 | Rho GTPase-activating protein 12                               | Arhgap12 | -1.5600 | 0.0017 |
| 399 | Q8BGB7 | Enolase-phosphatase E1                                         | Enoph1   | -1.5600 | 0.0017 |
| 400 | Q3TX08 | tRNA (guanine(26)-N(2))-dimethyltransferase                    | Trmt1    | -1.5600 | 0.0017 |

|     |        |                                                              |           |         |        |
|-----|--------|--------------------------------------------------------------|-----------|---------|--------|
| 401 | P20491 | High affinity immunoglobulin epsilon receptor subunit gamma  | Fcer1g    | -1.5600 | 0.0017 |
| 402 | Q9JHL1 | Na(+)/H(+) exchange regulatory cofactor NHE-RF2              | Slc9a3r2  | -1.5586 | 0.0017 |
| 403 | P58059 | 28S ribosomal protein S21 mitochondrial                      | Mrps21    | -1.5586 | 0.0017 |
| 404 | Q6X893 | Choline transporter-like protein 1                           | Slc44a1   | -1.5574 | 0.0017 |
| 405 | Q62442 | Vesicle-associated membrane protein 1                        | Vamp1     | -1.5494 | 0.0018 |
| 406 | Q9D6J6 | NADH dehydrogenase [ubiquinone] flavoprotein 2 mitochondrial | Ndufv2    | -1.5470 | 0.0018 |
| 407 | Q9CQW1 | Synaptobrevin homolog YKT6                                   | Ykt6      | -1.5459 | 0.0018 |
| 408 | P42859 | Huntingtin                                                   | Htt       | -1.5413 | 0.0018 |
| 409 | G3XA57 | Rab11 family-interacting protein 2                           | Rab11fip2 | -1.5381 | 0.0019 |
| 410 | Q9CQZ5 | NADH dehydrogenase [ubiquinone] 1 alpha subcomplex subunit 6 | Ndufa6    | -1.5376 | 0.0019 |
| 411 | P97315 | Cysteine and glycine-rich protein 1                          | Csrp1     | -1.5369 | 0.0019 |
| 412 | P13020 | Gelsolin                                                     | Gsn       | -1.5339 | 0.0019 |
| 413 | P97333 | Neuropilin-1                                                 | Nrp1      | -1.5333 | 0.0019 |
| 414 | Q6ZWU9 | 40S ribosomal protein S27                                    | Rps27     | -1.5328 | 0.0019 |
| 415 | Q9JI91 | Alpha-actinin-2                                              | Actn2     | -1.5326 | 0.0019 |
| 416 | P49615 | Cyclin-dependent-like kinase 5                               | Cdk5      | -1.5305 | 0.0019 |
| 417 | Q8CCN5 | BCAS3 microtubule associated cell migration factor           | Bcas3     | -1.5274 | 0.0020 |
| 418 | Q35988 | Syndecan-4                                                   | Sdc4      | -1.5220 | 0.0020 |
| 419 | Q3ZK22 | Vezatin                                                      | Vezt      | -1.5196 | 0.0020 |
| 420 | A2AKG8 | Focadhesin                                                   | Focad     | -1.5196 | 0.0020 |
| 421 | Q9EQC5 | N-terminal kinase-like protein                               | Scyl1     | -1.5192 | 0.0020 |
| 422 | Q8BT60 | Copine-3                                                     | Cpne3     | -1.5160 | 0.0020 |
| 423 | Q8BP47 | Asparagine--tRNA ligase cytoplasmic                          | NARS1     | -1.5135 | 0.0020 |
| 424 | Q61206 | Platelet-activating factor acetylhydrolase IB subunit alpha2 | Pafah1b2  | -1.5111 | 0.0020 |
| 425 | P70206 | Plexin-A1                                                    | Plxna1    | -1.5106 | 0.0020 |
| 426 | Q8BR63 | Protein FAM177A1                                             | Fam177a1  | -1.5087 | 0.0020 |
| 427 | Q9D1H8 | 39S ribosomal protein L53 mitochondrial                      | Mrpl53    | -1.5086 | 0.0020 |
| 428 | Q9CWW6 | Peptidyl-prolyl cis-trans isomerase NIMA-interacting 4       | Pin4      | -1.5086 | 0.0020 |
| 429 | P56382 | ATP synthase subunit epsilon mitochondrial                   | Atp5f1e   | -1.5086 | 0.0020 |
| 430 | Q9CR27 | WASH complex subunit 3                                       | Washc3    | -1.5086 | 0.0020 |
| 431 | P70335 | Rho-associated protein kinase 1                              | Rock1     | -1.5084 | 0.0020 |
| 432 | Q9DCS9 | NADH dehydrogenase [ubiquinone] 1 beta subcomplex subunit 10 | Ndufb10   | -1.5071 | 0.0020 |
| 433 | Q8BUH8 | Sentrin-specific protease 7                                  | Senp7     | -1.5059 | 0.0020 |
| 434 | Q00623 | Apolipoprotein A-I                                           | Apoa1     | -1.5055 | 0.0020 |
| 435 | Q8VHK5 | Membrane protein MLC1                                        | Mlc1      | -1.5052 | 0.0020 |
| 436 | Q9CPV4 | Glyoxalase domain-containing protein 4                       | Glod4     | -1.5042 | 0.0020 |
| 437 | Q71LX4 | Talin-2                                                      | Tln2      | -1.4992 | 0.0021 |
| 438 | Q3V300 | Kinesin-like protein KIF22                                   | Kif22     | -1.4981 | 0.0021 |
| 439 | G3X9J0 | Signal-induced proliferation-associated 1-like protein 3     | Sipa1l3   | -1.4963 | 0.0021 |
| 440 | P35979 | 60S ribosomal protein L12                                    | Rpl12     | -1.4944 | 0.0021 |
| 441 | P70398 | Probable ubiquitin carboxyl-terminal hydrolase FAF-X         | Usp9x     | -1.4883 | 0.0021 |
| 442 | Q8BFY6 | Peflin                                                       | Pef1      | -1.4808 | 0.0021 |
| 443 | Q8VCC9 | Spondin-1                                                    | Spon1     | -1.4795 | 0.0021 |
| 444 | Q80W93 | Hydrocephalus-inducing protein                               | Hydin     | -1.4791 | 0.0022 |
| 445 | Q8ROP4 | Mth938 domain-containing protein                             | Aamdc     | -1.4739 | 0.0022 |
| 446 | Q9Z239 | Phospholemman                                                | Fxyd1     | -1.4739 | 0.0022 |
| 447 | P58771 | Tropomyosin alpha-1 chain                                    | Tpm1      | -1.4676 | 0.0023 |
| 448 | Q6R891 | Neurabin-2                                                   | Ppp1r9b   | -1.4665 | 0.0023 |
| 449 | P24270 | Catalase                                                     | Cat       | -1.4609 | 0.0023 |
| 450 | Q80U95 | Ubiquitin-protein ligase E3C                                 | Ube3c     | -1.4595 | 0.0023 |
| 451 | P48771 | Cytochrome c oxidase subunit 7A2 mitochondrial               | Cox7a2    | -1.4564 | 0.0025 |
| 452 | P20918 | Plasminogen                                                  | Plg       | -1.4560 | 0.0025 |
| 453 | Q9CPT3 | N-acylneuraminase-9-phosphatase                              | Nanp      | -1.4560 | 0.0025 |
| 454 | O88343 | Electrogenic sodium bicarbonate cotransporter 1              | Slc4a4    | -1.4536 | 0.0025 |
| 455 | Q8K215 | LYR motif-containing protein 4                               | Lym4      | -1.4534 | 0.0025 |
| 456 | P70406 | Mitochondrial uncoupling protein 2                           | Ucp2      | -1.4534 | 0.0025 |
| 457 | P10639 | Thioredoxin                                                  | Txn       | -1.4519 | 0.0025 |
| 458 | Q8C5W0 | Calmin                                                       | Clmn      | -1.4470 | 0.0026 |
| 459 | Q9WU63 | Heme-binding protein 2                                       | Hebp2     | -1.4470 | 0.0026 |
| 460 | O70404 | Vesicle-associated membrane protein 8                        | Vamp8     | -1.4470 | 0.0026 |
| 461 | P70158 | Acid sphingomyelinase-like phosphodiesterase 3a              | Smpdl3a   | -1.4470 | 0.0026 |
| 462 | P56812 | Programmed cell death protein 5                              | Pdcd5     | -1.4470 | 0.0026 |
| 463 | P13597 | Intercellular adhesion molecule 1                            | Icam1     | -1.4470 | 0.0026 |
| 464 | P62700 | Protein yippee-like 5                                        | Ypel5     | -1.4470 | 0.0026 |
| 465 | P45878 | Peptidyl-prolyl cis-trans isomerase FKBP2                    | Fkbp2     | -1.4470 | 0.0026 |
| 466 | P49935 | Pro-cathepsin H                                              | Ctsh      | -1.4470 | 0.0026 |
| 467 | Q7TMK6 | Protein Hook homolog 2                                       | Hook2     | -1.4470 | 0.0026 |



|     |        |                                                                         |          |         |        |
|-----|--------|-------------------------------------------------------------------------|----------|---------|--------|
| 468 | Q505B7 | Protein archease                                                        | Zbtb8os  | -1.4470 | 0.0026 |
| 469 | POC6F1 | Dynein axonemal heavy chain 2                                           | Dnah2    | -1.4470 | 0.0026 |
| 470 | Q9JHW2 | Omega-amidase NIT2                                                      | Nit2     | -1.4386 | 0.0026 |
| 471 | Q9DBJ1 | Phosphoglycerate mutase 1                                               | Pgam1    | -1.4365 | 0.0027 |
| 472 | P08551 | Neurofilament light polypeptide                                         | Nefl     | -1.4364 | 0.0027 |
| 473 | Q8C052 | Microtubule-associated protein 1S                                       | Map1s    | -1.4318 | 0.0027 |
| 474 | P68368 | Tubulin alpha-4A chain                                                  | Tuba4a   | -1.4313 | 0.0027 |
| 475 | Q08460 | Calcium-activated potassium channel subunit alpha-1                     | Kcnma1   | -1.4274 | 0.0027 |
| 476 | P02468 | Laminin subunit gamma-1                                                 | Lamc1    | -1.4261 | 0.0027 |
| 477 | Q9WVL6 | Exostosin-like 3                                                        | Extl3    | -1.4253 | 0.0027 |
| 478 | P53798 | Squalene synthase                                                       | Fdft1    | -1.4222 | 0.0027 |
| 479 | Q60625 | Intercellular adhesion molecule 5                                       | Icam5    | -1.4212 | 0.0027 |
| 480 | Q9JHD1 | Histone acetyltransferase KAT2B                                         | Kat2b    | -1.4188 | 0.0028 |
| 481 | Q8VCT9 | Dual specificity testis-specific protein kinase 2                       | Tesk2    | -1.4174 | 0.0028 |
| 482 | Q6WQJ1 | Diacylglycerol lipase-alpha                                             | Dagla    | -1.4115 | 0.0028 |
| 483 | Q9CQ92 | Mitochondrial fission 1 protein                                         | Fis1     | -1.4106 | 0.0028 |
| 484 | O35250 | Exocyst complex component 7                                             | Exoc7    | -1.4104 | 0.0028 |
| 485 | Q5EG47 | 5'-AMP-activated protein kinase catalytic subunit alpha-1               | Prkaa1   | -1.4038 | 0.0029 |
| 486 | P59997 | Lysine-specific demethylase 2A                                          | Kdm2a    | -1.4005 | 0.0029 |
| 487 | Q9WV68 | Peroxisomal 2 4-dienoyl-CoA reductase [(3E)-enoyl-CoA-producing]        | Decr2    | -1.4000 | 0.0029 |
| 488 | Q9D0W5 | Peptidyl-prolyl cis-trans isomerase-like 1                              | Ppil1    | -1.3996 | 0.0029 |
| 489 | Q8BW55 | G protein-regulated inducer of neurite outgrowth 3                      | Gprin3   | -1.3989 | 0.0029 |
| 490 | Q6P9K9 | Neurexin-3                                                              | Nrxn3    | -1.3952 | 0.0029 |
| 491 | Q6NVE8 | WD repeat-containing protein 44                                         | Wdr44    | -1.3946 | 0.0029 |
| 492 | Q9CYG7 | Mitochondrial import receptor subunit TOM34                             | Tomm34   | -1.3944 | 0.0029 |
| 493 | Q9Z2R6 | Protein unc-119 homolog A                                               | Unc119   | -1.3943 | 0.0029 |
| 494 | Q8R0F8 | Acylpyruvase FAHD1 mitochondrial                                        | Fahd1    | -1.3943 | 0.0029 |
| 495 | P18826 | Phosphorylase b kinase regulatory subunit alpha skeletal muscle isoform | Phka1    | -1.3887 | 0.0030 |
| 496 | P47754 | F-actin-capping protein subunit alpha-2                                 | Capza2   | -1.3858 | 0.0030 |
| 497 | Q80X95 | Ras-related GTP-binding protein A                                       | Rraga    | -1.3830 | 0.0030 |
| 498 | P63017 | Heat shock cognate 71 kDa protein                                       | Hspa8    | -1.3824 | 0.0030 |
| 499 | Q99LS3 | Phosphoserine phosphatase                                               | Psph     | -1.3819 | 0.0030 |
| 500 | Q9D8Y1 | Transmembrane protein 126A                                              | Tmem126a | -1.3810 | 0.0030 |
| 501 | P97470 | Serine/threonine-protein phosphatase 4 catalytic subunit                | Ppp4c    | -1.3797 | 0.0031 |
| 502 | P17182 | Alpha-enolase                                                           | Eno1     | -1.3797 | 0.0031 |
| 503 | P62821 | Ras-related protein Rab-1A                                              | Rab1A    | -1.3795 | 0.0031 |
| 504 | Q8BKN5 | Gamma-tubulin complex component 5                                       | Tubgcp5  | -1.3782 | 0.0031 |
| 505 | Q9Z1Z0 | General vesicular transport factor p115                                 | Uso1     | -1.3765 | 0.0031 |
| 506 | O89112 | Glutathione S-transferase LANCL1                                        | Lancl1   | -1.3757 | 0.0031 |
| 507 | Q91Z69 | SLIT-ROBO Rho GTPase-activating protein 1                               | Srgap1   | -1.3754 | 0.0031 |
| 508 | P09528 | Ferritin heavy chain                                                    | Fth1     | -1.3749 | 0.0031 |
| 509 | Q6PH08 | ERC protein 2                                                           | Erc2     | -1.3744 | 0.0031 |
| 510 | Q99KC8 | von Willebrand factor A domain-containing protein 5A                    | Vwa5a    | -1.3740 | 0.0031 |
| 511 | P31648 | Sodium- and chloride-dependent GABA transporter 1                       | Slc6a1   | -1.3732 | 0.0031 |
| 512 | Q8VH51 | RNA-binding protein 39                                                  | Rbm39    | -1.3716 | 0.0031 |
| 513 | Q920P5 | Adenylate kinase isoenzyme 5                                            | Ak5      | -1.3698 | 0.0031 |
| 514 | P61458 | Pterin-4-alpha-carbinolamine dehydratase                                | Pcbd1    | -1.3672 | 0.0031 |
| 515 | P97855 | Ras GTPase-activating protein-binding protein 1                         | G3bp1    | -1.3671 | 0.0031 |
| 516 | Q64520 | Guanylate kinase                                                        | Guk1     | -1.3668 | 0.0031 |
| 517 | P35123 | Ubiquitin carboxyl-terminal hydrolase 4                                 | Usp4     | -1.3647 | 0.0032 |
| 518 | Q8VE09 | Tetratricopeptide repeat protein 39C                                    | Ttc39c   | -1.3624 | 0.0033 |
| 519 | P47746 | Cannabinoid receptor 1                                                  | Cnr1     | -1.3624 | 0.0033 |
| 520 | Q7TNM2 | Tripartite motif-containing protein 46                                  | Trim46   | -1.3616 | 0.0033 |
| 521 | Q9Z2X1 | Heterogeneous nuclear ribonucleoprotein F                               | Hnrnpf   | -1.3602 | 0.0033 |
| 522 | O35239 | Tyrosine-protein phosphatase non-receptor type 9                        | Ptpn9    | -1.3565 | 0.0033 |
| 523 | P13707 | Glycerol-3-phosphate dehydrogenase [NAD(+)] cytoplasmic                 | Gpd1     | -1.3472 | 0.0035 |
| 524 | A2AJA9 | Apical junction component 1 homolog                                     | Ajm1     | -1.3463 | 0.0035 |
| 525 | Q1RLL3 | Copine-9                                                                | Cpne9    | -1.3453 | 0.0035 |
| 526 | Q61838 | Pregnancy zone protein                                                  | Pzp      | -1.3446 | 0.0035 |
| 527 | P62754 | 40S ribosomal protein S6                                                | Rps6     | -1.3435 | 0.0035 |
| 528 | Q9D882 | Protein FAM241B                                                         | Fam241b  | -1.3434 | 0.0035 |
| 529 | Q8BGS2 | BOLA-like protein 2                                                     | Bola2    | -1.3434 | 0.0035 |
| 530 | P62984 | Ubiquitin-60S ribosomal protein L40                                     | Uba52    | -1.3392 | 0.0035 |
| 531 | O70503 | Very-long-chain 3-oxoacyl-CoA reductase                                 | Hsd17b12 | -1.3391 | 0.0035 |
| 532 | P49452 | Centromere protein C                                                    | Cenpc    | -1.3361 | 0.0036 |
| 533 | P31650 | Sodium- and chloride-dependent GABA transporter 3                       | Slc6a11  | -1.3338 | 0.0036 |

|     |        |                                                                             |          |         |        |
|-----|--------|-----------------------------------------------------------------------------|----------|---------|--------|
| 534 | Q9Z224 | Molybdopter in synthase sulfur carrier subunit                              | Mocs2    | -1.3335 | 0.0036 |
| 535 | Q9CQQ0 | Small integral membrane protein 8                                           | Smim8    | -1.3335 | 0.0036 |
| 536 | Q80YA3 | Phospholipase DDHD1                                                         | Ddhd1    | -1.3319 | 0.0036 |
| 537 | Q8BZA9 | Fructose-2 6-bisphosphatase TIGAR                                           | Tigar    | -1.3319 | 0.0036 |
| 538 | Q8BTU1 | Cilia- and flagella-associated protein 20                                   | Cfap20   | -1.3313 | 0.0036 |
| 539 | P55200 | Histone-lysine N-methyltransferase 2A                                       | Kmt2a    | -1.3312 | 0.0036 |
| 540 | Q7TMC8 | L-fucose kinase                                                             | Fcsk     | -1.3294 | 0.0036 |
| 541 | Q9CR30 | Josephin-2                                                                  | Josd2    | -1.3254 | 0.0037 |
| 542 | P20357 | Microtubule-associated protein 2                                            | Map2     | -1.3252 | 0.0037 |
| 543 | Q8BH59 | Calcium-binding mitochondrial carrier protein Aralar1                       | Slc25a12 | -1.3210 | 0.0038 |
| 544 | Q9CTY5 | Calcium uptake protein 3 mitochondrial                                      | Micu3    | -1.3201 | 0.0038 |
| 545 | P56371 | Ras-related protein Rab-4A                                                  | Rab4a    | -1.3193 | 0.0038 |
| 546 | Q3UMR5 | Calcium uniporter protein mitochondrial                                     | Mcu      | -1.3176 | 0.0038 |
| 547 | Q5NC83 | Spermatogenesis-associated protein 48                                       | Spata48  | -1.3172 | 0.0038 |
| 548 | Q8BYB9 | Protein O-glycosyltransferase 1                                             | Poglut1  | -1.3170 | 0.0038 |
| 549 | Q8CCJ4 | APC membrane recruitment protein 2                                          | Amer2    | -1.3170 | 0.0038 |
| 550 | Q60857 | Sodium-dependent serotonin transporter                                      | Slc6a4   | -1.3170 | 0.0038 |
| 551 | Q80VJ3 | 2'-deoxynucleoside 5'-phosphate N-hydrolase 1                               | Dnph1    | -1.3170 | 0.0038 |
| 552 | Q9D0K0 | TBC1 domain family member 7                                                 | Tbc1d7   | -1.3170 | 0.0038 |
| 553 | Q9QYI4 | DnaJ homolog subfamily B member 12                                          | Dnajb12  | -1.3170 | 0.0038 |
| 554 | P11862 | Growth arrest-specific protein 2                                            | Gas2     | -1.3170 | 0.0038 |
| 555 | Q9CXV9 | DCN1-like protein 5                                                         | Dcun1d5  | -1.3170 | 0.0038 |
| 556 | Q9DCL2 | Cytosolic iron-sulfur assembly component 2A                                 | Ciao2a   | -1.3170 | 0.0038 |
| 557 | Q91W53 | Golgin subfamily A member 7                                                 | Golga7   | -1.3170 | 0.0038 |
| 558 | Q8VHZ7 | U3 small nucleolar ribonucleoprotein protein IMP4                           | Imp4     | -1.3170 | 0.0038 |
| 559 | Q3UNA4 | NTF2-related export protein 2                                               | Nxt2     | -1.3170 | 0.0038 |
| 560 | Q8C460 | ERI1 exoribonuclease 3                                                      | Eri3     | -1.3160 | 0.0038 |
| 561 | Q9WVQ1 | Membrane-associated guanylate kinase WW and PDZ domain-containing protein 2 | Magi2    | -1.3141 | 0.0038 |
| 562 | Q8CCB4 | Vacuolar protein sorting-associated protein 53 homolog                      | Vps53    | -1.3114 | 0.0039 |
| 563 | O70496 | H(+)/Cl(-) exchange transporter 7                                           | Clcn7    | -1.3080 | 0.0039 |
| 564 | Q925N0 | Sideroflexin-5                                                              | Sfxn5    | -1.3060 | 0.0040 |
| 565 | Q61809 | Leucine-rich repeat neuronal protein 1                                      | Lrrn1    | -1.3051 | 0.0040 |
| 566 | Q7M759 | Alpha/beta hydrolase domain-containing protein 17B                          | Abhd17b  | -1.3051 | 0.0040 |
| 567 | Q3UHD9 | Arf-GAP with GTPase ANK repeat and PH domain-containing protein 2           | Agap2    | -1.3015 | 0.0040 |
| 568 | Q91WG2 | Rab GTPase-binding effector protein 2                                       | Rabep2   | -1.2983 | 0.0050 |
| 569 | P21271 | Unconventional myosin-Vb                                                    | Myo5b    | -1.2982 | 0.0050 |
| 570 | Q921M4 | Golgin subfamily A member 2                                                 | Golga2   | -1.2978 | 0.0050 |
| 571 | Q8R2Y8 | Peptidyl-tRNA hydrolase 2 mitochondrial                                     | Pthr2    | -1.2978 | 0.0050 |
| 572 | P02463 | Collagen alpha-1(IV) chain                                                  | Col4a1   | -1.2978 | 0.0050 |
| 573 | Q9D0T1 | NHP2-like protein 1                                                         | Snu13    | -1.2978 | 0.0050 |
| 574 | Q9WVA2 | Mitochondrial import inner membrane translocase subunit Tim8 A              | Timm8a1  | -1.2978 | 0.0050 |
| 575 | O55102 | Biogenesis of lysosome-related organelles complex 1 subunit 1               | Bloc1s1  | -1.2978 | 0.0050 |
| 576 | Q9QZD8 | Mitochondrial dicarboxylate carrier                                         | Slc25a10 | -1.2967 | 0.0050 |
| 577 | Q61885 | Myelin-oligodendrocyte glycoprotein                                         | Mog      | -1.2954 | 0.0051 |
| 578 | Q99L45 | Eukaryotic translation initiation factor 2 subunit 2                        | Eif2s2   | -1.2944 | 0.0051 |
| 579 | P98086 | Complement C1q subcomponent subunit A                                       | C1qa     | -1.2944 | 0.0051 |
| 580 | Q9CXZ1 | NADH dehydrogenase [ubiquinone] iron-sulfur protein 4 mitochondrial         | Ndufs4   | -1.2944 | 0.0051 |
| 581 | O70133 | ATP-dependent RNA helicase A                                                | Dhx9     | -1.2935 | 0.0051 |
| 582 | Q8C963 | Coiled-coil domain-containing protein 159                                   | Ccdc159  | -1.2919 | 0.0051 |
| 583 | Q9CX54 | Centromere protein V                                                        | Cenpv    | -1.2898 | 0.0051 |
| 584 | Q9QUJ7 | Long-chain-fatty-acid--CoA ligase 4                                         | Acsl4    | -1.2863 | 0.0051 |
| 585 | P28660 | Nck-associated protein 1                                                    | Nckap1   | -1.2862 | 0.0052 |
| 586 | Q99LC8 | Translation initiation factor eIF-2B subunit alpha                          | Eif2b1   | -1.2836 | 0.0052 |
| 587 | Q3UZP4 | Small VCP/p97-interacting protein                                           | Svip     | -1.2836 | 0.0052 |
| 588 | G5E829 | Plasma membrane calcium-transporting ATPase 1                               | Atp2b1   | -1.2824 | 0.0052 |
| 589 | Q07813 | Apoptosis regulator BAX                                                     | Bax      | -1.2789 | 0.0053 |
| 590 | Q3UQ44 | Ras GTPase-activating-like protein IQGAP2                                   | Iqgap2   | -1.2757 | 0.0053 |
| 591 | Q8BTY2 | Sodium bicarbonate cotransporter 3                                          | Slc4a7   | -1.2754 | 0.0053 |
| 592 | Q99K10 | Neuroigin-1                                                                 | Nlgn1    | -1.2754 | 0.0053 |
| 593 | B1AQJ2 | Ubiquitin carboxyl-terminal hydrolase 36                                    | Usp36    | -1.2750 | 0.0053 |
| 594 | Q9R1P4 | Proteasome subunit alpha type-1                                             | Psm1     | -1.2744 | 0.0053 |
| 595 | P12970 | 60S ribosomal protein L7a                                                   | Rpl7a    | -1.2701 | 0.0054 |
| 596 | Q8BJY1 | 26S proteasome non-ATPase regulatory subunit 5                              | Psm5     | -1.2701 | 0.0054 |
| 597 | P0CG50 | Polyubiquitin-C                                                             | Ubc      | -1.2698 | 0.0055 |
| 598 | P0CG49 | Polyubiquitin-B                                                             | Ubb      | -1.2698 | 0.0055 |
| 599 | P47743 | Metabotropic glutamate receptor 8                                           | Grm8     | -1.2672 | 0.0055 |

|     |        |                                                                     |          |         |        |
|-----|--------|---------------------------------------------------------------------|----------|---------|--------|
| 600 | Q3UUI3 | Acyl-coenzyme A thioesterase THEM4                                  | Them4    | -1.2665 | 0.0055 |
| 601 | Q3UHK1 | Proton myo-inositol cotransporter                                   | Slc2a13  | -1.2665 | 0.0055 |
| 602 | Q3UPL0 | Protein transport protein Sec31A                                    | Sec31a   | -1.2642 | 0.0056 |
| 603 | P0C673 | Immunoglobulin superfamily member 11                                | Igsf11   | -1.2635 | 0.0056 |
| 604 | P62315 | Small nuclear ribonucleoprotein Sm D1                               | Snrpd1   | -1.2635 | 0.0056 |
| 605 | Q5U4C1 | G-protein coupled receptor-associated sorting protein 1             | Gprasp1  | -1.2635 | 0.0056 |
| 606 | Q9JK38 | Glucosamine 6-phosphate N-acetyltransferase                         | Gnpnat1  | -1.2635 | 0.0056 |
| 607 | Q91YR9 | Prostaglandin reductase 1                                           | Ptgr1    | -1.2635 | 0.0056 |
| 608 | Q91ZW2 | GDP-fucose protein O-fucosyltransferase 1                           | Pofut1   | -1.2635 | 0.0056 |
| 609 | Q8K245 | UV radiation resistance-associated protein                          | Uvrag    | -1.2635 | 0.0056 |
| 610 | P28828 | Receptor-type tyrosine-protein phosphatase mu                       | Ptprm    | -1.2635 | 0.0056 |
| 611 | Q61127 | NGFI-A-binding protein 2                                            | Nab2     | -1.2635 | 0.0056 |
| 612 | Q9WTS4 | Teneurin-1                                                          | Tenm1    | -1.2634 | 0.0056 |
| 613 | Q920N7 | Synaptotagmin-12                                                    | Syt12    | -1.2575 | 0.0057 |
| 614 | Q62393 | Tumor protein D52                                                   | Tpd52    | -1.2547 | 0.0057 |
| 615 | Q80Y56 | Rabensyn-5                                                          | Rbsn     | -1.2522 | 0.0058 |
| 616 | Q9JKR6 | Hypoxia up-regulated protein 1                                      | Hyou1    | -1.2485 | 0.0058 |
| 617 | Q9JKC6 | Cell cycle exit and neuronal differentiation protein 1              | Cend1    | -1.2483 | 0.0058 |
| 618 | Q8BW96 | Calcium/calmodulin-dependent protein kinase type 1D                 | Camk1d   | -1.2461 | 0.0059 |
| 619 | Q8VDN2 | Sodium/potassium-transporting ATPase subunit alpha-1                | Atp1a1   | -1.2460 | 0.0059 |
| 620 | P42932 | T-complex protein 1 subunit theta                                   | Cct8     | -1.2452 | 0.0059 |
| 621 | Q61771 | Kinesin-like protein KIF3B                                          | Kif3b    | -1.2451 | 0.0059 |
| 622 | Q9DCT2 | NADH dehydrogenase [ubiquinone] iron-sulfur protein 3 mitochondrial | Ndufs3   | -1.2406 | 0.0060 |
| 623 | P62983 | Ubiquitin-40S ribosomal protein S27a                                | Rps27a   | -1.2378 | 0.0061 |
| 624 | Q60870 | Receptor expression-enhancing protein 5                             | Reep5    | -1.2358 | 0.0061 |
| 625 | Q91W86 | Vacuolar protein sorting-associated protein 11 homolog              | Vps11    | -1.2325 | 0.0061 |
| 626 | Q91Z23 | Beta-synuclein                                                      | Sncb     | -1.2325 | 0.0061 |
| 627 | Q8C2E7 | WASH complex subunit 5                                              | Washc5   | -1.2324 | 0.0061 |
| 628 | Q7TME0 | 2-lysophosphatidate phosphatase PLPPR4                              | Plppr4   | -1.2300 | 0.0061 |
| 629 | P08226 | Apolipoprotein E                                                    | ApoE     | -1.2294 | 0.0062 |
| 630 | Q8BTH8 | Casein kinase I isoform gamma-1                                     | Csnk1g1  | -1.2269 | 0.0062 |
| 631 | O70152 | Dolichol-phosphate mannosyltransferase subunit 1                    | Dpm1     | -1.2269 | 0.0062 |
| 632 | Q5SWU9 | Acetyl-CoA carboxylase 1                                            | Acaca    | -1.2265 | 0.0062 |
| 633 | Q8BH61 | Coagulation factor XIII A chain                                     | F13a1    | -1.2235 | 0.0062 |
| 634 | O88384 | Vesicle transport through interaction with t-SNAREs homolog 1B      | Vti1b    | -1.2235 | 0.0062 |
| 635 | Q99J99 | 3-mercaptopyruvate sulfurtransferase                                | Mpst     | -1.2235 | 0.0062 |
| 636 | Q80UP3 | Diacylglycerol kinase zeta                                          | Dgkz     | -1.2229 | 0.0063 |
| 637 | P63213 | Guanine nucleotide-binding protein G(I)/G(S)/G(O) subunit gamma-2   | Gng2     | -1.2217 | 0.0063 |
| 638 | P62075 | Mitochondrial import inner membrane translocase subunit Tim13       | Timm13   | -1.2215 | 0.0063 |
| 639 | Q9DCJ5 | NADH dehydrogenase [ubiquinone] 1 alpha subcomplex subunit 8        | Ndufa8   | -1.2178 | 0.0064 |
| 640 | Q9Z351 | Potassium voltage-gated channel subfamily KQT member 2              | Kcnq2    | -1.2137 | 0.0064 |
| 641 | Q504M8 | Ras-related protein Rab-26                                          | Rab26    | -1.2094 | 0.0067 |
| 642 | P61957 | Small ubiquitin-related modifier 2                                  | Sumo2    | -1.2079 | 0.0067 |
| 643 | Q9Z172 | Small ubiquitin-related modifier 3                                  | Sumo3    | -1.2079 | 0.0067 |
| 644 | Q61282 | Aggrecan core protein                                               | Acan     | -1.2078 | 0.0067 |
| 645 | Q9WVA4 | Transgelin-2                                                        | Tagln2   | -1.2066 | 0.0067 |
| 646 | Q8BG40 | Katanin p80 WD40 repeat-containing subunit B1                       | Katnb1   | -1.2057 | 0.0067 |
| 647 | Q6P9R4 | Rho guanine nucleotide exchange factor 18                           | Arhgef18 | -1.2028 | 0.0068 |
| 648 | O35215 | D-dopachrome decarboxylase                                          | Ddt      | -1.2028 | 0.0068 |
| 649 | Q61510 | E3 ubiquitin/ISG15 ligase TRIM25                                    | Trim25   | -1.2028 | 0.0068 |
| 650 | Q9Z103 | Activity-dependent neuroprotector homeobox protein                  | Adnp     | -1.2028 | 0.0068 |
| 651 | P11103 | Poly [ADP-ribose] polymerase 1                                      | Parp1    | -1.2026 | 0.0068 |
| 652 | P53994 | Ras-related protein Rab-2A                                          | Rab2a    | -1.2019 | 0.0068 |
| 653 | Q60631 | Growth factor receptor-bound protein 2                              | Grb2     | -1.2016 | 0.0068 |
| 654 | Q924T2 | 28S ribosomal protein S2 mitochondrial                              | Mrps2    | -1.2015 | 0.0068 |
| 655 | Q8BI72 | CDKN2A-interacting protein                                          | Cdkn2aip | -1.2015 | 0.0068 |
| 656 | Q9CQ74 | Leptin receptor overlapping transcript-like 1                       | Leprotl1 | -1.2015 | 0.0068 |
| 657 | P10605 | Cathepsin B                                                         | Ctsb     | -1.2009 | 0.0068 |
| 658 | Q9CPY7 | Cytosol aminopeptidase                                              | Lap3     | -1.2001 | 0.0068 |
| 659 | Q8C129 | Leucyl-cystinyl aminopeptidase                                      | Lnpep    | -1.1984 | 0.0069 |
| 660 | P97371 | Proteasome activator complex subunit 1                              | Psme1    | -1.1984 | 0.0069 |
| 661 | Q9EPR5 | VPS10 domain-containing receptor SorCS2                             | Sorcs2   | -1.1977 | 0.0069 |
| 662 | P80318 | T-complex protein 1 subunit gamma                                   | Cct3     | -1.1975 | 0.0069 |
| 663 | Q9CQ75 | NADH dehydrogenase [ubiquinone] 1 alpha subcomplex subunit 2        | Ndufa2   | -1.1974 | 0.0069 |
| 664 | Q35963 | Ras-related protein Rab-33B                                         | Rab33b   | -1.1957 | 0.0069 |
| 665 | Q9D338 | 39S ribosomal protein L19 mitochondrial                             | Mrpl19   | -1.1953 | 0.0069 |
| 666 | Q9D111 | Adaptin ear-binding coat-associated protein 2                       | Necap2   | -1.1953 | 0.0069 |

|     |        |                                                                        |          |         |        |
|-----|--------|------------------------------------------------------------------------|----------|---------|--------|
| 667 | Q6Y685 | Transforming acidic coiled-coil-containing protein 1                   | Tacc1    | -1.1953 | 0.0069 |
| 668 | Q3URD3 | Sarcolemmal membrane-associated protein                                | Slmap    | -1.1946 | 0.0069 |
| 669 | Q69ZQ1 | Myogenesis-regulating glycosidase                                      | Myorg    | -1.1946 | 0.0069 |
| 670 | Q8VBX6 | Multiple PDZ domain protein                                            | Mpdz     | -1.1946 | 0.0069 |
| 671 | Q5SYL3 | Protein KIAA0100                                                       | Kiaa0100 | -1.1946 | 0.0069 |
| 672 | P97363 | Serine palmitoyltransferase 2                                          | Sptlc2   | -1.1946 | 0.0069 |
| 673 | P10493 | Nidogen-1                                                              | Nid1     | -1.1930 | 0.0070 |
| 674 | Q99NB9 | Splicing factor 3B subunit 1                                           | Sf3b1    | -1.1915 | 0.0070 |
| 675 | Q9CQ00 | Distal membrane-arm assembly complex protein 1                         | Dmac1    | -1.1903 | 0.0070 |
| 676 | Q91WG7 | Diacylglycerol kinase gamma                                            | Dgkg     | -1.1901 | 0.0070 |
| 677 | Q8K0T0 | Reticulon-1                                                            | Rtn1     | -1.1900 | 0.0070 |
| 678 | Q9ESE1 | Lipopolysaccharide-responsive and beige-like anchor protein            | Lrba     | -1.1882 | 0.0071 |
| 679 | Q9CR68 | Cytochrome b-c1 complex subunit Rieske mitochondrial                   | Uqcrcf1  | -1.1851 | 0.0074 |
| 680 | Q8BG32 | 26S proteasome non-ATPase regulatory subunit 11                        | Psm11    | -1.1828 | 0.0074 |
| 681 | Q9QXT0 | Protein canopy homolog 2                                               | Cnpy2    | -1.1828 | 0.0074 |
| 682 | Q5RKR3 | Immunoglobulin superfamily containing leucine-rich repeat protein 2    | Islr2    | -1.1784 | 0.0075 |
| 683 | P97447 | Four and a half LIM domains protein 1                                  | Fhl1     | -1.1755 | 0.0076 |
| 684 | P00405 | Cytochrome c oxidase subunit 2                                         | Mtco2    | -1.1751 | 0.0076 |
| 685 | P62852 | 40S ribosomal protein S25                                              | Rps25    | -1.1659 | 0.0086 |
| 686 | O08583 | THO complex subunit 4                                                  | Alyref   | -1.1640 | 0.0087 |
| 687 | Q9JJW6 | Aly/REF export factor 2                                                | Alyref2  | -1.1640 | 0.0087 |
| 688 | P28652 | Calcium/calmodulin-dependent protein kinase type II subunit beta       | Camk2b   | -1.1639 | 0.0087 |
| 689 | Q3UHK6 | Teneurin-4                                                             | Tenn4    | -1.1631 | 0.0087 |
| 690 | Q9D6M3 | Mitochondrial glutamate carrier 1                                      | Slc25a22 | -1.1628 | 0.0087 |
| 691 | P70302 | Stromal interaction molecule 1                                         | Stim1    | -1.1627 | 0.0087 |
| 692 | Q3UFF7 | Lysophospholipase-like protein 1                                       | Lyplal1  | -1.1627 | 0.0087 |
| 693 | Q61285 | ATP-binding cassette sub-family D member 2                             | Abcd2    | -1.1627 | 0.0087 |
| 694 | Q61290 | Voltage-dependent R-type calcium channel subunit alpha-1E              | Cacna1e  | -1.1624 | 0.0087 |
| 695 | Q5RJI5 | Serine/threonine-protein kinase BRSK1                                  | Brsk1    | -1.1574 | 0.0089 |
| 696 | Q78IK4 | MIC complex subunit Mic27                                              | Apool    | -1.1574 | 0.0089 |
| 697 | P50171 | (3R)-3-hydroxyacyl-CoA dehydrogenase                                   | Hsd17b8  | -1.1574 | 0.0089 |
| 698 | Q60866 | Phosphotriesterase-related protein                                     | Pter     | -1.1559 | 0.0089 |
| 699 | Q9EPL2 | Calsyntenin-1                                                          | Clstn1   | -1.1545 | 0.0090 |
| 700 | P49722 | Proteasome subunit alpha type-2                                        | Psm2     | -1.1505 | 0.0090 |
| 701 | P08071 | Lactotransferrin                                                       | Ltf      | -1.1505 | 0.0090 |
| 702 | Q9D7X3 | Dual specificity protein phosphatase 3                                 | Dusp3    | -1.1486 | 0.0091 |
| 703 | P14847 | C-reactive protein                                                     | Crp      | -1.1486 | 0.0091 |
| 704 | Q9D9Z5 | DET1- and DDB1-associated protein 1                                    | Dda1     | -1.1486 | 0.0091 |
| 705 | P13808 | Anion exchange protein 2                                               | Slc4a2   | -1.1486 | 0.0091 |
| 706 | Q3UCQ1 | Forkhead box protein K2                                                | Foxk2    | -1.1486 | 0.0091 |
| 707 | P01639 | Ig kappa chain V-V region MOPC 41                                      | Gm5571   | -1.1486 | 0.0091 |
| 708 | Q9JM14 | 5'(3')-deoxyribonucleotidase cytosolic type                            | Nt5c     | -1.1486 | 0.0091 |
| 709 | Q8BZJ7 | DCN1-like protein 2                                                    | Dcun1d2  | -1.1486 | 0.0091 |
| 710 | P01786 | Ig heavy chain V region MOPC 47A                                       |          | -1.1486 | 0.0091 |
| 711 | Q9DCB8 | Iron-sulfur cluster assembly 2 homolog mitochondrial                   | Isca2    | -1.1486 | 0.0091 |
| 712 | Q8BQZ5 | Cleavage and polyadenylation specificity factor subunit 4              | Cpsf4    | -1.1486 | 0.0091 |
| 713 | Q5SW75 | Protein phosphatase Slingshot homolog 2                                | Ssh2     | -1.1486 | 0.0091 |
| 714 | Q9QUQ5 | Short transient receptor potential channel 4                           | Trpc4    | -1.1486 | 0.0091 |
| 715 | P62073 | Mitochondrial import inner membrane translocase subunit Tim10          | Timm10   | -1.1486 | 0.0091 |
| 716 | Q9D115 | Methylmalonyl-CoA epimerase mitochondrial                              | Mcee     | -1.1486 | 0.0091 |
| 717 | P62965 | Cellular retinoic acid-binding protein 1                               | Crabp1   | -1.1486 | 0.0091 |
| 718 | E9PYK3 | Protein mono-ADP-ribosyltransferase PARP4                              | Parp4    | -1.1486 | 0.0091 |
| 719 | A6X919 | Probable C-mannosyltransferase DPY19L1                                 | Dpy19l1  | -1.1486 | 0.0091 |
| 720 | O70200 | Allograft inflammatory factor 1                                        | Aif1     | -1.1486 | 0.0091 |
| 721 | Q9CR64 | Protein kish-A                                                         | Tmem167a | -1.1486 | 0.0091 |
| 722 | P61014 | Cardiac phospholamban                                                  | Pln      | -1.1486 | 0.0091 |
| 723 | Q9CZ83 | 39S ribosomal protein L55 mitochondrial                                | Mrpl55   | -1.1486 | 0.0091 |
| 724 | Q61743 | ATP-sensitive inward rectifier potassium channel 11                    | Kcnj11   | -1.1486 | 0.0091 |
| 725 | Q8VE42 | Ankyrin repeat domain-containing protein 49                            | Ankrd49  | -1.1486 | 0.0091 |
| 726 | Q9EP69 | Phosphatidylinositol-3-phosphatase SAC1                                | Sacm1l   | -1.1480 | 0.0091 |
| 727 | O08992 | Syntenin-1                                                             | Sdcbp    | -1.1470 | 0.0092 |
| 728 | Q9CQA3 | Succinate dehydrogenase [ubiquinone] iron-sulfur subunit mitochondrial | Sdhb     | -1.1428 | 0.0093 |
| 729 | Q8BLN5 | Lanosterol synthase                                                    | Lss      | -1.1425 | 0.0093 |
| 730 | Q3UMF0 | Cordon-bleu protein-like 1                                             | Cobl1    | -1.1412 | 0.0093 |
| 731 | Q80TF3 | Protocadherin-19                                                       | Pcdh19   | -1.1412 | 0.0093 |
| 732 | P97427 | Dihydropyrimidinase-related protein 1                                  | Crmp1    | -1.1410 | 0.0093 |

|     |        |                                                                            |          |         |        |
|-----|--------|----------------------------------------------------------------------------|----------|---------|--------|
| 733 | E9PVB3 | Coiled-coil domain-containing protein 175                                  | Ccdc175  | -1.1409 | 0.0094 |
| 734 | Q8R4U7 | Leucine zipper protein 1                                                   | Luzp1    | -1.1408 | 0.0094 |
| 735 | P11031 | Activated RNA polymerase II transcriptional coactivator p15                | Sub1     | -1.1404 | 0.0094 |
| 736 | Q9D1G5 | Leucine-rich repeat-containing protein 57                                  | Lrrc57   | -1.1403 | 0.0094 |
| 737 | E9Q557 | Desmoplakin                                                                | Dsp      | -1.1393 | 0.0095 |
| 738 | P61027 | Ras-related protein Rab-10                                                 | Rab10    | -1.1377 | 0.0095 |
| 739 | P46638 | Ras-related protein Rab-11B                                                | Rab11b   | -1.1377 | 0.0095 |
| 740 | Q9DB20 | ATP synthase subunit O mitochondrial                                       | Atp5po   | -1.1342 | 0.0095 |
| 741 | B1AXH1 | NHS-like protein 2                                                         | Nhs12    | -1.1301 | 0.0096 |
| 742 | Q9CR62 | Mitochondrial 2-oxoglutarate/malate carrier protein                        | Slc25a11 | -1.1299 | 0.0096 |
| 743 | P70399 | TP53-binding protein 1                                                     | Tp53bp1  | -1.1260 | 0.0097 |
| 744 | P07724 | Albumin                                                                    | Alb      | -1.1236 | 0.0099 |
| 745 | Q9D9V3 | Ethylmalonyl-CoA decarboxylase                                             | Echdc1   | -1.1210 | 0.0101 |
| 746 | P58774 | Tropomyosin beta chain                                                     | Tpm2     | -1.1182 | 0.0102 |
| 747 | Q80XK6 | Autophagy-related protein 2 homolog B                                      | Atg2b    | -1.1173 | 0.0102 |
| 748 | Q6NS52 | Diacylglycerol kinase beta                                                 | Dgkb     | -1.1170 | 0.0102 |
| 749 | Q9WTU6 | Mitogen-activated protein kinase 9                                         | Mapk9    | -1.1157 | 0.0103 |
| 750 | P83887 | Tubulin gamma-1 chain                                                      | Tubg1    | -1.1153 | 0.0103 |
| 751 | Q02384 | Son of sevenless homolog 2                                                 | Sos2     | -1.1153 | 0.0103 |
| 752 | P11835 | Integrin beta-2                                                            | Itgb2    | -1.1151 | 0.0103 |
| 753 | Q505D1 | Serine/threonine-protein phosphatase 6 regulatory ankyrin repeat subunit A | Ankrd28  | -1.1151 | 0.0103 |
| 754 | P70313 | Nitric oxide synthase endothelial                                          | Nos3     | -1.1151 | 0.0103 |
| 755 | Q8BGX2 | Mitochondrial import inner membrane translocase subunit Tim29              | Timm29   | -1.1135 | 0.0103 |
| 756 | Q6WVG3 | BTB/POZ domain-containing protein KCTD12                                   | Kctd12   | -1.1117 | 0.0104 |
| 757 | Q8VBV7 | COP9 signalosome complex subunit 8                                         | Cops8    | -1.1117 | 0.0104 |
| 758 | F6ZDS4 | Nucleoprotein TPR                                                          | Tpr      | -1.1113 | 0.0104 |
| 759 | P98192 | Dihydroxyacetone phosphate acyltransferase                                 | Gnpat    | -1.1089 | 0.0105 |
| 760 | Q8BR90 | UPF0600 protein C5orf51 homolog                                            |          | -1.1089 | 0.0105 |
| 761 | Q9DC53 | Copine-8                                                                   | Cpne8    | -1.1084 | 0.0105 |
| 762 | P61750 | ADP-ribosylation factor 4                                                  | Arf4     | -1.1060 | 0.0106 |
| 763 | A2AN08 | E3 ubiquitin-protein ligase UBR4                                           | Ubr4     | -1.1055 | 0.0106 |
| 764 | P09671 | Superoxide dismutase [Mn] mitochondrial                                    | Sod2     | -1.1052 | 0.0106 |
| 765 | Q91ZR1 | Ras-related protein Rab-4B                                                 | Rab4b    | -1.1021 | 0.0121 |
| 766 | Q8CAQ8 | MIC complex subunit Mic60                                                  | Immt     | -1.1020 | 0.0121 |
| 767 | P61021 | Ras-related protein Rab-5B                                                 | Rab5b    | -1.1020 | 0.0121 |
| 768 | Q8BR92 | Paralemmin-2                                                               | Palm2    | -1.1018 | 0.0122 |
| 769 | Q8BGN8 | Synaptoporin                                                               | Synpr    | -1.1007 | 0.0122 |
| 770 | Q9QYS2 | Metabotropic glutamate receptor 3                                          | Grm3     | -1.1001 | 0.0122 |
| 771 | Q80VP0 | Tectonin beta-propeller repeat-containing protein 1                        | Tecpr1   | -1.0982 | 0.0124 |
| 772 | Q9JIK9 | 28S ribosomal protein S34 mitochondrial                                    | Mrps34   | -1.0975 | 0.0124 |
| 773 | Q78PY7 | Staphylococcal nuclease domain-containing protein 1                        | Snd1     | -1.0968 | 0.0124 |
| 774 | Q6S7F2 | Transcription factor E2F7                                                  | E2f7     | -1.0965 | 0.0125 |
| 775 | Q8R3F5 | Malonyl-CoA-acyl carrier protein transacylase mitochondrial                | Mcat     | -1.0961 | 0.0125 |
| 776 | Q9QYB8 | Beta-adducin                                                               | Add2     | -1.0951 | 0.0126 |
| 777 | Q6VNS1 | NT-3 growth factor receptor                                                | Ntrk3    | -1.0945 | 0.0126 |
| 778 | P62245 | 40S ribosomal protein S15a                                                 | Rps15a   | -1.0945 | 0.0126 |
| 779 | Q9WUU9 | Germinal-center associated nuclear protein                                 | Mcm3ap   | -1.0941 | 0.0126 |
| 780 | Q02013 | Aquaporin-1                                                                | Aqp1     | -1.0941 | 0.0126 |
| 781 | Q6NTA4 | Ras-related GTP-binding protein B                                          | Rragb    | -1.0929 | 0.0126 |
| 782 | Q8BU30 | Isoleucine--tRNA ligase cytoplasmic                                        | Iars1    | -1.0927 | 0.0126 |
| 783 | O08638 | Myosin-11                                                                  | Myh11    | -1.0922 | 0.0127 |
| 784 | Q8CI94 | Glycogen phosphorylase brain form                                          | Pygb     | -1.0910 | 0.0127 |
| 785 | Q9DOM3 | Cytochrome c1 heme protein mitochondrial                                   | Cyc1     | -1.0891 | 0.0127 |
| 786 | P22682 | E3 ubiquitin-protein ligase CBL                                            | Cbl      | -1.0887 | 0.0127 |
| 787 | Q9ERI6 | Retinol dehydrogenase 14                                                   | Rdh14    | -1.0883 | 0.0127 |
| 788 | Q9CQ19 | Myosin regulatory light polypeptide 9                                      | Myl9     | -1.0883 | 0.0127 |
| 789 | Q6P069 | Sorcin                                                                     | Sri      | -1.0879 | 0.0128 |
| 790 | Q6PHN9 | Ras-related protein Rab-35                                                 | Rab35    | -1.0866 | 0.0128 |
| 791 | Q68ED7 | CREB-regulated transcription coactivator 1                                 | Crtc1    | -1.0853 | 0.0129 |
| 792 | G5E870 | E3 ubiquitin-protein ligase TRIP12                                         | Trip12   | -1.0853 | 0.0129 |
| 793 | P54797 | Transport and Golgi organization 2 homolog                                 | Tango2   | -1.0853 | 0.0129 |
| 794 | Q99MU3 | Double-stranded RNA-specific adenosine deaminase                           | Adar     | -1.0847 | 0.0129 |
| 795 | P62484 | Abl interactor 2                                                           | Abi2     | -1.0818 | 0.0130 |
| 796 | Q9QZF2 | Glypican-1                                                                 | Gpc1     | -1.0810 | 0.0130 |
| 797 | Q9CQE8 | RNA transcription translation and transport factor protein                 | RTRAF    | -1.0794 | 0.0130 |
| 798 | Q9CQJ8 | NADH dehydrogenase [ubiquinone] 1 beta subcomplex subunit 9                | Ndufb9   | -1.0769 | 0.0131 |
| 799 | Q9WVQ5 | Methylthioribulose-1-phosphate dehydratase                                 | Apip     | -1.0755 | 0.0132 |

|     |         |                                                                          |         |         |        |
|-----|---------|--------------------------------------------------------------------------|---------|---------|--------|
| 800 | Q8K2I4  | Beta-mannosidase                                                         | Manba   | -1.0755 | 0.0132 |
| 801 | Q61599  | Rho GDP-dissociation inhibitor 2                                         | Arhgdib | -1.0755 | 0.0132 |
| 802 | Q3U1F9  | Phosphoprotein associated with glycosphingolipid-enriched microdomains 1 | Pag1    | -1.0755 | 0.0132 |
| 803 | Q04519  | Sphingomyelin phosphodiesterase                                          | Smpd1   | -1.0755 | 0.0132 |
| 804 | O88745  | Scrapie-responsive protein 1                                             | Scrg1   | -1.0755 | 0.0132 |
| 805 | Q9JJI8  | 60S ribosomal protein L38                                                | Rpl38   | -1.0755 | 0.0132 |
| 806 | P84089  | Enhancer of rudimentary homolog                                          | Erh     | -1.0755 | 0.0132 |
| 807 | Q9EPV8  | Ubiquitin-like protein 5                                                 | Ubl5    | -1.0755 | 0.0132 |
| 808 | P01887  | Beta-2-microglobulin                                                     | B2m     | -1.0755 | 0.0132 |
| 809 | O70194  | Eukaryotic translation initiation factor 3 subunit D                     | Eif3d   | -1.0739 | 0.0132 |
| 810 | Q9JIG8  | PRA1 family protein 2                                                    | Praf2   | -1.0739 | 0.0132 |
| 811 | P34022  | Ran-specific GTPase-activating protein                                   | Ranbp1  | -1.0731 | 0.0132 |
| 812 | Q9QYE9  | Pleckstrin homology domain-containing family B member 1                  | Plekhh1 | -1.0707 | 0.0133 |
| 813 | O54950  | 5'-AMP-activated protein kinase subunit gamma-1                          | Prkag1  | -1.0680 | 0.0134 |
| 814 | Q8BRF7  | Sec1 family domain-containing protein 1                                  | Scfd1   | -1.0668 | 0.0135 |
| 815 | Q9DBT5  | AMP deaminase 2                                                          | Ampd2   | -1.0657 | 0.0135 |
| 816 | Q8BSL7  | ADP-ribosylation factor 2                                                | Arf2    | -1.0600 | 0.0138 |
| 817 | P14069  | Protein S100-A6                                                          | S100a6  | -1.0580 | 0.0138 |
| 818 | Q9QYCO  | Alpha-adducin                                                            | Add1    | -1.0572 | 0.0138 |
| 819 | Q9QZ23  | NFU1 iron-sulfur cluster scaffold homolog mitochondrial                  | Nfu1    | -1.0557 | 0.0139 |
| 820 | P03930  | ATP synthase protein 8                                                   | Mtstp8  | -1.0557 | 0.0139 |
| 821 | P63168  | Dynein light chain 1 cytoplasmic                                         | Dynll1  | -1.0556 | 0.0139 |
| 822 | P25785  | Metalloproteinase inhibitor 2                                            | Timp2   | -1.0556 | 0.0139 |
| 823 | Q8VEB6  | Zinc phosphodiesterase ELAC protein 1                                    | Elac1   | -1.0556 | 0.0139 |
| 824 | P53808  | Phosphatidylcholine transfer protein                                     | Pctp    | -1.0556 | 0.0139 |
| 825 | Q91WN1  | DnaJ homolog subfamily C member 9                                        | Dnajc9  | -1.0556 | 0.0139 |
| 826 | Q9CQH7  | Transcription factor BTF3 homolog 4                                      | Btf3l4  | -1.0556 | 0.0139 |
| 827 | Q3V4B5  | COMM domain-containing protein 6                                         | Commd6  | -1.0556 | 0.0139 |
| 828 | Q99LY9  | NADH dehydrogenase [ubiquinone] iron-sulfur protein 5                    | Ndufs5  | -1.0556 | 0.0139 |
| 829 | Q9D7B7  | Probable glutathione peroxidase 8                                        | Gpx8    | -1.0556 | 0.0139 |
| 830 | P58064  | 28S ribosomal protein S6 mitochondrial                                   | Mrps6   | -1.0556 | 0.0139 |
| 831 | Q8BTE5  | Protein CEBPZ                                                            | Cebpzos | -1.0556 | 0.0139 |
| 832 | Q5DUJ37 | Zinc finger FYVE domain-containing protein 26                            | Zfyve26 | -1.0556 | 0.0139 |
| 833 | Q7TPG7  | Chemokine-like protein Tafa-2                                            | Tafa2   | -1.0556 | 0.0139 |
| 834 | Q8K2A1  | PTB domain-containing engulfment adapter protein 1                       | Gulp1   | -1.0556 | 0.0139 |
| 835 | Q0VBK2  | Keratin type II cytoskeletal 80                                          | Krt80   | -1.0556 | 0.0139 |
| 836 | P56873  | Protein ZNRD2                                                            | Znrd2   | -1.0556 | 0.0139 |
| 837 | P11881  | Inositol 1 4 5-trisphosphate receptor type 1                             | Itpr1   | -1.0551 | 0.0139 |
| 838 | P97449  | Aminopeptidase N                                                         | Anpep   | -1.0549 | 0.0140 |
| 839 | Q9WTU3  | Sodium channel protein type 8 subunit alpha                              | Scn8a   | -1.0546 | 0.0140 |
| 840 | P97742  | Carnitine O-palmitoyltransferase 1 liver isoform                         | Cpt1a   | -1.0546 | 0.0140 |
| 841 | Q8CIZ8  | von Willebrand factor                                                    | Vwf     | -1.0546 | 0.0140 |
| 842 | Q60932  | Voltage-dependent anion-selective channel protein 1                      | Vdac1   | -1.0546 | 0.0140 |
| 843 | P32020  | Sterol carrier protein 2                                                 | Scp2    | -1.0524 | 0.0140 |
| 844 | Q91VR2  | ATP synthase subunit gamma mitochondrial                                 | Atp5f1c | -1.0523 | 0.0141 |
| 845 | P00493  | Hypoxanthine-guanine phosphoribosyltransferase                           | Hprt1   | -1.0511 | 0.0141 |
| 846 | Q9Z218  | Dipeptidyl aminopeptidase-like protein 6                                 | Dpp6    | -1.0505 | 0.0142 |
| 847 | Q3UHB1  | 5'-nucleotidase domain-containing protein 3                              | Nt5dc3  | -1.0484 | 0.0144 |
| 848 | Q8BXR9  | Oxysterol-binding protein-related protein 6                              | Osbpl6  | -1.0478 | 0.0145 |
| 849 | Q9JK23  | Proteasome assembly chaperone 1                                          | Psmg1   | -1.0478 | 0.0145 |
| 850 | Q9QZ06  | Toll-interacting protein                                                 | Tollip  | -1.0478 | 0.0145 |
| 851 | P83093  | Stromal interaction molecule 2                                           | Stim2   | -1.0477 | 0.0145 |
| 852 | Q6PER3  | Microtubule-associated protein RP/EB family member 3                     | Mapre3  | -1.0471 | 0.0145 |
| 853 | Q7TQF7  | Amphiphysin                                                              | Amph    | -1.0467 | 0.0146 |
| 854 | P30999  | Catenin delta-1                                                          | Ctnnd1  | -1.0446 | 0.0146 |
| 855 | Q810M5  | Palmitoyltransferase ZDHHC19                                             | Zdhhc19 | -1.0441 | 0.0146 |
| 856 | Q3TKT4  | Transcription activator BRG1                                             | Smarca4 | -1.0439 | 0.0147 |
| 857 | Q8K0C1  | Importin-13                                                              | Ipo13   | -1.0425 | 0.0147 |
| 858 | Q8BGR2  | Volume-regulated anion channel subunit LRRC8D                            | Lrrc8d  | -1.0425 | 0.0147 |
| 859 | Q8CHQ0  | F-box only protein 4                                                     | Fbxo4   | -1.0425 | 0.0147 |
| 860 | Q80VV2  | Nuclear-interacting partner of ALK                                       | Zc3hc1  | -1.0421 | 0.0147 |
| 861 | Q64378  | Peptidyl-prolyl cis-trans isomerase FKBP5                                | Fkbp5   | -1.0421 | 0.0147 |
| 862 | O35445  | E3 ubiquitin-protein ligase RNF5                                         | Rnf5    | -1.0421 | 0.0147 |
| 863 | Q91YY4  | ATP synthase mitochondrial F1 complex assembly factor 2                  | Atpaf2  | -1.0421 | 0.0147 |
| 864 | Q8BWH0  | Putative sodium-coupled neutral amino acid transporter 7                 | Slc38a7 | -1.0421 | 0.0147 |
| 865 | Q3UUVL4 | Vacuolar protein sorting-associated protein 51 homolog                   | Vps51   | -1.0420 | 0.0147 |
| 866 | P17225  | Polypyrimidine tract-binding protein 1                                   | Ptbp1   | -1.0408 | 0.0149 |

|     |        |                                                                  |          |         |        |
|-----|--------|------------------------------------------------------------------|----------|---------|--------|
| 867 | Q9QXY6 | EH domain-containing protein 3                                   | Ehd3     | -1.0372 | 0.0150 |
| 868 | Q8BYM5 | Neuroigin-3                                                      | Nlgn3    | -1.0365 | 0.0151 |
| 869 | O70435 | Proteasome subunit alpha type-3                                  | Psm3     | -1.0333 | 0.0152 |
| 870 | Q61207 | Prosaposin                                                       | Psap     | -1.0312 | 0.0152 |
| 871 | P50518 | V-type proton ATPase subunit E 1                                 | Atp6v1e1 | -1.0310 | 0.0152 |
| 872 | Q9CR51 | V-type proton ATPase subunit G 1                                 | Atp6v1g1 | -1.0310 | 0.0152 |
| 873 | Q99K46 | Ubiquitin carboxyl-terminal hydrolase 11                         | Usp11    | -1.0305 | 0.0152 |
| 874 | P27048 | Small nuclear ribonucleoprotein-associated protein B             | Snrpb    | -1.0305 | 0.0152 |
| 875 | P63163 | Small nuclear ribonucleoprotein-associated protein N             | Snrpn    | -1.0305 | 0.0152 |
| 876 | Q61765 | Keratin type I cuticular Ha1                                     | Krt31    | -1.0305 | 0.0152 |
| 877 | Q3UV17 | Keratin type II cytoskeletal 2 oral                              | Krt76    | -1.0303 | 0.0152 |
| 878 | P68404 | Protein kinase C beta type                                       | Prkcb    | -1.0276 | 0.0153 |
| 879 | P59281 | Rho GTPase-activating protein 39                                 | Arhgap39 | -1.0258 | 0.0156 |
| 880 | P41105 | 60S ribosomal protein L28                                        | Rpl28    | -1.0257 | 0.0156 |
| 881 | P23819 | Glutamate receptor 2                                             | Gria2    | -1.0253 | 0.0156 |
| 882 | Q9CRC9 | Glucosamine-6-phosphate isomerase 2                              | Gnpda2   | -1.0252 | 0.0156 |
| 883 | Q9CPU0 | Lactoylglutathione lyase                                         | Glo1     | -1.0246 | 0.0156 |
| 884 | P56135 | ATP synthase subunit f mitochondrial                             | Atp5mf   | -1.0244 | 0.0156 |
| 885 | P62900 | 60S ribosomal protein L31                                        | Rpl31    | -1.0238 | 0.0156 |
| 886 | Q61941 | NAD(P) transhydrogenase mitochondrial                            | Nnt      | -1.0230 | 0.0158 |
| 887 | Q64332 | Synapsin-2                                                       | Syn2     | -1.0215 | 0.0159 |
| 888 | Q3UU96 | Serine/threonine-protein kinase MRCK alpha                       | Cdc42bpa | -1.0212 | 0.0159 |
| 889 | Q61753 | D-3-phosphoglycerate dehydrogenase                               | Phgdh    | -1.0204 | 0.0159 |
| 890 | Q80YD1 | ATP-dependent RNA helicase SUPV3L1 mitochondrial                 | Supv3l1  | -1.0195 | 0.0160 |
| 891 | P62137 | Serine/threonine-protein phosphatase PP1-alpha catalytic subunit | Ppp1ca   | -1.0194 | 0.0160 |
| 892 | P60487 | Chronophin                                                       | Pdxp     | -1.0187 | 0.0160 |
| 893 | Q9R112 | Sulfide:quinone oxidoreductase mitochondrial                     | Sqor     | -1.0161 | 0.0163 |
| 894 | Q7TPS5 | C2 domain-containing protein 5                                   | C2cd5    | -1.0161 | 0.0163 |
| 895 | Q8CHG7 | Rap guanine nucleotide exchange factor 2                         | Rapgef2  | -1.0154 | 0.0163 |
| 896 | P47963 | 60S ribosomal protein L13                                        | Rpl13    | -1.0151 | 0.0163 |
| 897 | Q6PFD5 | Disks large-associated protein 3                                 | Dlgap3   | -1.0132 | 0.0164 |
| 898 | Q80VL1 | Tudor and KH domain-containing protein                           | Tdrkh    | -1.0123 | 0.0165 |
| 899 | P08032 | Spectrin alpha chain erythrocytic 1                              | Spta1    | -1.0118 | 0.0165 |
| 900 | P50446 | Keratin type II cytoskeletal 6A                                  | Krt6a    | -1.0106 | 0.0165 |
| 901 | Q9CWI9 | Bifunctional purine biosynthesis protein ATIC                    | Atic     | -1.0105 | 0.0165 |
| 902 | Q80TB8 | Synaptic vesicle membrane protein VAT-1 homolog-like             | Vat1l    | -1.0085 | 0.0166 |
| 903 | O55100 | Synaptogyrin-1                                                   | Syng1    | -1.0077 | 0.0166 |
| 904 | O70310 | Glycylpeptide N-tetradecanoyltransferase 1                       | Nmt1     | -1.0050 | 0.0168 |
| 905 | P61028 | Ras-related protein Rab-8B                                       | Rab8b    | -1.0034 | 0.0169 |
| 906 | Q9QXK3 | Coatamer subunit gamma-2                                         | Copg2    | -1.0034 | 0.0169 |
| 907 | P70182 | Phosphatidylinositol 4-phosphate 5-kinase type-1 alpha           | Pip5k1a  | -1.0030 | 0.0170 |
| 908 | Q924M7 | Mannose-6-phosphate isomerase                                    | Mpi      | -1.0026 | 0.0170 |
| 909 | Q8BFT9 | Synaptic vesicle 2-related protein                               | Svop     | -1.0025 | 0.0170 |
| 910 | Q91W50 | Cold shock domain-containing protein E1                          | Csde1    | -1.0004 | 0.0171 |
| 911 | P62878 | E3 ubiquitin-protein ligase RBX1                                 | Rbx1     | -0.9985 | 0.0171 |
| 912 | D3Z7P3 | Glutaminase kidney isoform mitochondrial                         | Gls      | -0.9985 | 0.0171 |
| 913 | Q9R1Q8 | Transgelin-3                                                     | Tagln3   | -0.9978 | 0.0171 |
| 914 | Q99LI8 | Hepatocyte growth factor-regulated tyrosine kinase substrate     | Hgs      | -0.9971 | 0.0171 |
| 915 | Q9D0R2 | Threonine--tRNA ligase 1 cytoplasmic                             | Tars1    | -0.9971 | 0.0171 |
| 916 | Q9DCU6 | 39S ribosomal protein L4 mitochondrial                           | Mrpl4    | -0.9964 | 0.0172 |
| 917 | P84086 | Complexin-2                                                      | Cplx2    | -0.9964 | 0.0172 |
| 918 | Q45VK7 | Cytoplasmic dynein 2 heavy chain 1                               | Dync2h1  | -0.9964 | 0.0172 |
| 919 | Q61292 | Laminin subunit beta-2                                           | Lamb2    | -0.9959 | 0.0172 |
| 920 | Q8C7R4 | Ubiquitin-like modifier-activating enzyme 6                      | Uba6     | -0.9958 | 0.0172 |
| 921 | Q6NVF0 | Inositol polyphosphate 5-phosphatase OCRL                        | Ocrl     | -0.9956 | 0.0172 |
| 922 | Q5H8C4 | Vacuolar protein sorting-associated protein 13A                  | Vps13a   | -0.9943 | 0.0173 |
| 923 | Q64727 | Vinculin                                                         | Vcl      | -0.9896 | 0.0175 |
| 924 | Q9CZM2 | 60S ribosomal protein L15                                        | Rpl15    | -0.9893 | 0.0175 |
| 925 | Q8BMS1 | Trifunctional enzyme subunit alpha mitochondrial                 | Hadha    | -0.9882 | 0.0176 |
| 926 | Q9D0R8 | Protein LSM12 homolog                                            | Lsm12    | -0.9881 | 0.0176 |
| 927 | Q80U30 | Protein CLEC16A                                                  | Clec16a  | -0.9881 | 0.0176 |
| 928 | Q8BVI5 | Syntaxin-16                                                      | Stx16    | -0.9868 | 0.0178 |
| 929 | Q8BLJ3 | PI-PLC X domain-containing protein 3                             | Plcx3    | -0.9868 | 0.0178 |
| 930 | Q60674 | Nuclear receptor subfamily 1 group D member 2                    | Nr1d2    | -0.9868 | 0.0178 |
| 931 | Q9CQF0 | 39S ribosomal protein L11 mitochondrial                          | Mrpl11   | -0.9860 | 0.0178 |
| 932 | Q8VEK0 | Cell cycle control protein 50A                                   | Tmem30a  | -0.9847 | 0.0179 |
| 933 | Q8BHE3 | Caytaxin                                                         | Atcay    | -0.9847 | 0.0179 |

|     |        |                                                                                                         |           |         |        |
|-----|--------|---------------------------------------------------------------------------------------------------------|-----------|---------|--------|
| 934 | Q91YN0 | Protein C12orf4 homolog                                                                                 | D6Wsu163e | -0.9845 | 0.0179 |
| 935 | Q9CRB9 | MIC complex subunit Mic19                                                                               | Chchd3    | -0.9802 | 0.0180 |
| 936 | Q8VDM4 | 26S proteasome non-ATPase regulatory subunit 2                                                          | Psmd2     | -0.9801 | 0.0181 |
| 937 | Q9WUR9 | Adenylate kinase 4 mitochondrial                                                                        | Ak4       | -0.9783 | 0.0181 |
| 938 | Q9DBR1 | 5'-3' exoribonuclease 2                                                                                 | Xrn2      | -0.9760 | 0.0182 |
| 939 | Q91WG5 | 5'-AMP-activated protein kinase subunit gamma-2                                                         | Prkag2    | -0.9757 | 0.0182 |
| 940 | Q8BMF4 | Dihydrolipoyllysine-residue acetyltransferase component of pyruvate dehydrogenase complex mitochondrial | Dlat      | -0.9741 | 0.0183 |
| 941 | P60603 | Reactive oxygen species modulator 1                                                                     | Romo1     | -0.9728 | 0.0198 |
| 942 | O08553 | Dihydropyrimidinase-related protein 2                                                                   | Dpysl2    | -0.9721 | 0.0198 |
| 943 | Q63836 | Selenium-binding protein 2                                                                              | Selenbp2  | -0.9710 | 0.0200 |
| 944 | P32883 | GTPase KRas                                                                                             | Kras      | -0.9710 | 0.0200 |
| 945 | Q9EPA7 | Nicotinamide/nicotinic acid mononucleotide adenyltransferase 1                                          | Nmnat1    | -0.9709 | 0.0200 |
| 946 | Q8BFR4 | N-acetylglucosamine-6-sulfatase                                                                         | Gns       | -0.9709 | 0.0200 |
| 947 | Q8VDD5 | Myosin-9                                                                                                | Myh9      | -0.9701 | 0.0200 |
| 948 | P14602 | Heat shock protein beta-1                                                                               | Hspb1     | -0.9661 | 0.0206 |
| 949 | B1AXV0 | DOMON domain-containing protein FRRS1L                                                                  | Frrs1l    | -0.9655 | 0.0206 |
| 950 | Q8R0H9 | ADP-ribosylation factor-binding protein GGA1                                                            | Gga1      | -0.9651 | 0.0206 |
| 951 | Q9CQH3 | NADH dehydrogenase [ubiquinone] 1 beta subcomplex subunit 5 mitochondrial                               | Ndufb5    | -0.9651 | 0.0206 |
| 952 | Q8R4F1 | Netrin-G2                                                                                               | Ntng2     | -0.9648 | 0.0207 |
| 953 | Q8VEM8 | Phosphate carrier protein mitochondrial                                                                 | Slc25a3   | -0.9610 | 0.0211 |
| 954 | Q8BKT7 | THO complex subunit 5 homolog                                                                           | Thoc5     | -0.9600 | 0.0212 |
| 955 | Q9CVB6 | Actin-related protein 2/3 complex subunit 2                                                             | Arpc2     | -0.9568 | 0.0213 |
| 956 | Q91V14 | Solute carrier family 12 member 5                                                                       | Slc12a5   | -0.9549 | 0.0214 |
| 957 | Q6PDN3 | Myosin light chain kinase smooth muscle                                                                 | Mylk      | -0.9537 | 0.0216 |
| 958 | Q8CI51 | PDZ and LIM domain protein 5                                                                            | Pdlim5    | -0.9535 | 0.0216 |
| 959 | Q8VI36 | Paxillin                                                                                                | Pxn       | -0.9524 | 0.0216 |
| 960 | P11679 | Keratin type II cytoskeletal 8                                                                          | Krt8      | -0.9507 | 0.0219 |
| 961 | P17742 | Peptidyl-prolyl cis-trans isomerase A                                                                   | Ppia      | -0.9506 | 0.0219 |
| 962 | Q3UFY8 | tRNA methyltransferase 10 homolog C                                                                     | Trmt10c   | -0.9501 | 0.0219 |
| 963 | Q62108 | Disks large homolog 4                                                                                   | Dlg4      | -0.9497 | 0.0223 |
| 964 | O70566 | Protein diaphanous homolog 2                                                                            | Diaph2    | -0.9487 | 0.0224 |
| 965 | Q0VGY8 | Protein TANC1                                                                                           | Tanc1     | -0.9476 | 0.0225 |
| 966 | P57784 | U2 small nuclear ribonucleoprotein A'                                                                   | Snrpa1    | -0.9473 | 0.0225 |
| 967 | Q9WV54 | Acid ceramidase                                                                                         | Asah1     | -0.9471 | 0.0225 |
| 968 | O70325 | Phospholipid hydroperoxide glutathione peroxidase                                                       | Gpx4      | -0.9470 | 0.0225 |
| 969 | Q3UVX5 | Metabotropic glutamate receptor 5                                                                       | Grm5      | -0.9461 | 0.0225 |
| 970 | Q9WV91 | Prostaglandin F2 receptor negative regulator                                                            | Ptgfrn    | -0.9454 | 0.0226 |
| 971 | Q3UNZ8 | Quinone oxidoreductase-like protein 2                                                                   | Cryz12    | -0.9454 | 0.0226 |
| 972 | Q91XY4 | Protocadherin gamma-A4                                                                                  | Pcdhga4   | -0.9454 | 0.0226 |
| 973 | Q9ET26 | E3 ubiquitin-protein ligase RNF114                                                                      | Rnf114    | -0.9431 | 0.0226 |
| 974 | P68037 | Ubiquitin-conjugating enzyme E2 L3                                                                      | Ube2l3    | -0.9423 | 0.0227 |
| 975 | P61164 | Alpha-centractin                                                                                        | Actr1a    | -0.9405 | 0.0228 |
| 976 | P47199 | Quinone oxidoreductase                                                                                  | Cryz      | -0.9394 | 0.0229 |
| 977 | Q80Y81 | Zinc phosphodiesterase ELAC protein 2                                                                   | Elac2     | -0.9352 | 0.0233 |
| 978 | P07744 | Keratin type II cytoskeletal 4                                                                          | Krt4      | -0.9351 | 0.0233 |
| 979 | Q8VI75 | Importin-4                                                                                              | Ipo4      | -0.9345 | 0.0233 |
| 980 | Q8C754 | Vacuolar protein sorting-associated protein 52 homolog                                                  | Vps52     | -0.9342 | 0.0233 |
| 981 | P62761 | Visinin-like protein 1                                                                                  | Vsnl1     | -0.9314 | 0.0235 |
| 982 | Q9JKF7 | 39S ribosomal protein L39 mitochondrial                                                                 | Mrpl39    | -0.9306 | 0.0236 |
| 983 | Q9QUP5 | Hyaluronan and proteoglycan link protein 1                                                              | Hapln1    | -0.9280 | 0.0238 |
| 984 | Q5DTN8 | Janus kinase and microtubule-interacting protein 3                                                      | Jakmip3   | -0.9276 | 0.0238 |
| 985 | Q9DBC7 | cAMP-dependent protein kinase type I-alpha regulatory subunit                                           | Prkar1a   | -0.9266 | 0.0239 |
| 986 | Q8K212 | Phosphofurin acidic cluster sorting protein 1                                                           | Pacs1     | -0.9264 | 0.0239 |
| 987 | Q6P2B1 | Transportin-3                                                                                           | Tnpo3     | -0.9231 | 0.0242 |
| 988 | P63087 | Serine/threonine-protein phosphatase PP1-gamma catalytic subunit                                        | Ppp1cc    | -0.9227 | 0.0242 |
| 989 | Q8VBZ3 | Cleft lip and palate transmembrane protein 1 homolog                                                    | Clptm1    | -0.9226 | 0.0242 |
| 990 | Q35639 | Annexin A3                                                                                              | Anxa3     | -0.9226 | 0.0242 |
| 991 | Q9JJ28 | Protein flightless-1 homolog                                                                            | Flii      | -0.9201 | 0.0244 |
| 992 | Q61301 | Catenin alpha-2                                                                                         | Ctnna2    | -0.9199 | 0.0244 |
| 993 | Q99L13 | 3-hydroxyisobutyrate dehydrogenase mitochondrial                                                        | Hibadh    | -0.9183 | 0.0245 |
| 994 | Q68FM6 | Protein phosphatase 1 regulatory subunit 29                                                             | Elfn2     | -0.9162 | 0.0246 |
| 995 | Q7TT50 | Serine/threonine-protein kinase MRCK beta                                                               | Cdc42bbp  | -0.9155 | 0.0247 |
| 996 | P29533 | Vascular cell adhesion protein 1                                                                        | Vcam1     | -0.9150 | 0.0247 |
| 997 | Q9JKC8 | AP-3 complex subunit mu-1                                                                               | Ap3m1     | -0.9150 | 0.0247 |



|      |        |                                                                             |          |         |        |
|------|--------|-----------------------------------------------------------------------------|----------|---------|--------|
| 998  | Q8VDK1 | Deaminated glutathione amidase                                              | Nit1     | -0.9140 | 0.0247 |
| 999  | Q80Y24 | Prickle-like protein 2                                                      | Prickle2 | -0.9115 | 0.0248 |
| 1000 | Q78J03 | Methionine-R-sulfoxide reductase B2 mitochondrial                           | MsrB2    | -0.9115 | 0.0248 |
| 1001 | P61804 | Dolichyl-diphosphooligosaccharide--protein glycosyltransferase subunit DAD1 | Dad1     | -0.9115 | 0.0248 |
| 1002 | P08030 | Adenine phosphoribosyltransferase                                           | Aprt     | -0.9115 | 0.0248 |
| 1003 | Q9D7X1 | BTB/POZ domain-containing protein KCTD4                                     | Kctd4    | -0.9115 | 0.0248 |
| 1004 | Q62422 | Osteoclast-stimulating factor 1                                             | Ostf1    | -0.9115 | 0.0248 |
| 1005 | P97298 | Pigment epithelium-derived factor                                           | Serpinf1 | -0.9115 | 0.0248 |
| 1006 | Q63810 | Calcineurin subunit B type 1                                                | Ppp3r1   | -0.9115 | 0.0248 |
| 1007 | O35955 | Proteasome subunit beta type-10                                             | PsmB10   | -0.9115 | 0.0248 |
| 1008 | Q99M11 | ELKS/Rab6-interacting/CAST family member 1                                  | Erc1     | -0.9112 | 0.0249 |
| 1009 | P46664 | Adenylosuccinate synthetase isozyme 2                                       | Adss2    | -0.9112 | 0.0249 |
| 1010 | P47753 | F-actin-capping protein subunit alpha-1                                     | Capza1   | -0.9108 | 0.0249 |
| 1011 | P99029 | Peroxiredoxin-5 mitochondrial                                               | Prdx5    | -0.9084 | 0.0251 |
| 1012 | B9EKR1 | Receptor-type tyrosine-protein phosphatase zeta                             | Ptprz1   | -0.9069 | 0.0251 |
| 1013 | P0C7L0 | WAS/WASL-interacting protein family member 3                                | Wipf3    | -0.9054 | 0.0252 |
| 1014 | P06728 | Apolipoprotein A-IV                                                         | Apoa4    | -0.9047 | 0.0253 |
| 1015 | Q9CYW4 | Haloacid dehalogenase-like hydrolase domain-containing protein 3            | Hdhd3    | -0.9047 | 0.0253 |
| 1016 | Q9R013 | Cathepsin F                                                                 | Ctsf     | -0.9047 | 0.0253 |
| 1017 | Q9JKK7 | Tropomodulin-2                                                              | Tmod2    | -0.9014 | 0.0255 |
| 1018 | O09061 | Proteasome subunit beta type-1                                              | PsmB1    | -0.8987 | 0.0259 |
| 1019 | Q9CPR4 | 60S ribosomal protein L17                                                   | Rpl17    | -0.8987 | 0.0259 |
| 1020 | Q9Z2W9 | Glutamate receptor 3                                                        | Gria3    | -0.8981 | 0.0259 |
| 1021 | Q80X60 | EF-hand calcium-binding domain-containing protein 3                         | Efcab3   | -0.8944 | 0.0261 |
| 1022 | Q8K4Z5 | Splicing factor 3A subunit 1                                                | Sf3a1    | -0.8940 | 0.0261 |
| 1023 | P35550 | rRNA 2'-O-methyltransferase fibrillarin                                     | Fbl      | -0.8933 | 0.0262 |
| 1024 | P15864 | Histone H1.2                                                                | H1-2     | -0.8932 | 0.0262 |
| 1025 | Q6PGH1 | Protein BUD31 homolog                                                       | Bud31    | -0.8907 | 0.0263 |
| 1026 | Q91YP2 | Neurolysin mitochondrial                                                    | Nln      | -0.8855 | 0.0271 |
| 1027 | Q8C8N2 | Protein SCAI                                                                | Scai     | -0.8844 | 0.0272 |
| 1028 | P52332 | Tyrosine-protein kinase JAK1                                                | Jak1     | -0.8843 | 0.0272 |
| 1029 | Q60967 | Bifunctional 3'-phosphoadenosine 5'-phosphosulfate synthase 1               | Papss1   | -0.8843 | 0.0272 |
| 1030 | Q99M87 | DnaJ homolog subfamily A member 3 mitochondrial                             | DnajA3   | -0.8843 | 0.0272 |
| 1031 | O09131 | Glutathione S-transferase omega-1                                           | Gsto1    | -0.8843 | 0.0272 |
| 1032 | Q8CBW3 | Abl interactor 1                                                            | Abi1     | -0.8829 | 0.0273 |
| 1033 | Q810U4 | Neuronal cell adhesion molecule                                             | Nrcam    | -0.8810 | 0.0273 |
| 1034 | Q69ZU6 | Thrombospondin type-1 domain-containing protein 7A                          | Thsd7a   | -0.8798 | 0.0274 |
| 1035 | Q8VE80 | THO complex subunit 3                                                       | Thoc3    | -0.8791 | 0.0274 |
| 1036 | Q6PDJ6 | F-box only protein 42                                                       | Fbxo42   | -0.8791 | 0.0274 |
| 1037 | Q9CXY1 | Endosomal/lysosomal potassium channel TMEM175                               | Tmem175  | -0.8791 | 0.0274 |
| 1038 | Q6ZPS6 | Ankyrin repeat and IBR domain-containing protein 1                          | Ankib1   | -0.8791 | 0.0274 |
| 1039 | P70248 | Unconventional myosin-Ilf                                                   | Myo1f    | -0.8791 | 0.0274 |
| 1040 | P49222 | Protein 4.2                                                                 | Epb42    | -0.8791 | 0.0274 |
| 1041 | Q99MD6 | Thioredoxin reductase 3                                                     | Txnrd3   | -0.8791 | 0.0274 |
| 1042 | Q9Z2D8 | Methyl-CpG-binding domain protein 3                                         | Mbd3     | -0.8791 | 0.0274 |
| 1043 | Q3ZT31 | Sorting nexin-25                                                            | Snx25    | -0.8791 | 0.0274 |
| 1044 | Q80XS6 | Protein Smaug homolog 2                                                     | Samd4b   | -0.8791 | 0.0274 |
| 1045 | Q8CHE4 | PH domain leucine-rich repeat-containing protein phosphatase 1              | Phlpp1   | -0.8791 | 0.0274 |
| 1046 | Q8C172 | Ceramide synthase 6                                                         | Cers6    | -0.8791 | 0.0274 |
| 1047 | O88834 | SH2 domain-containing adapter protein D                                     | Shd      | -0.8791 | 0.0274 |
| 1048 | O88522 | NF-kappa-B essential modulator                                              | Ikbkg    | -0.8791 | 0.0274 |
| 1049 | Q68FF0 | Uncharacterized protein KIAA1841                                            | Kiaa1841 | -0.8791 | 0.0274 |
| 1050 | Q9QZL6 | Ubiquitin carboxyl-terminal hydrolase 21                                    | Usp21    | -0.8791 | 0.0274 |
| 1051 | Q91ZA3 | Propionyl-CoA carboxylase alpha chain mitochondrial                         | Pcca     | -0.8783 | 0.0274 |
| 1052 | Q8BKG3 | Inactive tyrosine-protein kinase 7                                          | Ptk7     | -0.8775 | 0.0275 |
| 1053 | Q91VH2 | Sorting nexin-9                                                             | Snx9     | -0.8775 | 0.0275 |
| 1054 | Q8K2P7 | Sodium-coupled neutral amino acid transporter 1                             | Slc38a1  | -0.8775 | 0.0275 |
| 1055 | Q32M21 | Gasdermin-A2                                                                | Gsdma2   | -0.8775 | 0.0275 |
| 1056 | Q9WUT3 | Ribosomal protein S6 kinase alpha-2                                         | Rps6ka2  | -0.8764 | 0.0275 |
| 1057 | P58044 | Isopentenyl-diphosphate Delta-isomerase 1                                   | Idi1     | -0.8755 | 0.0277 |
| 1058 | Q8K353 | Cysteine-rich and transmembrane domain-containing protein 1                 | Cystm1   | -0.8755 | 0.0277 |
| 1059 | Q5M8N4 | Epimerase family protein SDR39U1                                            | Sdr39u1  | -0.8755 | 0.0277 |
| 1060 | Q9D5V5 | Cullin-5                                                                    | Cul5     | -0.8751 | 0.0277 |
| 1061 | P24668 | Cation-dependent mannose-6-phosphate receptor                               | M6pr     | -0.8746 | 0.0277 |
| 1062 | Q4JIM5 | Tyrosine-protein kinase ABL2                                                | Abl2     | -0.8746 | 0.0277 |
| 1063 | O08912 | Polypeptide N-acetylgalactosaminyltransferase 1                             | Galnt1   | -0.8746 | 0.0277 |
| 1064 | Q3UE37 | Ubiquitin-conjugating enzyme E2 Z                                           | Ube2z    | -0.8721 | 0.0280 |

|      |        |                                                                           |         |         |        |
|------|--------|---------------------------------------------------------------------------|---------|---------|--------|
| 1065 | P23818 | Glutamate receptor 1                                                      | Gria1   | -0.8718 | 0.0280 |
| 1066 | Q6DFW4 | Nucleolar protein 58                                                      | Nop58   | -0.8709 | 0.0283 |
| 1067 | Q8BHC1 | Ras-related protein Rab-39B                                               | Rab39b  | -0.8705 | 0.0283 |
| 1068 | Q80TL0 | Protein phosphatase 1E                                                    | Ppm1e   | -0.8690 | 0.0284 |
| 1069 | Q8BL66 | Early endosome antigen 1                                                  | Eea1    | -0.8674 | 0.0286 |
| 1070 | Q91ZJ5 | UTP--glucose-1-phosphate uridylyltransferase                              | Ugp2    | -0.8668 | 0.0286 |
| 1071 | P12382 | ATP-dependent 6-phosphofructokinase liver type                            | Pfkl    | -0.8665 | 0.0287 |
| 1072 | P80560 | Receptor-type tyrosine-protein phosphatase N2                             | Ptprn2  | -0.8652 | 0.0287 |
| 1073 | P56528 | ADP-ribosyl cyclase/cyclic ADP-ribose hydrolase 1                         | Cd38    | -0.8652 | 0.0287 |
| 1074 | Q9D8X1 | Copper homeostasis protein cutC homolog                                   | Cutc    | -0.8652 | 0.0287 |
| 1075 | Q61595 | Kinectin                                                                  | Ktn1    | -0.8652 | 0.0287 |
| 1076 | Q9DCR2 | AP-3 complex subunit sigma-1                                              | Ap3s1   | -0.8652 | 0.0287 |
| 1077 | Q60749 | KH domain-containing RNA-binding signal transduction-associated protein 1 | Khdrbs1 | -0.8648 | 0.0288 |
| 1078 | P62270 | 40S ribosomal protein S18                                                 | Rps18   | -0.8629 | 0.0289 |
| 1079 | P98084 | Amyloid-beta A4 precursor protein-binding family A member 2               | Apba2   | -0.8628 | 0.0289 |
| 1080 | Q91WK5 | Glycine cleavage system H protein mitochondrial                           | Gcsh    | -0.8628 | 0.0289 |
| 1081 | Q9ROQ6 | Actin-related protein 2/3 complex subunit 1A                              | Arpc1a  | -0.8626 | 0.0289 |
| 1082 | P21447 | ATP-dependent translocase ABCB1                                           | Abcb1a  | -0.8614 | 0.0291 |
| 1083 | P61161 | Actin-related protein 2                                                   | Actr2   | -0.8610 | 0.0292 |
| 1084 | Q8BMS4 | Ubiquinone biosynthesis O-methyltransferase mitochondrial                 | Coq3    | -0.8599 | 0.0292 |
| 1085 | Q9DD02 | Protein Hikeshi                                                           | Hikeshi | -0.8599 | 0.0292 |
| 1086 | Q91V57 | N-chimaerin                                                               | Chn1    | -0.8599 | 0.0292 |
| 1087 | Q5Y4Y6 | Gasdermin-A3                                                              | Gsdma3  | -0.8599 | 0.0292 |
| 1088 | Q8BHN3 | Neutral alpha-glucosidase AB                                              | Ganab   | -0.8587 | 0.0294 |
| 1089 | Q8BH74 | Nuclear pore complex protein Nup107                                       | Nup107  | -0.8573 | 0.0295 |
| 1090 | P15208 | Insulin receptor                                                          | Insr    | -0.8573 | 0.0295 |
| 1091 | Q6P4S8 | Integrator complex subunit 1                                              | Ints1   | -0.8573 | 0.0295 |
| 1092 | P97461 | 40S ribosomal protein S5                                                  | Rps5    | -0.8542 | 0.0297 |
| 1093 | Q8R1V4 | Transmembrane emp24 domain-containing protein 4                           | Tmed4   | -0.8537 | 0.0297 |
| 1094 | Q9CQM5 | Thioredoxin domain-containing protein 17                                  | Txndc17 | -0.8537 | 0.0297 |
| 1095 | P62320 | Small nuclear ribonucleoprotein Sm D3                                     | Snrpd3  | -0.8537 | 0.0297 |
| 1096 | Q99J36 | THUMP domain-containing protein 1                                         | Thumpd1 | -0.8532 | 0.0298 |
| 1097 | P51150 | Ras-related protein Rab-7a                                                | Rab7a   | -0.8523 | 0.0298 |
| 1098 | P28271 | Cytoplasmic aconitate hydratase                                           | Aco1    | -0.8520 | 0.0298 |
| 1099 | Q8R5C5 | Beta-centractin                                                           | Actr1b  | -0.8511 | 0.0299 |

Supplementary Table 3.

| Number | Accession | Protein Name                                                         | Gene Name       | PLGEM-STN | p Value |
|--------|-----------|----------------------------------------------------------------------|-----------------|-----------|---------|
| 1      | O70340    | Neuronal pentraxin-2                                                 | <i>Nptx2</i>    | 3.4226    | 0.0001  |
| 2      | Q14DL0    | Ubiquilin-like protein                                               | <i>Ubqln1</i>   | 3.2976    | 0.0002  |
| 3      | Q7TSJ2    | Microtubule-associated protein 6                                     | <i>Map6</i>     | 3.2974    | 0.0002  |
| 4      | P20612    | Guanine nucleotide-binding protein G(t) subunit alpha-1              | <i>Gnat1</i>    | 3.2250    | 0.0002  |
| 5      | P50149    | Guanine nucleotide-binding protein G(t) subunit alpha-2              | <i>Gnat2</i>    | 3.2172    | 0.0002  |
| 6      | P04925    | Major prion protein                                                  | <i>Prnp</i>     | 3.2049    | 0.0002  |
| 7      | Q8CGK7    | Guanine nucleotide-binding protein G(olf) subunit alpha              | <i>Gnal</i>     | 3.1616    | 0.0002  |
| 8      | Q3V3I2    | Guanine nucleotide-binding protein G(t) subunit alpha-3              | <i>Gnat3</i>    | 3.1521    | 0.0002  |
| 9      | P27600    | Guanine nucleotide-binding protein subunit alpha-12                  | <i>Gna12</i>    | 3.1467    | 0.0002  |
| 10     | B2RSH2    | Guanine nucleotide-binding protein G(i) subunit alpha-1              | <i>Gnai1</i>    | 2.8841    | 0.0003  |
| 11     | Q9DC51    | Guanine nucleotide-binding protein G(i) subunit alpha-3              | <i>Gnai3</i>    | 2.8207    | 0.0003  |
| 12     | D3YVF0    | A-kinase anchor protein 5                                            | <i>Akap5</i>    | 2.8144    | 0.0003  |
| 13     | O08599    | Syntaxin-binding protein 1                                           | <i>Stxbp1</i>   | 2.8054    | 0.0003  |
| 14     | Q811Q9    | Choline-phosphate cytidyltransferase B                               | <i>Pcyt1b</i>   | 2.7984    | 0.0003  |
| 15     | P14733    | Lamin-B1                                                             | <i>Lmnb1</i>    | 2.7820    | 0.0003  |
| 16     | Q922P8    | Transmembrane protein 132A                                           | <i>Tmem132a</i> | 2.7385    | 0.0003  |
| 17     | Q9WV92    | Band 4.1-like protein 3                                              | <i>Epb41b3</i>  | 2.6512    | 0.0003  |
| 18     | P26645    | Myristoylated alanine-rich C-kinase substrate                        | <i>Marcks</i>   | 2.5879    | 0.0004  |
| 19     | Q811P8    | Rho GTPase-activating protein 32                                     | <i>Arhgap32</i> | 2.5813    | 0.0004  |
| 20     | B1AZI6    | THO complex subunit 2                                                | <i>Thoc2</i>    | 2.5587    | 0.0004  |
| 21     | Q4FZC9    | Nesprin-3                                                            | <i>Syne3</i>    | 2.4903    | 0.0004  |
| 22     | Q61072    | Disintegrin and metalloproteinase domain-containing protein 9        | <i>Adam9</i>    | 2.4892    | 0.0004  |
| 23     | P08752    | Guanine nucleotide-binding protein G(i) subunit alpha-2              | <i>Gnai2</i>    | 2.4740    | 0.0004  |
| 24     | Q6Q477    | Plasma membrane calcium-transporting ATPase 4                        | <i>Atp2b4</i>   | 2.4506    | 0.0004  |
| 25     | E9PZ19    | Protein turtle homolog B                                             | <i>Igsf9b</i>   | 2.4439    | 0.0004  |
| 26     | P48678    | Prelamin-A/C                                                         | <i>Lmna</i>     | 2.4418    | 0.0004  |
| 27     | Q8CFN5    | Myocyte-specific enhancer factor 2C                                  | <i>Mef2c</i>    | 2.3636    | 0.0005  |
| 28     | P62881    | Guanine nucleotide-binding protein subunit beta-5                    | <i>Gnb5</i>     | 2.3562    | 0.0005  |
| 29     | Q5DTL9    | Sodium-driven chloride bicarbonate exchanger                         | <i>Slc4a10</i>  | 2.3511    | 0.0005  |
| 30     | Q3UKJ7    | WD40 repeat-containing protein SMU1                                  | <i>Smu1</i>     | 2.3293    | 0.0005  |
| 31     | Q91YT0    | NADH dehydrogenase [ubiquinone] flavoprotein 1 mitochondrial         | <i>Ndufv1</i>   | 2.3192    | 0.0005  |
| 32     | Q6R0H7    | Guanine nucleotide-binding protein G(s) subunit alpha isoforms XLas  | <i>Gnas</i>     | 2.3025    | 0.0005  |
| 33     | P27601    | Guanine nucleotide-binding protein subunit alpha-13                  | <i>Gna13</i>    | 2.2781    | 0.0006  |
| 34     | Q5SVL6    | Rap1 GTPase-activating protein 2                                     | <i>Rap1gap2</i> | 2.2711    | 0.0006  |
| 35     | P63094    | Guanine nucleotide-binding protein G(s) subunit alpha isoforms short | <i>Gnas</i>     | 2.2592    | 0.0006  |
| 36     | P43276    | Histone H1.5                                                         | <i>H1-5</i>     | 2.2263    | 0.0006  |
| 37     | P31324    | cAMP-dependent protein kinase type II-beta regulatory subunit        | <i>Prkar2b</i>  | 2.2116    | 0.0006  |
| 38     | Q9QW16    | SRC kinase signaling inhibitor 1                                     | <i>Srcin1</i>   | 2.2066    | 0.0006  |
| 39     | P49025    | Citron Rho-interacting kinase                                        | <i>Cit</i>      | 2.2043    | 0.0006  |
| 40     | O08919    | Numb-like protein                                                    | <i>Numbl</i>    | 2.1861    | 0.0006  |
| 41     | Q8VIJ6    | Splicing factor proline- and glutamine-rich                          | <i>Sfpq</i>     | 2.1761    | 0.0007  |
| 42     | A2AQ25    | Sickle tail protein                                                  | <i>Skt</i>      | 2.1616    | 0.0007  |
| 43     | Q07409    | Contactin-3                                                          | <i>Cntn3</i>    | 2.1175    | 0.0007  |
| 44     | Q8JZK9    | Hydroxymethylglutaryl-CoA synthase cytoplasmic                       | <i>Hmgcs1</i>   | 2.1072    | 0.0007  |
| 45     | Q80UG5    | Septin-9                                                             | <i>Septin9</i>  | 2.1050    | 0.0007  |
| 46     | Q9R0K7    | Plasma membrane calcium-transporting ATPase 2                        | <i>Atp2b2</i>   | 2.0905    | 0.0008  |
| 47     | Q3UXZ6    | Protein FAM81A                                                       | <i>Fam81a</i>   | 2.0626    | 0.0008  |
| 48     | Q8C1B7    | Septin-11                                                            | <i>Septin11</i> | 2.0570    | 0.0008  |
| 49     | O08644    | Ephrin type-B receptor 6                                             | <i>Ephb6</i>    | 2.0553    | 0.0008  |
| 50     | Q99104    | Unconventional myosin-Va                                             | <i>Myo5a</i>    | 2.0398    | 0.0008  |
| 51     | Q80XD1    | Beta-chimaerin                                                       | <i>Chn2</i>     | 2.0371    | 0.0008  |
| 52     | Q99M74    | Keratin type II cuticular Hb2                                        | <i>Krt82</i>    | 2.0371    | 0.0008  |
| 53     | Q8QZY1    | Eukaryotic translation initiation factor 3 subunit L                 | <i>Eif3l</i>    | 2.0284    | 0.0008  |
| 54     | Q08091    | Calponin-1                                                           | <i>Cnn1</i>     | 1.9997    | 0.0009  |
| 55     | Q61001    | Laminin subunit alpha-5                                              | <i>Lama5</i>    | 1.9950    | 0.0009  |
| 56     | Q8K310    | Matrin-3                                                             | <i>Matr3</i>    | 1.9737    | 0.0009  |
| 57     | Q8BLE7    | Vesicular glutamate transporter 2                                    | <i>Slc17a6</i>  | 1.9423    | 0.0010  |
| 58     | Q3TVA9    | Coiled-coil domain-containing protein 136                            | <i>Ccdc136</i>  | 1.9397    | 0.0010  |
| 59     | P28665    | Murinoglobulin-1                                                     | <i>Mug1</i>     | 1.9293    | 0.0011  |
| 60     | Q9CS84    | Neurexin-1                                                           | <i>Nrxn1</i>    | 1.9254    | 0.0011  |
| 61     | Q8CHT1    | Ephexin-1                                                            | <i>Ngef</i>     | 1.9241    | 0.0011  |

|     |        |                                                                       |                 |        |        |
|-----|--------|-----------------------------------------------------------------------|-----------------|--------|--------|
| 62  | Q8K010 | 5-oxoprolinase                                                        | <i>Oplah</i>    | 1.9136 | 0.0011 |
| 63  | Q9DBS9 | Oxysterol-binding protein-related protein 3                           | <i>Osbpl3</i>   | 1.8906 | 0.0011 |
| 64  | P12849 | cAMP-dependent protein kinase type I-beta regulatory subunit          | <i>Prkar1b</i>  | 1.8758 | 0.0012 |
| 65  | Q8VHJ5 | Serine/threonine-protein kinase MARK1                                 | <i>Mark1</i>    | 1.8671 | 0.0012 |
| 66  | O09012 | Peroxisomal targeting signal 1 receptor                               | <i>Pex5</i>     | 1.8568 | 0.0012 |
| 67  | Q62132 | Receptor-type tyrosine-protein phosphatase R                          | <i>Ptprr</i>    | 1.8568 | 0.0012 |
| 68  | Q8BYW1 | Rho GTPase-activating protein 25                                      | <i>Arhgap25</i> | 1.8568 | 0.0012 |
| 69  | Q9D486 | C-Maf-inducing protein                                                | <i>Cmip</i>     | 1.8568 | 0.0012 |
| 70  | D3YZU1 | SH3 and multiple ankyrin repeat domains protein 1                     | <i>Shank1</i>   | 1.8556 | 0.0012 |
| 71  | E9PUL5 | Proline-rich transmembrane protein 2                                  | <i>Prrt2</i>    | 1.8513 | 0.0012 |
| 72  | Q9QWY8 | Arf-GAP with SH3 domain ANK repeat and PH domain-containing protein 1 | <i>Asap1</i>    | 1.8460 | 0.0012 |
| 73  | Q8BYN5 | FSD1-like protein                                                     | <i>Fsd1l</i>    | 1.8438 | 0.0012 |
| 74  | Q8CGI1 | Protein FAM193A                                                       | <i>Fam193a</i>  | 1.8331 | 0.0012 |
| 75  | Q6P4T0 | Autophagy-related protein 2 homolog A                                 | <i>Atg2a</i>    | 1.8215 | 0.0012 |
| 76  | P97490 | Adenylate cyclase type 8                                              | <i>Adcy8</i>    | 1.8215 | 0.0012 |
| 77  | Q9WVA3 | Mitotic checkpoint protein BUB3                                       | <i>Bub3</i>     | 1.8174 | 0.0012 |
| 78  | O35954 | Membrane-associated phosphatidylinositol transfer protein 1           | <i>Pitpnm1</i>  | 1.8164 | 0.0012 |
| 79  | Q9QZS3 | Protein numb homolog                                                  | <i>Numb</i>     | 1.8160 | 0.0012 |
| 80  | Q04750 | DNA topoisomerase 1                                                   | <i>Top1</i>     | 1.8067 | 0.0013 |
| 81  | O89053 | Coronin-1A                                                            | <i>Coro1a</i>   | 1.8030 | 0.0013 |
| 82  | P48318 | Glutamate decarboxylase 1                                             | <i>Gad1</i>     | 1.7891 | 0.0013 |
| 83  | P20357 | Microtubule-associated protein 2                                      | <i>Map2</i>     | 1.7862 | 0.0013 |
| 84  | Q6PE01 | U5 small nuclear ribonucleoprotein 40 kDa protein                     | <i>Snrnp40</i>  | 1.7830 | 0.0013 |
| 85  | Q6P9K8 | Caskin-1                                                              | <i>Caskin1</i>  | 1.7724 | 0.0014 |
| 86  | P18872 | Guanine nucleotide-binding protein G(o) subunit alpha                 | <i>Gnao1</i>    | 1.7591 | 0.0014 |
| 87  | Q61024 | Asparagine synthetase [glutamine-hydrolyzing]                         | <i>Asns</i>     | 1.7588 | 0.0014 |
| 88  | Q7TT37 | Elongator complex protein 1                                           | <i>Elp1</i>     | 1.7568 | 0.0015 |
| 89  | A2ALS5 | Rap1 GTPase-activating protein 1                                      | <i>Rap1gap</i>  | 1.7544 | 0.0015 |
| 90  | Q63912 | Oligodendrocyte-myelin glycoprotein                                   | <i>Omg</i>      | 1.7311 | 0.0015 |
| 91  | Q8VD12 | Zinc finger protein 385A                                              | <i>Znf385a</i>  | 1.7285 | 0.0015 |
| 92  | Q6NZ16 | Eukaryotic translation initiation factor 4 gamma 1                    | <i>Eif4g1</i>   | 1.7280 | 0.0015 |
| 93  | Q5DU25 | IQ motif and SEC7 domain-containing protein 2                         | <i>Iqsec2</i>   | 1.7203 | 0.0015 |
| 94  | Q9JKY5 | Huntingtin-interacting protein 1-related protein                      | <i>Hip1r</i>    | 1.7137 | 0.0015 |
| 95  | Q8C7H1 | Methylmalonic aciduria type A homolog mitochondrial                   | <i>Mmaa</i>     | 1.6796 | 0.0016 |
| 96  | O88737 | Protein bassoon                                                       | <i>Bsn</i>      | 1.6759 | 0.0016 |
| 97  | Q570Y9 | DEP domain-containing mTOR-interacting protein                        | <i>Deptor</i>   | 1.6689 | 0.0016 |
| 98  | P63056 | Noelin-3                                                              | <i>Olfm3</i>    | 1.6689 | 0.0016 |
| 99  | P26231 | Catenin alpha-1                                                       | <i>Ctnna1</i>   | 1.6630 | 0.0016 |
| 100 | Q6QD59 | Vesicle transport protein SEC20                                       | <i>Bnip1</i>    | 1.6575 | 0.0016 |
| 101 | Q6PDG5 | SWI/SNF complex subunit SMARCC2                                       | <i>Smarcc2</i>  | 1.6549 | 0.0016 |
| 102 | Q7TNR6 | Immunoglobulin superfamily member 21                                  | <i>Igsf21</i>   | 1.6529 | 0.0016 |
| 103 | Q9WTX6 | Cullin-1                                                              | <i>Cul1</i>     | 1.6453 | 0.0017 |
| 104 | Q7TQG1 | Pleckstrin homology domain-containing family A member 6               | <i>Plekha6</i>  | 1.6319 | 0.0017 |
| 105 | Q6PIC6 | Sodium/potassium-transporting ATPase subunit alpha-3                  | <i>Atp1a3</i>   | 1.6278 | 0.0017 |
| 106 | Q80U72 | Protein scribble homolog                                              | <i>Scrib</i>    | 1.5995 | 0.0018 |
| 107 | Q8C2Q3 | RNA-binding protein 14                                                | <i>Rbm14</i>    | 1.5926 | 0.0018 |
| 108 | Q00422 | GA-binding protein alpha chain                                        | <i>Gabpa</i>    | 1.5912 | 0.0018 |
| 109 | Q5Y4Y6 | Gasdermin-A3                                                          | <i>Gsdma3</i>   | 1.5912 | 0.0018 |
| 110 | Q8BM13 | Noelin-2                                                              | <i>Olfm2</i>    | 1.5890 | 0.0018 |
| 111 | Q6VNB8 | WD repeat and FYVE domain-containing protein 3                        | <i>Wdfy3</i>    | 1.5837 | 0.0018 |
| 112 | Q8CC35 | Synaptopodin                                                          | <i>Synpo</i>    | 1.5826 | 0.0019 |
| 113 | Q5DU31 | Interactor protein for cytohesin exchange factors 1                   | <i>Ipcef1</i>   | 1.5813 | 0.0019 |
| 114 | Q8K4P8 | E3 ubiquitin-protein ligase HECW1                                     | <i>Hecw1</i>    | 1.5813 | 0.0019 |
| 115 | P47962 | 60S ribosomal protein L5                                              | <i>Rpl5</i>     | 1.5770 | 0.0019 |
| 116 | Q61137 | Astrotactin-1                                                         | <i>Astn1</i>    | 1.5734 | 0.0019 |
| 117 | Q8R0A7 | Uncharacterized protein KIAA0513                                      | <i>Kiaa0513</i> | 1.5698 | 0.0019 |
| 118 | Q8CG72 | ADP-ribose glycohydrolase ARH3                                        | <i>Adprs</i>    | 1.5648 | 0.0019 |
| 119 | E9Q7X7 | Neurexin-2                                                            | <i>Nrxn2</i>    | 1.5632 | 0.0019 |
| 120 | Q62283 | Tetraspanin-7                                                         | <i>Tspan7</i>   | 1.5543 | 0.0019 |
| 121 | Q9DBR3 | Armado repeat-containing protein 8                                    | <i>Armc8</i>    | 1.5495 | 0.0019 |
| 122 | Q99P47 | Contactin-associated protein-like 4                                   | <i>Cntnap4</i>  | 1.5488 | 0.0019 |
| 123 | P07310 | Creatine kinase M-type                                                | <i>Ckm</i>      | 1.5465 | 0.0020 |
| 124 | Q8VCN9 | Tubulin-specific chaperone C                                          | <i>Tbcc</i>     | 1.5300 | 0.0021 |

|     |        |                                                                      |                 |        |        |
|-----|--------|----------------------------------------------------------------------|-----------------|--------|--------|
| 125 | Q8R4U6 | DNA topoisomerase I mitochondrial                                    | <i>Top1mt</i>   | 1.5266 | 0.0021 |
| 126 | Q149F3 | Eukaryotic peptide chain release factor GTP-binding subunit ERF3B    | <i>Gspt2</i>    | 1.5251 | 0.0021 |
| 127 | Q61271 | Activin receptor type-1B                                             | <i>Acvr1b</i>   | 1.5138 | 0.0021 |
| 128 | Q3UTZ3 | Trafficking protein particle complex subunit 14                      | <i>Trappc14</i> | 1.5038 | 0.0022 |
| 129 | F8VPU2 | FERM ARHGEF and pleckstrin domain-containing protein 1               | <i>Farp1</i>    | 1.4974 | 0.0022 |
| 130 | Q6PFD5 | Disks large-associated protein 3                                     | <i>Dlgap3</i>   | 1.4967 | 0.0022 |
| 131 | P11983 | T-complex protein 1 subunit alpha                                    | <i>Tcp1</i>     | 1.4958 | 0.0022 |
| 132 | P15533 | Tripartite motif-containing protein 30A                              | <i>Trim30a</i>  | 1.4956 | 0.0022 |
| 133 | P52800 | Ephrin-B2                                                            | <i>Efnb2</i>    | 1.4938 | 0.0022 |
| 134 | Q8QZV7 | Integrator complex subunit 13                                        | <i>IntS13</i>   | 1.4938 | 0.0022 |
| 135 | O55131 | Septin-7                                                             | <i>Septin7</i>  | 1.4882 | 0.0023 |
| 136 | Q3UY34 | Protein CUST                                                         | <i>Custos</i>   | 1.4740 | 0.0024 |
| 137 | Q922L6 | Negative elongation factor D                                         | <i>Nelfcd</i>   | 1.4740 | 0.0024 |
| 138 | Q80U49 | Centrosomal protein of 170 kDa protein B                             | <i>Cep170b</i>  | 1.4732 | 0.0024 |
| 139 | Q8BGW1 | Alpha-ketoglutarate-dependent dioxygenase FTO                        | <i>Fto</i>      | 1.4719 | 0.0024 |
| 140 | P31750 | RAC-alpha serine/threonine-protein kinase                            | <i>Akt1</i>     | 1.4705 | 0.0024 |
| 141 | O88447 | Kinesin light chain 1                                                | <i>Klc1</i>     | 1.4687 | 0.0024 |
| 142 | P43006 | Excitatory amino acid transporter 2                                  | <i>Slc1a2</i>   | 1.4680 | 0.0024 |
| 143 | P53986 | Monocarboxylate transporter 1                                        | <i>Slc16a1</i>  | 1.4661 | 0.0024 |
| 144 | Q61301 | Catenin alpha-2                                                      | <i>Ctnna2</i>   | 1.4648 | 0.0024 |
| 145 | P07901 | Heat shock protein HSP 90-alpha                                      | <i>Hsp90aa1</i> | 1.4623 | 0.0025 |
| 146 | P11499 | Heat shock protein HSP 90-beta                                       | <i>Hsp90ab1</i> | 1.4621 | 0.0025 |
| 147 | P07724 | Albumin                                                              | <i>Alb</i>      | 1.4617 | 0.0025 |
| 148 | Q8K2K6 | Arf-GAP domain and FG repeat-containing protein 1                    | <i>Agfg1</i>    | 1.4608 | 0.0025 |
| 149 | P49586 | Choline-phosphate cytidyltransferase A                               | <i>Pcyt1a</i>   | 1.4595 | 0.0025 |
| 150 | Q0KK59 | Protein unc-79 homolog                                               | <i>Unc79</i>    | 1.4595 | 0.0025 |
| 151 | Q9JJA9 | General receptor for phosphoinositides 1-associated scaffold protein | <i>Tamalin</i>  | 1.4511 | 0.0025 |
| 152 | P01901 | H-2 class I histocompatibility antigen K-B alpha chain               | <i>H2-K1</i>    | 1.4489 | 0.0025 |
| 153 | Q62165 | Dystroglycan                                                         | <i>Dag1</i>     | 1.4487 | 0.0025 |
| 154 | Q8VD65 | Phosphoinositide 3-kinase regulatory subunit 4                       | <i>Pik3r4</i>   | 1.4478 | 0.0026 |
| 155 | Q8CJ19 | [F-actin]-monooxygenase MICAL3                                       | <i>Mical3</i>   | 1.4462 | 0.0026 |
| 156 | Q63943 | Myocyte-specific enhancer factor 2D                                  | <i>Mef2d</i>    | 1.4407 | 0.0026 |
| 157 | Q80YF9 | Rho GTPase-activating protein 33                                     | <i>Arhgap33</i> | 1.4393 | 0.0026 |
| 158 | Q920Q4 | Vacuolar protein sorting-associated protein 16 homolog               | <i>Vps16</i>    | 1.4239 | 0.0027 |
| 159 | Q8BH60 | Golgi-associated PDZ and coiled-coil motif-containing protein        | <i>Gopc</i>     | 1.4202 | 0.0030 |
| 160 | Q8C525 | Protein MB21D2                                                       | <i>Mb21d2</i>   | 1.4202 | 0.0030 |
| 161 | O35926 | Cyclin-dependent kinase 5 activator 2                                | <i>Cdk5r2</i>   | 1.4202 | 0.0030 |
| 162 | P97386 | DNA ligase 3                                                         | <i>Lig3</i>     | 1.4202 | 0.0030 |
| 163 | A2AKX3 | Probable helicase senataxin                                          | <i>Setx</i>     | 1.4202 | 0.0030 |
| 164 | Q8CJ61 | CKLF-like MARVEL transmembrane domain-containing protein 4           | <i>Cmtm4</i>    | 1.4087 | 0.0031 |
| 165 | Q9WUA6 | RAC-gamma serine/threonine-protein kinase                            | <i>Akt3</i>     | 1.4068 | 0.0031 |
| 166 | P10852 | 4F2 cell-surface antigen heavy chain                                 | <i>Slc3a2</i>   | 1.4045 | 0.0031 |
| 167 | Q8BRT1 | CLIP-associating protein 2                                           | <i>Clasp2</i>   | 1.4013 | 0.0031 |
| 168 | Q9D8X2 | Coiled-coil domain-containing protein 124                            | <i>Ccdc124</i>  | 1.3985 | 0.0031 |
| 169 | Q99KR3 | Endoribonuclease LACTB2                                              | <i>Lactb2</i>   | 1.3973 | 0.0032 |
| 170 | Q64314 | Hematopoietic progenitor cell antigen CD34                           | <i>Cd34</i>     | 1.3973 | 0.0032 |
| 171 | P52479 | Ubiquitin carboxyl-terminal hydrolase 10                             | <i>Usp10</i>    | 1.3952 | 0.0032 |
| 172 | Q61233 | Plastin-2                                                            | <i>Lcp1</i>     | 1.3824 | 0.0034 |
| 173 | Q8CIP4 | MAP/microtubule affinity-regulating kinase 4                         | <i>Mark4</i>    | 1.3797 | 0.0034 |
| 174 | Q80YX1 | Tenascin                                                             | <i>Tnc</i>      | 1.3793 | 0.0034 |
| 175 | Q60823 | RAC-beta serine/threonine-protein kinase                             | <i>Akt2</i>     | 1.3766 | 0.0034 |
| 176 | P34914 | Bifunctional epoxide hydrolase 2                                     | <i>Ephx2</i>    | 1.3714 | 0.0035 |
| 177 | P50446 | Keratin type II cytoskeletal 6A                                      | <i>Krt6a</i>    | 1.3665 | 0.0035 |
| 178 | Q91ZM2 | SH2B adapter protein 1                                               | <i>Sh2b1</i>    | 1.3640 | 0.0035 |
| 179 | Q9EQF6 | Dihydropyrimidinase-related protein 5                                | <i>Dpysl5</i>   | 1.3608 | 0.0035 |
| 180 | Q8K0D0 | Cyclin-dependent kinase 17                                           | <i>Cdk17</i>    | 1.3582 | 0.0036 |
| 181 | Q6A009 | E3 ubiquitin-protein ligase listerin                                 | <i>Ltn1</i>     | 1.3552 | 0.0036 |
| 182 | Q00560 | Interleukin-6 receptor subunit beta                                  | <i>Il6st</i>    | 1.3530 | 0.0036 |
| 183 | Q6P5U7 | NACHT and WD repeat domain-containing protein 2                      | <i>Nwd2</i>     | 1.3521 | 0.0036 |
| 184 | Q9QXS1 | Plectin                                                              | <i>Plec</i>     | 1.3496 | 0.0037 |
| 185 | Q9JI39 | ATP-binding cassette sub-family B member 10 mitochondrial            | <i>Abcb10</i>   | 1.3485 | 0.0037 |
| 186 | Q3TIR3 | Synembryn-A                                                          | <i>Ric8a</i>    | 1.3447 | 0.0037 |
| 187 | Q8JZP2 | Synapsin-3                                                           | <i>Syn3</i>     | 1.3427 | 0.0037 |

|     |        |                                                                   |                 |        |        |
|-----|--------|-------------------------------------------------------------------|-----------------|--------|--------|
| 188 | O70174 | Neuronal acetylcholine receptor subunit alpha-4                   | <i>Chrna4</i>   | 1.3419 | 0.0037 |
| 189 | Q91Y63 | Solute carrier family 13 member 3                                 | <i>Slc13a3</i>  | 1.3419 | 0.0037 |
| 190 | Q8C9B9 | Death-inducer obliterator 1                                       | <i>Dido1</i>    | 1.3419 | 0.0037 |
| 191 | A2A8U2 | Transmembrane protein 201                                         | <i>Tmem201</i>  | 1.3419 | 0.0037 |
| 192 | Q6ZQA6 | Immunoglobulin superfamily member 3                               | <i>Igsf3</i>    | 1.3419 | 0.0037 |
| 193 | Q8C5K5 | Uncharacterized protein CXorf38 homolog                           |                 | 1.3419 | 0.0037 |
| 194 | Q922K7 | Probable 28S rRNA (cytosine-C(5))-methyltransferase               | <i>Nop2</i>     | 1.3419 | 0.0037 |
| 195 | Q91V17 | E3 ubiquitin-protein ligase ZNRF1                                 | <i>Znrf1</i>    | 1.3419 | 0.0037 |
| 196 | Q91YT2 | E3 ubiquitin-protein ligase RNF185                                | <i>Rnf185</i>   | 1.3419 | 0.0037 |
| 197 | Q9CWX9 | Probable ATP-dependent RNA helicase DDX47                         | <i>Ddx47</i>    | 1.3419 | 0.0037 |
| 198 | P22933 | Gamma-aminobutyric acid receptor subunit delta                    | <i>Gabrd</i>    | 1.3419 | 0.0037 |
| 199 | Q91V14 | Solute carrier family 12 member 5                                 | <i>Slc12a5</i>  | 1.3380 | 0.0037 |
| 200 | Q9Z2Q6 | Septin-5                                                          | <i>Septin5</i>  | 1.3374 | 0.0037 |
| 201 | Q8JZ50 | Protein lin-7 homolog A                                           | <i>Lin7a</i>    | 1.3362 | 0.0040 |
| 202 | Q80TK0 | AP2-interacting clathrin-endocytosis protein                      | <i>Kiaa1107</i> | 1.3317 | 0.0040 |
| 203 | Q8BUR4 | Dedicator of cytokinesis protein 1                                | <i>Dock1</i>    | 1.3317 | 0.0040 |
| 204 | O35927 | Catenin delta-2                                                   | <i>Ctnnd2</i>   | 1.3315 | 0.0040 |
| 205 | Q64096 | Guanine nucleotide exchange factor DBS                            | <i>Mcf2l</i>    | 1.3279 | 0.0040 |
| 206 | Q9WVR4 | Fragile X mental retardation syndrome-related protein 2           | <i>Fxr2</i>     | 1.3271 | 0.0040 |
| 207 | Q8CFE4 | SCY1-like protein 2                                               | <i>Scyl2</i>    | 1.3243 | 0.0040 |
| 208 | Q9QZB0 | Regulator of G-protein signaling 17                               | <i>Rgs17</i>    | 1.3242 | 0.0040 |
| 209 | Q5DTT2 | PH and SEC7 domain-containing protein 1                           | <i>Psd</i>      | 1.3223 | 0.0041 |
| 210 | O88643 | Serine/threonine-protein kinase PAK 1                             | <i>Pak1</i>     | 1.3203 | 0.0041 |
| 211 | Q3UTQ8 | Cyclin-dependent kinase-like 5                                    | <i>Cdkl5</i>    | 1.3200 | 0.0041 |
| 212 | Q6V455 | Protein sidekick-2                                                | <i>Sdk2</i>     | 1.3177 | 0.0041 |
| 213 | Q9QYJ3 | DnaJ homolog subfamily B member 1                                 | <i>Dnajb1</i>   | 1.3170 | 0.0041 |
| 214 | E9Q912 | Rap1 GTPase-GDP dissociation stimulator 1                         | <i>Rap1gds1</i> | 1.3166 | 0.0041 |
| 215 | P14206 | 40S ribosomal protein SA                                          | <i>Rpsa</i>     | 1.3150 | 0.0041 |
| 216 | Q6PDN3 | Myosin light chain kinase smooth muscle                           | <i>Mylk</i>     | 1.3137 | 0.0042 |
| 217 | Q8VEH5 | EPM2A-interacting protein 1                                       | <i>Epm2aip1</i> | 1.3134 | 0.0042 |
| 218 | Q80XL6 | Acyl-CoA dehydrogenase family member 11                           | <i>Acad11</i>   | 1.3034 | 0.0043 |
| 219 | Q3UTJ2 | Sorbin and SH3 domain-containing protein 2                        | <i>Sorbs2</i>   | 1.3009 | 0.0043 |
| 220 | Q61644 | Protein kinase C and casein kinase substrate in neurons protein 1 | <i>Pacsin1</i>  | 1.2991 | 0.0044 |
| 221 | Q8BJ42 | Disks large-associated protein 2                                  | <i>Dlgap2</i>   | 1.2970 | 0.0044 |
| 222 | P34152 | Focal adhesion kinase 1                                           | <i>Ptk2</i>     | 1.2947 | 0.0044 |
| 223 | Q9JKS5 | Intracellular hyaluronan-binding protein 4                        | <i>Habp4</i>    | 1.2946 | 0.0044 |
| 224 | Q8C078 | Calcium/calmodulin-dependent protein kinase kinase 2              | <i>Camkk2</i>   | 1.2920 | 0.0044 |
| 225 | Q91WJ8 | Far upstream element-binding protein 1                            | <i>Fubp1</i>    | 1.2912 | 0.0044 |
| 226 | Q8C4G9 | Adhesion G protein-coupled receptor A1                            | <i>Adgra1</i>   | 1.2907 | 0.0044 |
| 227 | Q8R1F1 | Protein Niban 2                                                   | <i>Niban2</i>   | 1.2907 | 0.0044 |
| 228 | Q8BUH8 | Sentrin-specific protease 7                                       | <i>Senp7</i>    | 1.2907 | 0.0044 |
| 229 | Q05BC3 | Echinoderm microtubule-associated protein-like 1                  | <i>Eml1</i>     | 1.2902 | 0.0044 |
| 230 | O08808 | Protein diaphanous homolog 1                                      | <i>Diaph1</i>   | 1.2858 | 0.0045 |
| 231 | P28867 | Protein kinase C delta type                                       | <i>Prkcd</i>    | 1.2855 | 0.0045 |
| 232 | Q9QXT8 | Calsenilin                                                        | <i>Kcnp3</i>    | 1.2855 | 0.0045 |
| 233 | B2RQL2 | Storkhead-box protein 1                                           | <i>Stox1</i>    | 1.2849 | 0.0045 |
| 234 | Q9JME5 | AP-3 complex subunit beta-2                                       | <i>Ap3b2</i>    | 1.2836 | 0.0045 |
| 235 | Q6PGB6 | N-alpha-acetyltransferase 50                                      | <i>Naa50</i>    | 1.2791 | 0.0046 |
| 236 | P08775 | DNA-directed RNA polymerase II subunit RPB1                       | <i>Polr2a</i>   | 1.2787 | 0.0046 |
| 237 | Q69Z98 | Serine/threonine-protein kinase BRSK2                             | <i>Brsk2</i>    | 1.2774 | 0.0046 |
| 238 | Q8C6B2 | Rhotekin                                                          | <i>Rtkn</i>     | 1.2759 | 0.0046 |
| 239 | P52189 | Inward rectifier potassium channel 4                              | <i>Kcnj4</i>    | 1.2759 | 0.0046 |
| 240 | Q9CZ44 | NSFL1 cofactor p47                                                | <i>Nsfl1c</i>   | 1.2756 | 0.0046 |
| 241 | Q9QYB1 | Chloride intracellular channel protein 4                          | <i>Clic4</i>    | 1.2737 | 0.0047 |
| 242 | Q91V12 | Cytosolic acyl coenzyme A thioester hydrolase                     | <i>Acot7</i>    | 1.2664 | 0.0048 |
| 243 | Q9JJV5 | Voltage-dependent calcium channel gamma-3 subunit                 | <i>Cacng3</i>   | 1.2597 | 0.0049 |
| 244 | Q6PAV2 | Probable E3 ubiquitin-protein ligase HERC4                        | <i>Herc4</i>    | 1.2580 | 0.0049 |
| 245 | Q64735 | Complement component receptor 1-like protein                      | <i>Cr1l</i>     | 1.2490 | 0.0050 |
| 246 | Q91XL9 | Oxysterol-binding protein-related protein 1                       | <i>Osbpl1a</i>  | 1.2441 | 0.0051 |
| 247 | Q01147 | Cyclic AMP-responsive element-binding protein 1                   | <i>Creb1</i>    | 1.2421 | 0.0051 |
| 248 | Q80TY0 | Formin-binding protein 1                                          | <i>Fnbp1</i>    | 1.2416 | 0.0051 |
| 249 | Q8CI61 | BAG family molecular chaperone regulator 4                        | <i>Bag4</i>     | 1.2360 | 0.0053 |
| 250 | Q8C7D2 | Protein cereblon                                                  | <i>Crbn</i>     | 1.2360 | 0.0053 |

|     |        |                                                                            |                |        |        |
|-----|--------|----------------------------------------------------------------------------|----------------|--------|--------|
| 251 | Q9R0N3 | Synaptotagmin-11                                                           | <i>Syt11</i>   | 1.2360 | 0.0053 |
| 252 | Q9CPR7 | Suppressor of IKBKE 1                                                      | <i>Sike1</i>   | 1.2360 | 0.0053 |
| 253 | Q8BZH4 | Pogo transposable element with ZNF domain                                  | <i>Pogz</i>    | 1.2360 | 0.0053 |
| 254 | Q0PMG2 | MAM domain-containing glycosylphosphatidylinositol anchor protein 1        | <i>Mdga1</i>   | 1.2360 | 0.0053 |
| 255 | P58158 | Galactosylgalactosylxylosylprotein 3-beta-glucuronosyltransferase 3        | <i>B3gat3</i>  | 1.2360 | 0.0053 |
| 256 | Q6PDH0 | Pleckstrin homology-like domain family B member 1                          | <i>Phldb1</i>  | 1.2360 | 0.0053 |
| 257 | Q80U57 | Regulating synaptic membrane exocytosis protein 3                          | <i>Rims3</i>   | 1.2340 | 0.0054 |
| 258 | Q02357 | Ankyrin-1                                                                  | <i>Ank1</i>    | 1.2330 | 0.0054 |
| 259 | P48722 | Heat shock 70 kDa protein 4L                                               | <i>Hspa4l</i>  | 1.2291 | 0.0054 |
| 260 | Q7TNF0 | Double C2-like domain-containing protein alpha                             | <i>Doc2a</i>   | 1.2230 | 0.0056 |
| 261 | Q7TNG5 | Echinoderm microtubule-associated protein-like 2                           | <i>Eml2</i>    | 1.2225 | 0.0056 |
| 262 | Q8BRK8 | 5'-AMP-activated protein kinase catalytic subunit alpha-2                  | <i>Prkaa2</i>  | 1.2203 | 0.0057 |
| 263 | Q8K448 | Cholesterol transporter ABCA5                                              | <i>Abca5</i>   | 1.2203 | 0.0057 |
| 264 | Q02248 | Catenin beta-1                                                             | <i>Ctnnb1</i>  | 1.2173 | 0.0057 |
| 265 | Q3TY86 | Apoptosis-inducing factor 3                                                | <i>Aifm3</i>   | 1.2160 | 0.0057 |
| 266 | P51830 | Adenylate cyclase type 9                                                   | <i>Adcy9</i>   | 1.2100 | 0.0058 |
| 267 | Q9J110 | Serine/threonine-protein kinase 3                                          | <i>Stk3</i>    | 1.2099 | 0.0058 |
| 268 | Q9JIS5 | Synaptic vesicle glycoprotein 2A                                           | <i>Sv2a</i>    | 1.2053 | 0.0059 |
| 269 | P97819 | 85/88 kDa calcium-independent phospholipase A2                             | <i>Pla2g6</i>  | 1.2041 | 0.0059 |
| 270 | Q9ERE2 | Keratin type II cuticular Hb1                                              | <i>Krt81</i>   | 1.2041 | 0.0059 |
| 271 | P97861 | Keratin type II cuticular Hb6                                              | <i>Krt86</i>   | 1.2041 | 0.0059 |
| 272 | Q62095 | ATP-dependent RNA helicase DDX3Y                                           | <i>Ddx3y</i>   | 1.2039 | 0.0059 |
| 273 | A2A432 | Cullin-4B                                                                  | <i>Cul4b</i>   | 1.2036 | 0.0059 |
| 274 | Q9JHU4 | Cytoplasmic dynein 1 heavy chain 1                                         | <i>Dync1h1</i> | 1.2015 | 0.0060 |
| 275 | Q920M5 | Coronin-6                                                                  | <i>Coro6</i>   | 1.1979 | 0.0060 |
| 276 | P50608 | Fibromodulin                                                               | <i>Fmod</i>    | 1.1977 | 0.0060 |
| 277 | Q02257 | Junction plakoglobin                                                       | <i>Jup</i>     | 1.1939 | 0.0061 |
| 278 | Q99PV0 | Pre-mRNA-processing-splicing factor 8                                      | <i>Prpf8</i>   | 1.1903 | 0.0071 |
| 279 | Q3UNH4 | G protein-regulated inducer of neurite outgrowth 1                         | <i>Gprin1</i>  | 1.1882 | 0.0072 |
| 280 | O88741 | Ganglioside-induced differentiation-associated protein 1                   | <i>Gdap1</i>   | 1.1877 | 0.0073 |
| 281 | Q68EF4 | Metabotropic glutamate receptor 4                                          | <i>Grm4</i>    | 1.1870 | 0.0073 |
| 282 | Q9CWL8 | Beta-catenin-like protein 1                                                | <i>Ctnnb1</i>  | 1.1861 | 0.0073 |
| 283 | Q9ERB0 | Synaptosomal-associated protein 29                                         | <i>Snap29</i>  | 1.1861 | 0.0073 |
| 284 | Q8CAK3 | Shiftless antiviral inhibitor of ribosomal frameshifting protein homolog   | <i>Shfl</i>    | 1.1861 | 0.0073 |
| 285 | Q8BH24 | Transmembrane 9 superfamily member 4                                       | <i>Tm9sf4</i>  | 1.1861 | 0.0073 |
| 286 | Q3TLH4 | Protein PRRC2C                                                             | <i>Prrc2c</i>  | 1.1780 | 0.0077 |
| 287 | Q8K124 | Pleckstrin homology domain-containing family O member 2                    | <i>Plekho2</i> | 1.1741 | 0.0077 |
| 288 | Q9BCZ4 | Selenoprotein S                                                            | <i>Selenos</i> | 1.1741 | 0.0077 |
| 289 | P70213 | Friend virus susceptibility protein 1                                      | <i>Fv1</i>     | 1.1741 | 0.0077 |
| 290 | Q91YE3 | Egl nine homolog 1                                                         | <i>Egln1</i>   | 1.1741 | 0.0077 |
| 291 | B2RXR6 | Serine/threonine-protein phosphatase 6 regulatory ankyrin repeat subunit B | <i>Ankrd44</i> | 1.1741 | 0.0077 |
| 292 | Q9WUB0 | RanBP-type and C3HC4-type zinc finger-containing protein 1                 | <i>Rbck1</i>   | 1.1741 | 0.0077 |
| 293 | Q9D6T0 | Nitric oxide synthase-interacting protein                                  | <i>Nosip</i>   | 1.1741 | 0.0077 |
| 294 | Q7TSH4 | Centriolar coiled-coil protein of 110 kDa                                  | <i>Ccp110</i>  | 1.1741 | 0.0077 |
| 295 | Q61324 | Aryl hydrocarbon receptor nuclear translocator 2                           | <i>Arnt2</i>   | 1.1741 | 0.0077 |
| 296 | Q5BL07 | Peroxisome biogenesis factor 1                                             | <i>Pex1</i>    | 1.1741 | 0.0077 |
| 297 | Q7TN22 | Thioredoxin domain-containing protein 16                                   | <i>Txndc16</i> | 1.1741 | 0.0077 |
| 298 | Q6ZPR4 | Potassium channel subfamily T member 1                                     | <i>Kcnt1</i>   | 1.1741 | 0.0077 |
| 299 | Q91VB2 | Calcium/calmodulin-dependent protein kinase type 1G                        | <i>Camk1g</i>  | 1.1741 | 0.0077 |
| 300 | Q8VHQ4 | Ras-related protein Rab-40C                                                | <i>Rab40c</i>  | 1.1741 | 0.0077 |
| 301 | Q32M21 | Gasdermin-A2                                                               | <i>Gsdma2</i>  | 1.1741 | 0.0077 |
| 302 | P36993 | Protein phosphatase 1B                                                     | <i>Ppm1b</i>   | 1.1732 | 0.0077 |
| 303 | A2AJI0 | MAP7 domain-containing protein 1                                           | <i>Map7d1</i>  | 1.1728 | 0.0078 |
| 304 | Q8K012 | Formin-binding protein 1-like                                              | <i>Fnbp1l</i>  | 1.1710 | 0.0078 |
| 305 | P23780 | Beta-galactosidase                                                         | <i>Glb1</i>    | 1.1660 | 0.0079 |
| 306 | Q8BSK8 | Ribosomal protein S6 kinase beta-1                                         | <i>Rps6kb1</i> | 1.1636 | 0.0080 |
| 307 | O35841 | Apoptosis inhibitor 5                                                      | <i>Api5</i>    | 1.1613 | 0.0080 |
| 308 | Q8VDP4 | Cell cycle and apoptosis regulator protein 2                               | <i>Ccar2</i>   | 1.1608 | 0.0080 |
| 309 | Q9JKN6 | RNA-binding protein Nova-1                                                 | <i>Nova1</i>   | 1.1606 | 0.0080 |
| 310 | Q80TL4 | PHD finger protein 24                                                      | <i>Phf24</i>   | 1.1604 | 0.0080 |
| 311 | Q8VCT9 | Dual specificity testis-specific protein kinase 2                          | <i>Tesk2</i>   | 1.1597 | 0.0080 |
| 312 | Q9JJK8 | Serine/threonine-protein kinase ATR                                        | <i>Atr</i>     | 1.1563 | 0.0082 |
| 313 | P70303 | CTP synthase 2                                                             | <i>Ctps2</i>   | 1.1551 | 0.0083 |

|     |        |                                                                      |                 |        |        |
|-----|--------|----------------------------------------------------------------------|-----------------|--------|--------|
| 314 | Q922S4 | cGMP-dependent 3' 5'-cyclic phosphodiesterase                        | <i>Pde2a</i>    | 1.1543 | 0.0083 |
| 315 | E9Q6P5 | Tetratricopeptide repeat protein 7B                                  | <i>Ttc7b</i>    | 1.1490 | 0.0084 |
| 316 | Q99PU5 | Long-chain-fatty-acid--CoA ligase ACSBG1                             | <i>Acsbg1</i>   | 1.1456 | 0.0084 |
| 317 | P47708 | Rabphilin-3A                                                         | <i>Rph3a</i>    | 1.1453 | 0.0084 |
| 318 | P70288 | Histone deacetylase 2                                                | <i>Hdac2</i>    | 1.1406 | 0.0085 |
| 319 | Q8R555 | Cartilage acidic protein 1                                           | <i>Crtac1</i>   | 1.1406 | 0.0085 |
| 320 | Q8CIN6 | CUGBP Elav-like family member 3                                      | <i>Celf3</i>    | 1.1398 | 0.0086 |
| 321 | O54829 | Regulator of G-protein signaling 7                                   | <i>Rgs7</i>     | 1.1396 | 0.0086 |
| 322 | Q8BTI8 | Serine/arginine repetitive matrix protein 2                          | <i>Srrm2</i>    | 1.1381 | 0.0087 |
| 323 | Q9CQU5 | ZW10 interactor                                                      | <i>Zwint</i>    | 1.1346 | 0.0087 |
| 324 | Q8R0G9 | Nuclear pore complex protein Nup133                                  | <i>Nup133</i>   | 1.1330 | 0.0088 |
| 325 | Q9D6I9 | Leucine rich adaptor protein 1                                       | <i>Lurap1</i>   | 1.1330 | 0.0088 |
| 326 | Q9ES00 | Ubiquitin conjugation factor E4 B                                    | <i>Ube4b</i>    | 1.1312 | 0.0090 |
| 327 | P60882 | Multiple epidermal growth factor-like domains protein 8              | <i>Megf8</i>    | 1.1293 | 0.0091 |
| 328 | P55194 | SH3 domain-binding protein 1                                         | <i>Sh3bp1</i>   | 1.1253 | 0.0092 |
| 329 | O70400 | PDZ and LIM domain protein 1                                         | <i>Pdlim1</i>   | 1.1240 | 0.0092 |
| 330 | Q8K004 | Spermatogenesis-associated protein 2                                 | <i>Spata2</i>   | 1.1222 | 0.0092 |
| 331 | Q9D1K2 | V-type proton ATPase subunit F                                       | <i>Atp6v1f</i>  | 1.1222 | 0.0092 |
| 332 | Q3U2I3 | FHF complex subunit HOOK interacting protein 1B                      | <i>Fhip1b</i>   | 1.1222 | 0.0092 |
| 333 | Q8BWT5 | Disco-interacting protein 2 homolog A                                | <i>Dip2a</i>    | 1.1219 | 0.0093 |
| 334 | A2ADY9 | Protein DDI1 homolog 2                                               | <i>Ddi2</i>     | 1.1205 | 0.0093 |
| 335 | Q9D2N9 | Vacuolar protein sorting-associated protein 33A                      | <i>Vps33a</i>   | 1.1205 | 0.0093 |
| 336 | Q8BGF9 | Solute carrier family 25 member 44                                   | <i>Slc25a44</i> | 1.1204 | 0.0093 |
| 337 | P53798 | Squalene synthase                                                    | <i>Fdft1</i>    | 1.1154 | 0.0094 |
| 338 | Q8BM65 | Neuronal tyrosine-phosphorylated phosphoinositide-3-kinase adapter 2 | <i>Nyap2</i>    | 1.1146 | 0.0095 |
| 339 | Q8R138 | Transmembrane protein 119                                            | <i>Tmem119</i>  | 1.1146 | 0.0095 |
| 340 | Q505D9 | Tripartite motif-containing protein 67                               | <i>Trim67</i>   | 1.1146 | 0.0095 |
| 341 | Q3UYC0 | Protein phosphatase 1H                                               | <i>Ppm1h</i>    | 1.1128 | 0.0095 |
| 342 | Q8BLQ9 | Cell adhesion molecule 2                                             | <i>Cadm2</i>    | 1.1127 | 0.0095 |
| 343 | A2A690 | Protein TANC2                                                        | <i>Tanc2</i>    | 1.1124 | 0.0095 |
| 344 | P22723 | Gamma-aminobutyric acid receptor subunit gamma-2                     | <i>Gabrg2</i>   | 1.1115 | 0.0095 |
| 345 | P54763 | Ephrin type-B receptor 2                                             | <i>Ephb2</i>    | 1.1087 | 0.0096 |
| 346 | Q8VEE1 | LIM and cysteine-rich domains protein 1                              | <i>Lmcd1</i>    | 1.1085 | 0.0096 |
| 347 | P70298 | Homeobox protein cut-like 2                                          | <i>Cux2</i>     | 1.1075 | 0.0096 |
| 348 | Q6PIE5 | Sodium/potassium-transporting ATPase subunit alpha-2                 | <i>Atp1a2</i>   | 1.1053 | 0.0099 |
| 349 | Q8BX10 | Serine/threonine-protein phosphatase PGAM5 mitochondrial             | <i>Pgam5</i>    | 1.1020 | 0.0100 |
| 350 | Q3UH93 | Plexin-D1                                                            | <i>Plxnd1</i>   | 1.1005 | 0.0101 |
| 351 | P56695 | Wolframin                                                            | <i>Wfs1</i>     | 1.0978 | 0.0102 |
| 352 | Q61191 | Host cell factor 1                                                   | <i>Hcfc1</i>    | 1.0976 | 0.0102 |
| 353 | Q8BGZ1 | Hippocalcin-like protein 4                                           | <i>Hpcal4</i>   | 1.0967 | 0.0102 |
| 354 | P62812 | Gamma-aminobutyric acid receptor subunit alpha-1                     | <i>Gabra1</i>   | 1.0954 | 0.0102 |
| 355 | Q91VR5 | ATP-dependent RNA helicase DDX1                                      | <i>Ddx1</i>     | 1.0947 | 0.0102 |
| 356 | Q64487 | Receptor-type tyrosine-protein phosphatase delta                     | <i>Ptprd</i>    | 1.0916 | 0.0103 |
| 357 | Q60598 | Src substrate cortactin                                              | <i>Cttn</i>     | 1.0876 | 0.0104 |
| 358 | O08784 | Treacle protein                                                      | <i>Tcof1</i>    | 1.0862 | 0.0105 |
| 359 | O08532 | Voltage-dependent calcium channel subunit alpha-2/delta-1            | <i>Cacna2d1</i> | 1.0835 | 0.0105 |
| 360 | Q8VDL4 | ADP-dependent glucokinase                                            | <i>Adpgk</i>    | 1.0812 | 0.0107 |
| 361 | O89001 | Carboxypeptidase D                                                   | <i>Cpd</i>      | 1.0798 | 0.0107 |
| 362 | Q3TCH7 | Cullin-4A                                                            | <i>Cul4a</i>    | 1.0798 | 0.0107 |
| 363 | Q9QUI0 | Transforming protein RhoA                                            | <i>Rhoa</i>     | 1.0705 | 0.0121 |
| 364 | Q91VL8 | Telomeric repeat-binding factor 2-interacting protein 1              | <i>Terf2ip</i>  | 1.0665 | 0.0123 |
| 365 | Q6P6J9 | Thioredoxin domain-containing protein 15                             | <i>Txndc15</i>  | 1.0665 | 0.0123 |
| 366 | Q811C2 | Cysteine protease ATG4C                                              | <i>Atg4c</i>    | 1.0665 | 0.0123 |
| 367 | Q7TST3 | Sterile alpha motif domain-containing protein 10                     | <i>Samd10</i>   | 1.0665 | 0.0123 |
| 368 | Q8VDP2 | STING ER exit protein                                                | <i>Steep1</i>   | 1.0665 | 0.0123 |
| 369 | D3Z4I3 | RNA-binding protein 24                                               | <i>Rbm24</i>    | 1.0665 | 0.0123 |
| 370 | Q62176 | RNA-binding protein 38                                               | <i>Rbm38</i>    | 1.0665 | 0.0123 |
| 371 | Q8BXL7 | ADP-ribosylation factor-related protein 1                            | <i>Arfrp1</i>   | 1.0665 | 0.0123 |
| 372 | Q9Z1B5 | Mitotic spindle assembly checkpoint protein MAD2A                    | <i>Mad2l1</i>   | 1.0665 | 0.0123 |
| 373 | Q9JIL5 | Tubby-related protein 4                                              | <i>Tulp4</i>    | 1.0665 | 0.0123 |
| 374 | Q9DCI3 | STARD3 N-terminal-like protein                                       | <i>Stard3nl</i> | 1.0665 | 0.0123 |
| 375 | A2AQ19 | RNA polymerase-associated protein RTF1 homolog                       | <i>Rtf1</i>     | 1.0665 | 0.0123 |
| 376 | Q60949 | TBC1 domain family member 1                                          | <i>Tbc1d1</i>   | 1.0665 | 0.0123 |



|     |        |                                                                    |                  |        |        |
|-----|--------|--------------------------------------------------------------------|------------------|--------|--------|
| 377 | Q9ER41 | Torsin-1B                                                          | <i>Tor1b</i>     | 1.0665 | 0.0123 |
| 378 | Q9R171 | Cerebellin-1                                                       | <i>Cbln1</i>     | 1.0665 | 0.0123 |
| 379 | Q8BGU2 | Cerebellin-2                                                       | <i>Cbln2</i>     | 1.0665 | 0.0123 |
| 380 | Q9CWU4 | UPF0690 protein C1orf52 homolog                                    |                  | 1.0665 | 0.0123 |
| 381 | O70281 | Protein-tyrosine sulfotransferase 1                                | <i>Tpst1</i>     | 1.0665 | 0.0123 |
| 382 | Q6A051 | Attractin-like protein 1                                           | <i>Atrnl1</i>    | 1.0665 | 0.0123 |
| 383 | P35822 | Receptor-type tyrosine-protein phosphatase kappa                   | <i>Ptprk</i>     | 1.0665 | 0.0123 |
| 384 | Q8VI93 | 2'-5'-oligoadenylate synthase 3                                    | <i>Oas3</i>      | 1.0665 | 0.0123 |
| 385 | P13745 | Glutathione S-transferase A1                                       | <i>Gsta1</i>     | 1.0651 | 0.0124 |
| 386 | P46097 | Synaptotagmin-2                                                    | <i>Syt2</i>      | 1.0648 | 0.0124 |
| 387 | Q9D4V0 | Ethanolamine kinase 1                                              | <i>Etnk1</i>     | 1.0646 | 0.0124 |
| 388 | P62257 | Ubiquitin-conjugating enzyme E2 H                                  | <i>Ube2h</i>     | 1.0646 | 0.0124 |
| 389 | Q8BKCS | Importin-5                                                         | <i>Ipo5</i>      | 1.0646 | 0.0124 |
| 390 | Q62383 | Transcription elongation factor SPT6                               | <i>Supt6h</i>    | 1.0619 | 0.0126 |
| 391 | P40336 | Vacuolar protein sorting-associated protein 26A                    | <i>Vps26a</i>    | 1.0609 | 0.0126 |
| 392 | Q9JMG3 | Transmembrane and ubiquitin-like domain-containing protein 1       | <i>Tmub1</i>     | 1.0606 | 0.0126 |
| 393 | P23116 | Eukaryotic translation initiation factor 3 subunit A               | <i>Eif3a</i>     | 1.0604 | 0.0126 |
| 394 | P37804 | Transgelin                                                         | <i>Tagln</i>     | 1.0592 | 0.0127 |
| 395 | Q62188 | Dihydropyrimidinase-related protein 3                              | <i>Dpysl3</i>    | 1.0589 | 0.0127 |
| 396 | Q9D2R0 | Acetoacetyl-CoA synthetase                                         | <i>Aacs</i>      | 1.0581 | 0.0128 |
| 397 | P70205 | Pituitary adenylate cyclase-activating polypeptide type I receptor | <i>Adcyap1r1</i> | 1.0573 | 0.0128 |
| 398 | Q9ERK4 | Exportin-2                                                         | <i>Cse1l</i>     | 1.0566 | 0.0128 |
| 399 | Q68FH0 | Plakophilin-4                                                      | <i>Pkp4</i>      | 1.0553 | 0.0128 |
| 400 | P97797 | Tyrosine-protein phosphatase non-receptor type substrate 1         | <i>Sirpa</i>     | 1.0512 | 0.0130 |
| 401 | Q04899 | Cyclin-dependent kinase 18                                         | <i>Cdk18</i>     | 1.0439 | 0.0134 |
| 402 | Q02819 | Nucleobindin-1                                                     | <i>Nucb1</i>     | 1.0431 | 0.0134 |
| 403 | Q61578 | NADPH:adrenodoxin oxidoreductase mitochondrial                     | <i>Fdxr</i>      | 1.0429 | 0.0134 |
| 404 | Q8CGF7 | Transcription elongation regulator 1                               | <i>Tcerg1</i>    | 1.0428 | 0.0134 |
| 405 | Q8VDN2 | Sodium/potassium-transporting ATPase subunit alpha-1               | <i>Atp1a1</i>    | 1.0406 | 0.0135 |
| 406 | Q8CCT4 | Transcription elongation factor A protein-like 5                   | <i>Tceal5</i>    | 1.0397 | 0.0135 |
| 407 | Q61768 | Kinesin-1 heavy chain                                              | <i>Kif5b</i>     | 1.0395 | 0.0135 |
| 408 | Q6PB44 | Tyrosine-protein phosphatase non-receptor type 23                  | <i>Ptpn23</i>    | 1.0386 | 0.0136 |
| 409 | Q8BUK6 | Protein Hook homolog 3                                             | <i>Hook3</i>     | 1.0360 | 0.0137 |
| 410 | Q9Z321 | DNA topoisomerase 3-beta-1                                         | <i>Top3b</i>     | 1.0354 | 0.0138 |
| 411 | Q64514 | Tripeptidyl-peptidase 2                                            | <i>Tpp2</i>      | 1.0335 | 0.0139 |
| 412 | Q8C996 | Transmembrane protein 163                                          | <i>Tmem163</i>   | 1.0333 | 0.0139 |
| 413 | Q0VBL3 | RNA-binding protein 15                                             | <i>Rbm15</i>     | 1.0330 | 0.0139 |
| 414 | Q99J77 | Sialic acid synthase                                               | <i>Nans</i>      | 1.0319 | 0.0139 |
| 415 | O08810 | 116 kDa U5 small nuclear ribonucleoprotein component               | <i>Eftud2</i>    | 1.0298 | 0.0140 |
| 416 | O88602 | Voltage-dependent calcium channel gamma-2 subunit                  | <i>Cacng2</i>    | 1.0289 | 0.0140 |
| 417 | Q8CCX5 | Keratin-like protein KRT222                                        | <i>Krt222</i>    | 1.0289 | 0.0140 |
| 418 | Q8BQZ4 | Ral GTPase-activating protein subunit beta                         | <i>Ralgapb</i>   | 1.0283 | 0.0140 |
| 419 | Q99LB2 | Dehydrogenase/reductase SDR family member 4                        | <i>Dhrs4</i>     | 1.0278 | 0.0141 |
| 420 | P59823 | Interleukin-1 receptor accessory protein-like 1                    | <i>Il1rapl1</i>  | 1.0245 | 0.0141 |
| 421 | P41778 | Pre-B-cell leukemia transcription factor 1                         | <i>Pbx1</i>      | 1.0245 | 0.0141 |
| 422 | Q62178 | Semaphorin-4A                                                      | <i>Sema4a</i>    | 1.0245 | 0.0141 |
| 423 | Q14BI2 | Metabotropic glutamate receptor 2                                  | <i>Grm2</i>      | 1.0241 | 0.0141 |
| 424 | Q8BYM8 | Probable cysteine-tRNA ligase mitochondrial                        | <i>Cars2</i>     | 1.0222 | 0.0142 |
| 425 | Q3UHE1 | Membrane-associated phosphatidylinositol transfer protein 3        | <i>Pitpnm3</i>   | 1.0222 | 0.0142 |
| 426 | A2AFS3 | Endosome/lysosome-associated apoptosis and autophagy regulator 1   | <i>Elapor1</i>   | 1.0213 | 0.0143 |
| 427 | Q8BTS4 | Nuclear pore complex protein Nup54                                 | <i>Nup54</i>     | 1.0213 | 0.0143 |
| 428 | Q9EQS9 | Immunoglobulin superfamily DCC subclass member 4                   | <i>Igdcc4</i>    | 1.0213 | 0.0143 |
| 429 | Q8VDI7 | Ubiquitin-associated domain-containing protein 1                   | <i>Ubac1</i>     | 1.0213 | 0.0143 |
| 430 | Q61923 | Potassium voltage-gated channel subfamily A member 6               | <i>Kcna6</i>     | 1.0173 | 0.0145 |
| 431 | Q616G8 | E3 ubiquitin-protein ligase HECW2                                  | <i>Hecw2</i>     | 1.0173 | 0.0145 |
| 432 | Q61189 | Methylosome subunit pCln                                           | <i>Clns1a</i>    | 1.0173 | 0.0145 |
| 433 | Q9D394 | Protein RUFY3                                                      | <i>Rufy3</i>     | 1.0169 | 0.0145 |
| 434 | Q9D6Z1 | Nucleolar protein 56                                               | <i>Nop56</i>     | 1.0153 | 0.0145 |
| 435 | Q9EPE9 | Endoplasmic reticulum transmembrane helix translocase              | <i>Atp13a1</i>   | 1.0138 | 0.0146 |
| 436 | Q8R3V5 | Endophilin-B2                                                      | <i>Sh3glb2</i>   | 1.0097 | 0.0148 |
| 437 | B2RY56 | RNA-binding protein 25                                             | <i>Rbm25</i>     | 1.0077 | 0.0148 |
| 438 | Q8BGZ4 | Cell division cycle protein 23 homolog                             | <i>Cdc23</i>     | 1.0044 | 0.0150 |
| 439 | P07903 | DNA excision repair protein ERCC-1                                 | <i>Ercc1</i>     | 1.0044 | 0.0150 |

|     |        |                                                                     |                 |        |        |
|-----|--------|---------------------------------------------------------------------|-----------------|--------|--------|
| 440 | Q9QYS9 | Protein quaking                                                     | <i>Qki</i>      | 1.0041 | 0.0150 |
| 441 | Q8C854 | Myelin expression factor 2                                          | <i>Myef2</i>    | 1.0012 | 0.0152 |
| 442 | Q8R0I4 | TM2 domain-containing protein 2                                     | <i>Tm2d2</i>    | 0.9995 | 0.0152 |
| 443 | Q9EPW0 | Inositol polyphosphate-4-phosphatase type I A                       | <i>Inpp4a</i>   | 0.9991 | 0.0153 |
| 444 | Q811D0 | Disks large homolog 1                                               | <i>Dlg1</i>     | 0.9974 | 0.0153 |
| 445 | Q99NB8 | Ubiquilin-4                                                         | <i>Ubqln4</i>   | 0.9969 | 0.0153 |
| 446 | Q91WG4 | Elongator complex protein 2                                         | <i>Elp2</i>     | 0.9964 | 0.0153 |
| 447 | P47857 | ATP-dependent 6-phosphofructokinase muscle type                     | <i>Pfkm</i>     | 0.9948 | 0.0154 |
| 448 | Q8C729 | Protein FAM126B                                                     | <i>Fam126b</i>  | 0.9943 | 0.0154 |
| 449 | Q06335 | Amyloid-like protein 2                                              | <i>Ap1p2</i>    | 0.9940 | 0.0154 |
| 450 | O08672 | Kinesin-like protein KIFC2                                          | <i>Kifc2</i>    | 0.9940 | 0.0154 |
| 451 | Q55UE8 | Ankyrin repeat domain-containing protein 40                         | <i>Ankrd40</i>  | 0.9940 | 0.0154 |
| 452 | Q811S7 | Upstream-binding protein 1                                          | <i>Ubp1</i>     | 0.9940 | 0.0154 |
| 453 | Q8BZB2 | Phosphopantothenoylcysteine decarboxylase                           | <i>Ppcdc</i>    | 0.9940 | 0.0154 |
| 454 | Q0VGB7 | Serine/threonine-protein phosphatase 4 regulatory subunit 2         | <i>Ppp4r2</i>   | 0.9940 | 0.0154 |
| 455 | O35075 | Vacuolar protein sorting-associated protein 26C                     | <i>Vps26c</i>   | 0.9940 | 0.0154 |
| 456 | Q3UN02 | Lysocardiolipin acyltransferase 1                                   | <i>Lclat1</i>   | 0.9940 | 0.0154 |
| 457 | Q55WP3 | NAC-alpha domain-containing protein 1                               | <i>Nacad</i>    | 0.9940 | 0.0154 |
| 458 | P97298 | Pigment epithelium-derived factor                                   | <i>Serpinf1</i> | 0.9940 | 0.0154 |
| 459 | Q6PB93 | Polypeptide N-acetylgalactosaminyltransferase 2                     | <i>Galnt2</i>   | 0.9940 | 0.0154 |
| 460 | Q640M6 | Glycerophosphodiester phosphodiesterase domain-containing protein 5 | <i>Gdpd5</i>    | 0.9940 | 0.0154 |
| 461 | Q9DBX6 | Cytochrome P450 2S1                                                 | <i>Cyp2s1</i>   | 0.9940 | 0.0154 |
| 462 | O35607 | Bone morphogenetic protein receptor type-2                          | <i>Bmpr2</i>    | 0.9940 | 0.0154 |
| 463 | O35166 | Golgi SNAP receptor complex member 2                                | <i>Gosr2</i>    | 0.9940 | 0.0154 |
| 464 | Q9DAI6 | Protein FAM135B                                                     | <i>Fam135b</i>  | 0.9940 | 0.0154 |
| 465 | Q9ERS5 | Pleckstrin homology domain-containing family A member 2             | <i>Plekha2</i>  | 0.9940 | 0.0154 |
| 466 | Q8BP22 | Protein FAM92A                                                      | <i>Fam92a</i>   | 0.9940 | 0.0154 |
| 467 | O54836 | Zinc finger matrin-type protein 3                                   | <i>Zmat3</i>    | 0.9940 | 0.0154 |
| 468 | Q99MI9 | ATP-dependent RNA helicase DDX50                                    | <i>Ddx50</i>    | 0.9940 | 0.0154 |
| 469 | Q9D968 | Host cell factor 2                                                  | <i>Hcfc2</i>    | 0.9940 | 0.0154 |
| 470 | Q8VE85 | PRELI domain containing protein 3A                                  | <i>Prelid3a</i> | 0.9940 | 0.0154 |
| 471 | O35417 | Proenkephalin-B                                                     | <i>Pdyn</i>     | 0.9940 | 0.0154 |
| 472 | Q99MD9 | Nuclear autoantigenic sperm protein                                 | <i>Nasp</i>     | 0.9940 | 0.0154 |
| 473 | Q9EQB9 | Zinc finger protein 287                                             | <i>Znf287</i>   | 0.9940 | 0.0154 |
| 474 | P08074 | Carbonyl reductase [NADPH] 2                                        | <i>Cbr2</i>     | 0.9940 | 0.0154 |
| 475 | P97300 | Neuroplastin                                                        | <i>Nptn</i>     | 0.9917 | 0.0155 |
| 476 | Q8BG81 | Polymerase delta-interacting protein 3                              | <i>Poldip3</i>  | 0.9911 | 0.0157 |
| 477 | Q5SSL4 | Active breakpoint cluster region-related protein                    | <i>Abr</i>      | 0.9847 | 0.0174 |
| 478 | Q7M6Z0 | Reticulon-4 receptor-like 2                                         | <i>Rtn4rl2</i>  | 0.9846 | 0.0174 |
| 479 | Q9ER72 | Cysteine--tRNA ligase cytoplasmic                                   | <i>Cars1</i>    | 0.9837 | 0.0177 |
| 480 | O70591 | Prefoldin subunit 2                                                 | <i>Pfdn2</i>    | 0.9836 | 0.0177 |
| 481 | Q8JZR0 | Long-chain-fatty-acid--CoA ligase 5                                 | <i>Acs15</i>    | 0.9818 | 0.0177 |
| 482 | Q8JZR6 | Electroneutral sodium bicarbonate exchanger 1                       | <i>Slc4a8</i>   | 0.9807 | 0.0178 |
| 483 | P70257 | Nuclear factor 1 X-type                                             | <i>Nfix</i>     | 0.9803 | 0.0178 |
| 484 | P70271 | PDZ and LIM domain protein 4                                        | <i>Pdlim4</i>   | 0.9803 | 0.0178 |
| 485 | Q8VHQ9 | Acyl-coenzyme A thioesterase 11                                     | <i>Acot11</i>   | 0.9777 | 0.0180 |
| 486 | O88532 | Zinc finger RNA-binding protein                                     | <i>Zfr</i>      | 0.9773 | 0.0182 |
| 487 | Q9WVH9 | Fibulin-5                                                           | <i>Fbln5</i>    | 0.9753 | 0.0183 |
| 488 | Q9ERL9 | Guanylate cyclase soluble subunit alpha-1                           | <i>Gucy1a1</i>  | 0.9753 | 0.0183 |
| 489 | Q4KMM3 | Oxidation resistance protein 1                                      | <i>Oxr1</i>     | 0.9690 | 0.0187 |
| 490 | Q6P4T2 | U5 small nuclear ribonucleoprotein 200 kDa helicase                 | <i>Snrnp200</i> | 0.9686 | 0.0187 |
| 491 | Q8CHS8 | Vacuolar protein sorting-associated protein 37A                     | <i>Vps37a</i>   | 0.9681 | 0.0187 |
| 492 | Q6NSW3 | A-kinase anchor protein SPHKAP                                      | <i>Sphkap</i>   | 0.9664 | 0.0188 |
| 493 | Q3TPX4 | Exocyst complex component 5                                         | <i>Exoc5</i>    | 0.9659 | 0.0188 |
| 494 | Q9JJ43 | RNA binding protein fox-1 homolog 1                                 | <i>Rbfox1</i>   | 0.9618 | 0.0190 |
| 495 | P06537 | Glucocorticoid receptor                                             | <i>Nr3c1</i>    | 0.9611 | 0.0190 |
| 496 | Q8BIE6 | FERM domain-containing protein 4A                                   | <i>Frm4a</i>    | 0.9611 | 0.0190 |
| 497 | Q8BHK1 | Magnesium transporter NIPA1                                         | <i>Nipa1</i>    | 0.9611 | 0.0190 |
| 498 | Q9Z2V5 | Histone deacetylase 6                                               | <i>Hdac6</i>    | 0.9598 | 0.0192 |
| 499 | Q99K28 | ADP-ribosylation factor GTPase-activating protein 2                 | <i>Arfgap2</i>  | 0.9598 | 0.0192 |
| 500 | Q9Z2D3 | Gasdermin-E                                                         | <i>Gsdme</i>    | 0.9589 | 0.0192 |
| 501 | Q8C4Y3 | Negative elongation factor B                                        | <i>Nelfb</i>    | 0.9582 | 0.0194 |
| 502 | O70318 | Band 4.1-like protein 2                                             | <i>Epb41l2</i>  | 0.9578 | 0.0194 |

|     |        |                                                                            |                  |        |        |
|-----|--------|----------------------------------------------------------------------------|------------------|--------|--------|
| 503 | Q61739 | Integrin alpha-6                                                           | <i>Itga6</i>     | 0.9575 | 0.0194 |
| 504 | Q9Z275 | Retinaldehyde-binding protein 1                                            | <i>Rlbp1</i>     | 0.9550 | 0.0197 |
| 505 | Q6PGC1 | ATP-dependent RNA helicase DHX29                                           | <i>Dhx29</i>     | 0.9550 | 0.0197 |
| 506 | P20029 | Endoplasmic reticulum chaperone BiP                                        | <i>Hspa5</i>     | 0.9546 | 0.0198 |
| 507 | Q6NXX7 | Inactive dipeptidyl peptidase 10                                           | <i>Dpp10</i>     | 0.9533 | 0.0198 |
| 508 | Q99JR1 | Sideroflexin-1                                                             | <i>Sfxn1</i>     | 0.9533 | 0.0198 |
| 509 | Q9D154 | Leukocyte elastase inhibitor A                                             | <i>Serpinb1a</i> | 0.9518 | 0.0199 |
| 510 | P70392 | Ras-specific guanine nucleotide-releasing factor 2                         | <i>Rasgrf2</i>   | 0.9504 | 0.0200 |
| 511 | Q9CPU4 | Microsomal glutathione S-transferase 3                                     | <i>Mgst3</i>     | 0.9504 | 0.0200 |
| 512 | Q8BZF8 | Phosphoglucomutase-like protein 5                                          | <i>Pgm5</i>      | 0.9463 | 0.0205 |
| 513 | P35980 | 60S ribosomal protein L18                                                  | <i>Rpl18</i>     | 0.9455 | 0.0206 |
| 514 | Q8BLK9 | Ribosomal protein S6 kinase delta-1                                        | <i>Rps6kc1</i>   | 0.9452 | 0.0206 |
| 515 | Q9D0Q7 | 39S ribosomal protein L45 mitochondrial                                    | <i>Mrpl45</i>    | 0.9437 | 0.0206 |
| 516 | Q5DTY9 | BTB/POZ domain-containing protein KCTD16                                   | <i>Kctd16</i>    | 0.9396 | 0.0208 |
| 517 | Q8BNU0 | Armadillo repeat-containing protein 6                                      | <i>Armc6</i>     | 0.9387 | 0.0208 |
| 518 | Q9WTS5 | Teneurin-2                                                                 | <i>Tenm2</i>     | 0.9384 | 0.0211 |
| 519 | Q9CR26 | Vacuolar protein sorting-associated protein VTA1 homolog                   | <i>Vta1</i>      | 0.9372 | 0.0211 |
| 520 | Q61481 | Calcium/calmodulin-dependent 3' 5'-cyclic nucleotide phosphodiesterase 1A  | <i>Pde1a</i>     | 0.9369 | 0.0211 |
| 521 | P16627 | Heat shock 70 kDa protein 1-like                                           | <i>Hspa1l</i>    | 0.9360 | 0.0212 |
| 522 | Q8BHS3 | Pre-mRNA-splicing factor RBM22                                             | <i>Rbm22</i>     | 0.9341 | 0.0214 |
| 523 | Q64467 | Glyceraldehyde-3-phosphate dehydrogenase testis-specific                   | <i>Gapdhs</i>    | 0.9336 | 0.0214 |
| 524 | A2AT37 | Regulator of nonsense transcripts 2                                        | <i>Upf2</i>      | 0.9332 | 0.0214 |
| 525 | Q8C419 | Probable G-protein coupled receptor 158                                    | <i>Gpr158</i>    | 0.9285 | 0.0217 |
| 526 | Q6P456 | Serine/threonine-protein kinase SIK3                                       | <i>Sik3</i>      | 0.9276 | 0.0218 |
| 527 | P12367 | cAMP-dependent protein kinase type II-alpha regulatory subunit             | <i>Prkar2a</i>   | 0.9271 | 0.0218 |
| 528 | Q80U56 | Late secretory pathway protein AVL9 homolog                                | <i>Avl9</i>      | 0.9270 | 0.0219 |
| 529 | Q9EPU0 | Regulator of nonsense transcripts 1                                        | <i>Upf1</i>      | 0.9258 | 0.0219 |
| 530 | Q62083 | PRKCA-binding protein                                                      | <i>Pick1</i>     | 0.9243 | 0.0220 |
| 531 | Q9Z2H2 | Regulator of G-protein signaling 6                                         | <i>Rgs6</i>      | 0.9238 | 0.0220 |
| 532 | Q78ZA7 | Nucleosome assembly protein 1-like 4                                       | <i>Nap1l4</i>    | 0.9202 | 0.0223 |
| 533 | Q91YD3 | mRNA-decapping enzyme 1A                                                   | <i>Dcp1a</i>     | 0.9196 | 0.0223 |
| 534 | Q8VDP3 | [F-actin]-monooxygenase MICAL1                                             | <i>Mical1</i>    | 0.9170 | 0.0226 |
| 535 | P60191 | Regulating synaptic membrane exocytosis protein 4                          | <i>Rims4</i>     | 0.9170 | 0.0226 |
| 536 | Q9D8P4 | 39S ribosomal protein L17 mitochondrial                                    | <i>Mrpl17</i>    | 0.9170 | 0.0226 |
| 537 | E9Q9D5 | Rab-like protein 2A                                                        | <i>Rabl2</i>     | 0.9170 | 0.0226 |
| 538 | P50516 | V-type proton ATPase catalytic subunit A                                   | <i>Atp6v1a</i>   | 0.9166 | 0.0226 |
| 539 | P61460 | GATOR complex protein DEPDC5                                               | <i>Depdc5</i>    | 0.9165 | 0.0226 |
| 540 | Q8C015 | Serine/threonine-protein kinase PAK 5                                      | <i>Pak5</i>      | 0.9155 | 0.0226 |
| 541 | Q810B6 | Rabankyrin-5                                                               | <i>Ankfy1</i>    | 0.9152 | 0.0226 |
| 542 | P12023 | Amyloid-beta A4 protein                                                    | <i>App</i>       | 0.9103 | 0.0229 |
| 543 | Q9CXW4 | 60S ribosomal protein L11                                                  | <i>Rpl11</i>     | 0.9095 | 0.0229 |
| 544 | Q8JZW5 | SH2 domain-containing protein 5                                            | <i>Sh2d5</i>     | 0.9082 | 0.0232 |
| 545 | Q9D2N4 | Dystrobrevin alpha                                                         | <i>Dtna</i>      | 0.9082 | 0.0232 |
| 546 | P41241 | Tyrosine-protein kinase CSK                                                | <i>Csk</i>       | 0.9082 | 0.0232 |
| 547 | A2ARP1 | Inositol hexakisphosphate and diphosphoinositol-pentakisphosphate kinase 1 | <i>Ppip5k1</i>   | 0.9081 | 0.0232 |
| 548 | Q6TEK5 | Vitamin K epoxide reductase complex subunit 1-like protein 1               | <i>Vkorc1l1</i>  | 0.9075 | 0.0232 |
| 549 | Q91XU0 | ATPase WRNIP1                                                              | <i>Wrnip1</i>    | 0.9061 | 0.0234 |
| 550 | P61620 | Protein transport protein Sec61 subunit alpha isoform 1                    | <i>Sec61a1</i>   | 0.9035 | 0.0237 |
| 551 | Q9D8W5 | 26S proteasome non-ATPase regulatory subunit 12                            | <i>Psmc12</i>    | 0.9016 | 0.0239 |
| 552 | Q61315 | Adenomatous polyposis coli protein                                         | <i>Apc</i>       | 0.9016 | 0.0239 |
| 553 | Q60780 | Growth arrest-specific protein 7                                           | <i>Gas7</i>      | 0.8982 | 0.0244 |
| 554 | P26041 | Moesin                                                                     | <i>Msn</i>       | 0.8963 | 0.0246 |
| 555 | Q9DBG9 | Tax1-binding protein 3                                                     | <i>Tax1bp3</i>   | 0.8959 | 0.0246 |
| 556 | Q4ZJN1 | Complement C1q and tumor necrosis factor-related protein 9                 | <i>C1qtnf9</i>   | 0.8954 | 0.0246 |
| 557 | Q9Z0S1 | 3'(2') 5'-biphosphate nucleotidase 1                                       | <i>Bpnt1</i>     | 0.8951 | 0.0246 |
| 558 | Q3UH60 | Disco-interacting protein 2 homolog B                                      | <i>Dip2b</i>     | 0.8943 | 0.0246 |
| 559 | Q9EQH3 | Vacuolar protein sorting-associated protein 35                             | <i>Vps35</i>     | 0.8920 | 0.0260 |
| 560 | P35235 | Tyrosine-protein phosphatase non-receptor type 11                          | <i>Ptpn11</i>    | 0.8918 | 0.0260 |
| 561 | Q8BHL3 | TBC1 domain family member 10B                                              | <i>Tbc1d10b</i>  | 0.8908 | 0.0263 |
| 562 | O88487 | Cytoplasmic dynein 1 intermediate chain 2                                  | <i>Dync1i2</i>   | 0.8895 | 0.0265 |
| 563 | Q3TCJ1 | BRISC complex subunit Abraxas 2                                            | <i>Abraxas2</i>  | 0.8894 | 0.0265 |
| 564 | Q9JMB8 | Contactin-6                                                                | <i>Cntn6</i>     | 0.8894 | 0.0265 |
| 565 | Q99LR1 | Lysophosphatidylserine lipase ABHD12                                       | <i>Abhd12</i>    | 0.8891 | 0.0265 |

|     |        |                                                                           |                |        |        |
|-----|--------|---------------------------------------------------------------------------|----------------|--------|--------|
| 566 | Q61699 | Heat shock protein 105 kDa                                                | <i>Hsph1</i>   | 0.8884 | 0.0265 |
| 567 | Q8BIJ7 | RUN and FYVE domain-containing protein 1                                  | <i>Rufy1</i>   | 0.8880 | 0.0265 |
| 568 | Q9DAW6 | U4/U6 small nuclear ribonucleoprotein Prp4                                | <i>Prpf4</i>   | 0.8880 | 0.0265 |
| 569 | Q8BIF2 | RNA binding protein fox-1 homolog 3                                       | <i>Rbfox3</i>  | 0.8869 | 0.0266 |
| 570 | Q8C7R4 | Ubiquitin-like modifier-activating enzyme 6                               | <i>Uba6</i>    | 0.8848 | 0.0272 |
| 571 | Q91Z31 | Polypyrimidine tract-binding protein 2                                    | <i>Ptbp2</i>   | 0.8818 | 0.0274 |
| 572 | Q4ACU6 | SH3 and multiple ankyrin repeat domains protein 3                         | <i>Shank3</i>  | 0.8795 | 0.0275 |
| 573 | Q9QXG2 | Rab proteins geranylgeranyltransferase component A 1                      | <i>Chm</i>     | 0.8778 | 0.0276 |
| 574 | Q8R574 | Phosphoribosyl pyrophosphate synthase-associated protein 2                | <i>Prpsap2</i> | 0.8759 | 0.0277 |
| 575 | Q9WTR1 | Transient receptor potential cation channel subfamily V member 2          | <i>Trpv2</i>   | 0.8756 | 0.0277 |
| 576 | Q8CH09 | SURP and G-patch domain-containing protein 2                              | <i>Sugp2</i>   | 0.8743 | 0.0277 |
| 577 | Q60629 | Ephrin type-A receptor 5                                                  | <i>Epha5</i>   | 0.8736 | 0.0278 |
| 578 | Q9DBG7 | Signal recognition particle receptor subunit alpha                        | <i>Srpra</i>   | 0.8725 | 0.0279 |
| 579 | Q9R226 | KH domain-containing RNA-binding signal transduction-associated protein 3 | <i>Khdrbs3</i> | 0.8719 | 0.0279 |
| 580 | Q5F2E7 | Nuclear fragile X mental retardation-interacting protein 2                | <i>Nufip2</i>  | 0.8709 | 0.0280 |
| 581 | Q9JHU9 | Inositol-3-phosphate synthase 1                                           | <i>Isyna1</i>  | 0.8700 | 0.0280 |
| 582 | Q9QXJ1 | Amyloid-beta A4 precursor protein-binding family B member 1               | <i>Apbb1</i>   | 0.8680 | 0.0281 |
| 583 | Q91V92 | ATP-citrate synthase                                                      | <i>Acly</i>    | 0.8666 | 0.0282 |
| 584 | P68181 | cAMP-dependent protein kinase catalytic subunit beta                      | <i>Prkacb</i>  | 0.8666 | 0.0282 |
| 585 | Q0KLO2 | Triple functional domain protein                                          | <i>Trio</i>    | 0.8657 | 0.0283 |
| 586 | Q61490 | CD166 antigen                                                             | <i>Alcam</i>   | 0.8644 | 0.0284 |
| 587 | Q99J39 | Malonyl-CoA decarboxylase mitochondrial                                   | <i>Mlycd</i>   | 0.8643 | 0.0285 |
| 588 | Q9JJZ4 | Ubiquitin-conjugating enzyme E2 J1                                        | <i>Ube2j1</i>  | 0.8640 | 0.0285 |
| 589 | Q6ZPU9 | KIF-binding protein                                                       | <i>Kifbp</i>   | 0.8640 | 0.0285 |
| 590 | Q5U4F6 | Cytoplasmic dynein 2 intermediate chain 2                                 | <i>Dync2i2</i> | 0.8639 | 0.0286 |
| 591 | P63137 | Gamma-aminobutyric acid receptor subunit beta-2                           | <i>Gabrb2</i>  | 0.8632 | 0.0286 |
| 592 | A2AQP0 | Myosin-7B                                                                 | <i>Myh7b</i>   | 0.8628 | 0.0287 |
| 593 | Q6NS60 | F-box only protein 41                                                     | <i>Fbxo41</i>  | 0.8603 | 0.0288 |
| 594 | Q3UDE2 | Tubulin--tyrosine ligase-like protein 12                                  | <i>Ttl12</i>   | 0.8592 | 0.0288 |
| 595 | Q9Z2H5 | Band 4.1-like protein 1                                                   | <i>Epb41l1</i> | 0.8566 | 0.0292 |
| 596 | O89029 | Matrilin-4                                                                | <i>Matn4</i>   | 0.8556 | 0.0293 |
| 597 | Q8VE73 | Cullin-7                                                                  | <i>Cul7</i>    | 0.8547 | 0.0293 |
| 598 | E9Q3L2 | Phosphatidylinositol 4-kinase alpha                                       | <i>Pi4ka</i>   | 0.8547 | 0.0293 |
| 599 | Q8BWZ3 | N-alpha-acetyltransferase 25 NatB auxiliary subunit                       | <i>Naa25</i>   | 0.8527 | 0.0295 |
| 600 | P08003 | Protein disulfide-isomerase A4                                            | <i>Pdia4</i>   | 0.8504 | 0.0298 |

Supplementary Table 4.

| Number | Accession | Protein Name                                                           | Gene Name      | PLGEM-STN | p Value |
|--------|-----------|------------------------------------------------------------------------|----------------|-----------|---------|
| 1      | P60202    | Myelin proteolipid protein                                             | <i>Plp1</i>    | -11.2113  | 0.0000  |
| 2      | Q9CWF2    | Tubulin beta-2B chain                                                  | <i>Tubb2b</i>  | -8.3793   | 0.0000  |
| 3      | Q7TMM9    | Tubulin beta-2A chain                                                  | <i>Tubb2a</i>  | -8.1485   | 0.0000  |
| 4      | P68372    | Tubulin beta-4B chain                                                  | <i>Tubb4b</i>  | -7.0781   | 0.0000  |
| 5      | P99024    | Tubulin beta-5 chain                                                   | <i>Tubb5</i>   | -6.3516   | 0.0000  |
| 6      | Q9D6F9    | Tubulin beta-4A chain                                                  | <i>Tubb4a</i>  | -6.2305   | 0.0000  |
| 7      | Q922F4    | Tubulin beta-6 chain                                                   | <i>Tubb6</i>   | -4.6802   | 0.0001  |
| 8      | Q0VE82    | Copine-7                                                               | <i>Cpne7</i>   | -4.5807   | 0.0001  |
| 9      | P16330    | 2' 3'-cyclic-nucleotide 3'-phosphodiesterase                           | <i>Cnp</i>     | -4.3320   | 0.0001  |
| 10     | P10649    | Glutathione S-transferase Mu 1                                         | <i>Gstm1</i>   | -4.3084   | 0.0001  |
| 11     | P63158    | High mobility group protein B1                                         | <i>Hmgb1</i>   | -4.2832   | 0.0001  |
| 12     | Q9Z140    | Copine-6                                                               | <i>Cpne6</i>   | -4.2237   | 0.0001  |
| 13     | P04370    | Myelin basic protein                                                   | <i>Mbp</i>     | -4.0933   | 0.0001  |
| 14     | O54983    | Ketimine reductase mu-crystallin                                       | <i>Crym</i>    | -3.9207   | 0.0001  |
| 15     | P01869    | Ig gamma-1 chain C region membrane-bound form                          | <i>Ighg1</i>   | -3.6882   | 0.0001  |
| 16     | E9PV24    | Fibrinogen alpha chain                                                 | <i>Fga</i>     | -3.6449   | 0.0001  |
| 17     | Q9DB05    | Alpha-soluble NSF attachment protein                                   | <i>Napa</i>    | -3.6091   | 0.0001  |
| 18     | P01868    | Ig gamma-1 chain C region secreted form                                | <i>Ighg1</i>   | -3.5617   | 0.0001  |
| 19     | Q80XN0    | D-beta-hydroxybutyrate dehydrogenase mitochondrial                     | <i>Bdh1</i>    | -3.3187   | 0.0002  |
| 20     | P11798    | Calcium/calmodulin-dependent protein kinase type II subunit alpha      | <i>Camk2a</i>  | -3.2023   | 0.0002  |
| 21     | Q61885    | Myelin-oligodendrocyte glycoprotein                                    | <i>Mag</i>     | -3.1555   | 0.0002  |
| 22     | P12246    | Serum amyloid P-component                                              | <i>Apcs</i>    | -3.1367   | 0.0002  |
| 23     | Q9QVP9    | Protein-tyrosine kinase 2-beta                                         | <i>Ptk2b</i>   | -3.1031   | 0.0002  |
| 24     | B1AQJ2    | Ubiquitin carboxyl-terminal hydrolase 36                               | <i>Usp36</i>   | -3.0336   | 0.0002  |
| 25     | Q9Z0E0    | Neurochondrin                                                          | <i>Ncdn</i>    | -2.9705   | 0.0002  |
| 26     | P01027    | Complement C3                                                          | <i>C3</i>      | -2.8866   | 0.0002  |
| 27     | Q9EQK5    | Major vault protein                                                    | <i>Mvp</i>     | -2.8693   | 0.0002  |
| 28     | P59108    | Copine-2                                                               | <i>Cpne2</i>   | -2.8595   | 0.0003  |
| 29     | P05784    | Keratin type I cytoskeletal 18                                         | <i>Krt18</i>   | -2.8437   | 0.0003  |
| 30     | Q0VBF8    | Protein stum homolog                                                   | <i>Stum</i>    | -2.7978   | 0.0003  |
| 31     | Q9D379    | Epoxide hydrolase 1                                                    | <i>Ephx1</i>   | -2.7954   | 0.0003  |
| 32     | Q9R0Q6    | Actin-related protein 2/3 complex subunit 1A                           | <i>Arpc1a</i>  | -2.7468   | 0.0003  |
| 33     | Q4FZF3    | Probable ATP-dependent RNA helicase DDX49                              | <i>Ddx49</i>   | -2.6957   | 0.0003  |
| 34     | Q9JJH1    | Ribonuclease 4                                                         | <i>Rnase4</i>  | -2.6892   | 0.0003  |
| 35     | P00405    | Cytochrome c oxidase subunit 2                                         | <i>Mtco2</i>   | -2.6539   | 0.0003  |
| 36     | Q9QZX7    | Serine racemase                                                        | <i>Srr</i>     | -2.6312   | 0.0003  |
| 37     | P48453    | Serine/threonine-protein phosphatase 2B catalytic subunit beta isoform | <i>Ppp3cb</i>  | -2.6280   | 0.0003  |
| 38     | O08600    | Endonuclease G mitochondrial                                           | <i>Endog</i>   | -2.6202   | 0.0003  |
| 39     | P51881    | ADP/ATP translocase 2                                                  | <i>Slc25a5</i> | -2.6031   | 0.0004  |
| 40     | Q92111    | Serotransferrin                                                        | <i>Tf</i>      | -2.5951   | 0.0004  |
| 41     | P57746    | V-type proton ATPase subunit D                                         | <i>Atp6v1d</i> | -2.5795   | 0.0004  |
| 42     | Q80X60    | EF-hand calcium-binding domain-containing protein 3                    | <i>Efcab3</i>  | -2.5790   | 0.0004  |
| 43     | P68254    | 14-3-3 protein theta                                                   | <i>Ywha9</i>   | -2.5690   | 0.0004  |
| 44     | Q06185    | ATP synthase subunit e mitochondrial                                   | <i>Atp5me</i>  | -2.5600   | 0.0004  |
| 45     | Q811L6    | Microtubule-associated serine/threonine-protein kinase 4               | <i>Mast4</i>   | -2.5549   | 0.0004  |
| 46     | P46460    | Vesicle-fusing ATPase                                                  | <i>Nsf</i>     | -2.5515   | 0.0004  |
| 47     | P01029    | Complement C4-B                                                        | <i>C4b</i>     | -2.5336   | 0.0004  |
| 48     | P08249    | Malate dehydrogenase mitochondrial                                     | <i>Mdh2</i>    | -2.5211   | 0.0004  |
| 49     | P40240    | CD9 antigen                                                            | <i>Cd9</i>     | -2.5192   | 0.0004  |
| 50     | P51910    | Apolipoprotein D                                                       | <i>Apod</i>    | -2.4981   | 0.0004  |
| 51     | P47757    | F-actin-capping protein subunit beta                                   | <i>Capzb</i>   | -2.4938   | 0.0004  |
| 52     | Q9D711    | Pirin                                                                  | <i>Pir</i>     | -2.4892   | 0.0004  |
| 53     | Q9ESM3    | Hyaluronan and proteoglycan link protein 2                             | <i>Hapl2</i>   | -2.4723   | 0.0004  |
| 54     | P84075    | Neuron-specific calcium-binding protein hippocalcin                    | <i>Hpca</i>    | -2.4623   | 0.0004  |
| 55     | P15626    | Glutathione S-transferase Mu 2                                         | <i>Gstm2</i>   | -2.4548   | 0.0004  |
| 56     | Q61282    | Aggrecan core protein                                                  | <i>Acan</i>    | -2.4406   | 0.0004  |
| 57     | P35846    | Folate receptor alpha                                                  | <i>Folr1</i>   | -2.4347   | 0.0004  |
| 58     | P62702    | 40S ribosomal protein S4 X isoform                                     | <i>Rps4x</i>   | -2.4258   | 0.0004  |
| 59     | P68033    | Actin alpha cardiac muscle 1                                           | <i>Actc1</i>   | -2.4216   | 0.0004  |
| 60     | P55200    | Histone-lysine N-methyltransferase 2A                                  | <i>Kmt2a</i>   | -2.4134   | 0.0004  |
| 61     | P19536    | Cytochrome c oxidase subunit 5B mitochondrial                          | <i>Cox5b</i>   | -2.4079   | 0.0004  |
| 62     | Q80VQ0    | Aldehyde dehydrogenase family 3 member B1                              | <i>Aldh3b1</i> | -2.3677   | 0.0005  |
| 63     | Q9DBJ1    | Phosphoglycerate mutase 1                                              | <i>Pgam1</i>   | -2.3664   | 0.0005  |
| 64     | Q9D4F2    | Phospholipid phosphatase 6                                             | <i>Plpp6</i>   | -2.3636   | 0.0005  |
| 65     | Q60931    | Voltage-dependent anion-selective channel protein 3                    | <i>Vdac3</i>   | -2.3590   | 0.0005  |
| 66     | P05064    | Fructose-bisphosphate aldolase A                                       | <i>Aldoa</i>   | -2.3422   | 0.0005  |
| 67     | Q9D051    | Pyruvate dehydrogenase E1 component subunit beta mitochondrial         | <i>Pdhb</i>    | -2.3153   | 0.0006  |
| 68     | Q61646    | Haptoglobin                                                            | <i>Hp</i>      | -2.3139   | 0.0006  |
| 69     | Q80W21    | Glutathione S-transferase Mu 7                                         | <i>Gstm7</i>   | -2.3020   | 0.0006  |
| 70     | Q9D7B6    | Isobutyryl-CoA dehydrogenase mitochondrial                             | <i>Acad8</i>   | -2.2881   | 0.0006  |
| 71     | Q64332    | Synapsin-2                                                             | <i>Syn2</i>    | -2.2875   | 0.0006  |
| 72     | P59764    | Dedicator of cytokinesis protein 4                                     | <i>Dock4</i>   | -2.2841   | 0.0006  |
| 73     | P54071    | Isocitrate dehydrogenase [NADP] mitochondrial                          | <i>Ihd2</i>    | -2.2762   | 0.0006  |
| 74     | P01864    | Ig gamma-2A chain C region secreted form                               |                | -2.2711   | 0.0006  |
| 75     | Q6P9Q6    | FK506-binding protein 15                                               | <i>Fkbp15</i>  | -2.2408   | 0.0006  |
| 76     | Q80WR1    | Tetraspanin-18                                                         | <i>Tspan18</i> | -2.2408   | 0.0006  |
| 77     | Q3UGR5    | Haloacid dehalogenase-like hydrolase domain-containing protein 2       | <i>Hdh2</i>    | -2.2357   | 0.0006  |

|     |        |                                                                                                          |                 |         |        |
|-----|--------|----------------------------------------------------------------------------------------------------------|-----------------|---------|--------|
| 78  | Q3URD3 | Sarcolemmal membrane-associated protein                                                                  | <i>Slmap</i>    | -2.2353 | 0.0006 |
| 79  | Q9DCT2 | NADH dehydrogenase [ubiquinone] iron-sulfur protein 3 mitochondrial                                      | <i>Ndufs3</i>   | -2.2348 | 0.0006 |
| 80  | P19639 | Glutathione S-transferase Mu 3                                                                           | <i>Gstm3</i>    | -2.2332 | 0.0006 |
| 81  | P11679 | Keratin type II cytoskeletal 8                                                                           | <i>Krt8</i>     | -2.2264 | 0.0006 |
| 82  | G3X9J0 | Signal-induced proliferation-associated 1-like protein 3                                                 | <i>Sipa1l3</i>  | -2.1856 | 0.0007 |
| 83  | O88533 | Aromatic-L-amino-acid decarboxylase                                                                      | <i>Ddc</i>      | -2.1762 | 0.0007 |
| 84  | Q9QUP5 | Hyaluronan and proteoglycan link protein 1                                                               | <i>Hapl1</i>    | -2.1755 | 0.0007 |
| 85  | P63318 | Protein kinase C gamma type                                                                              | <i>Prkcg</i>    | -2.1606 | 0.0007 |
| 86  | Q9ERD7 | Tubulin beta-3 chain                                                                                     | <i>Tubb3</i>    | -2.1528 | 0.0007 |
| 87  | Q99199 | 3-mercaptopyruvate sulfurtransferase                                                                     | <i>Mpst</i>     | -2.1494 | 0.0007 |
| 88  | Q62446 | Peptidyl-prolyl cis-trans isomerase FKBP3                                                                | <i>Fkbp3</i>    | -2.1482 | 0.0007 |
| 89  | P16858 | Glyceraldehyde-3-phosphate dehydrogenase                                                                 | <i>Gapdh</i>    | -2.1396 | 0.0007 |
| 90  | Q99K85 | Phosphoserine aminotransferase                                                                           | <i>Psat1</i>    | -2.1336 | 0.0007 |
| 91  | Q8R164 | Valacyclovir hydrolase                                                                                   | <i>Bphl</i>     | -2.1217 | 0.0007 |
| 92  | P03995 | Glial fibrillary acidic protein                                                                          | <i>Gfap</i>     | -2.1177 | 0.0007 |
| 93  | Q9CQA3 | Succinate dehydrogenase [ubiquinone] iron-sulfur subunit mitochondrial                                   | <i>Sdhb</i>     | -2.1091 | 0.0007 |
| 94  | Q9CQ65 | S-methyl-5'-thioadenosine phosphorylase                                                                  | <i>Mtap</i>     | -2.1022 | 0.0007 |
| 95  | Q9D338 | 39S ribosomal protein L19 mitochondrial                                                                  | <i>Mrpl19</i>   | -2.1022 | 0.0007 |
| 96  | Q9D710 | Thioredoxin-related transmembrane protein 2                                                              | <i>Tmx2</i>     | -2.0884 | 0.0008 |
| 97  | Q9JJZ2 | Tubulin alpha-8 chain                                                                                    | <i>Tuba8</i>    | -2.0794 | 0.0008 |
| 98  | P39061 | Collagen alpha-1(XVIII) chain                                                                            | <i>Col18a1</i>  | -2.0553 | 0.0008 |
| 99  | P48774 | Glutathione S-transferase Mu 5                                                                           | <i>Gstm5</i>    | -2.0474 | 0.0008 |
| 100 | P13808 | Anion exchange protein 2                                                                                 | <i>Slc4a2</i>   | -2.0371 | 0.0008 |
| 101 | P01638 | Ig kappa chain V-V region L6 (Fragment)                                                                  | <i>4 SV</i>     | -2.0371 | 0.0008 |
| 102 | P01637 | Ig kappa chain V-V region T1                                                                             | <i>4 SV</i>     | -2.0371 | 0.0008 |
| 103 | Q91V41 | Ras-related protein Rab-14                                                                               | <i>Rab14</i>    | -2.0267 | 0.0008 |
| 104 | P48758 | Carbonyl reductase [NADPH] 1                                                                             | <i>Cbr1</i>     | -2.0157 | 0.0009 |
| 105 | P10605 | Cathepsin B                                                                                              | <i>Ctsb</i>     | -2.0081 | 0.0009 |
| 106 | Q9CR00 | 26S proteasome non-ATPase regulatory subunit 9                                                           | <i>Psmc9</i>    | -2.0048 | 0.0009 |
| 107 | Q9QUM9 | Proteasome subunit alpha type-6                                                                          | <i>Psmc6</i>    | -1.9979 | 0.0009 |
| 108 | P62897 | Cytochrome c somatic                                                                                     | <i>Cycc</i>     | -1.9974 | 0.0009 |
| 109 | Q8BHB9 | Chloride intracellular channel protein 6                                                                 | <i>Clcc6</i>    | -1.9942 | 0.0009 |
| 110 | P23242 | Gap junction alpha-1 protein                                                                             | <i>Gja1</i>     | -1.9862 | 0.0009 |
| 111 | O35143 | ATPase inhibitor mitochondrial                                                                           | <i>Atp5if1</i>  | -1.9861 | 0.0009 |
| 112 | Q64105 | Sepiapterin reductase                                                                                    | <i>Spr</i>      | -1.9855 | 0.0009 |
| 113 | P20444 | Protein kinase C alpha type                                                                              | <i>Prkca</i>    | -1.9847 | 0.0009 |
| 114 | P62748 | Hippocalcin-like protein 1                                                                               | <i>Hpcal1</i>   | -1.9794 | 0.0009 |
| 115 | Q9D7X1 | BTB/POZ domain-containing protein KCTD4                                                                  | <i>Kctd4</i>    | -1.9764 | 0.0009 |
| 116 | P01837 | Immunoglobulin kappa constant                                                                            | <i>Igkc</i>     | -1.9764 | 0.0009 |
| 117 | Q9CZU6 | Citrate synthase mitochondrial                                                                           | <i>Cs</i>       | -1.9697 | 0.0009 |
| 118 | P63328 | Serine/threonine-protein phosphatase 2B catalytic subunit alpha isoform                                  | <i>Ppp3ca</i>   | -1.9689 | 0.0009 |
| 119 | P06151 | L-lactate dehydrogenase A chain                                                                          | <i>Ldha</i>     | -1.9592 | 0.0010 |
| 120 | Q8VEL9 | GTP-binding protein REM 2                                                                                | <i>Rem2</i>     | -1.9546 | 0.0010 |
| 121 | Q99KK2 | N-acylneuraminyl cytidyltransferase                                                                      | <i>Cmas</i>     | -1.9501 | 0.0010 |
| 122 | O35459 | Delta(3 5)-Delta(2 4)-dienoyl-CoA isomerase mitochondrial                                                | <i>Ech1</i>     | -1.9482 | 0.0010 |
| 123 | Q8BRF7 | Sec1 family domain-containing protein 1                                                                  | <i>Scfd1</i>    | -1.9244 | 0.0010 |
| 124 | P23819 | Glutamate receptor 2                                                                                     | <i>Gria2</i>    | -1.9119 | 0.0011 |
| 125 | P59281 | Rho GTPase-activating protein 39                                                                         | <i>Arhgap39</i> | -1.9087 | 0.0011 |
| 126 | Q9D6G9 | CKLF-like MARVEL transmembrane domain-containing protein 5                                               | <i>Cmtm5</i>    | -1.9049 | 0.0011 |
| 127 | P97447 | Four and a half LIM domains protein 1                                                                    | <i>Fhl1</i>     | -1.9004 | 0.0011 |
| 128 | P05202 | Aspartate aminotransferase mitochondrial                                                                 | <i>Got2</i>     | -1.8966 | 0.0011 |
| 129 | Q3UQ44 | Ras GTPase-activating-like protein IQGAP2                                                                | <i>Iqgap2</i>   | -1.8745 | 0.0011 |
| 130 | P09470 | Angiotensin-converting enzyme                                                                            | <i>Ace</i>      | -1.8683 | 0.0011 |
| 131 | P70261 | Paladin                                                                                                  | <i>Pald1</i>    | -1.8668 | 0.0011 |
| 132 | Q9DB26 | Phytoenyl-CoA dioxygenase domain-containing protein 1                                                    | <i>Phyhd1</i>   | -1.8668 | 0.0011 |
| 133 | Q991Y9 | Actin-related protein 3                                                                                  | <i>Actr3</i>    | -1.8643 | 0.0011 |
| 134 | Q9CVB6 | Actin-related protein 2/3 complex subunit 2                                                              | <i>Arpc2</i>    | -1.8621 | 0.0011 |
| 135 | Q61414 | Keratin type I cytoskeletal 15                                                                           | <i>Krt15</i>    | -1.8615 | 0.0011 |
| 136 | Q80ZJ1 | Ras-related protein Rap-2a                                                                               | <i>Rap2a</i>    | -1.8613 | 0.0011 |
| 137 | Q8BK63 | Casein kinase I isoform alpha                                                                            | <i>Csnk1a1</i>  | -1.8498 | 0.0011 |
| 138 | Q3UMR5 | Calcium uniporter protein mitochondrial                                                                  | <i>Mcu</i>      | -1.8498 | 0.0011 |
| 139 | P63321 | Ras-related protein Ral-A                                                                                | <i>Rala</i>     | -1.8489 | 0.0011 |
| 140 | Q3TRR0 | Microtubule-associated protein 9                                                                         | <i>Map9</i>     | -1.8341 | 0.0012 |
| 141 | Q9D8Y1 | Transmembrane protein 126A                                                                               | <i>Tmem126a</i> | -1.8341 | 0.0012 |
| 142 | A2ALK8 | Tyrosine-protein phosphatase non-receptor type 3                                                         | <i>Ptpn3</i>    | -1.8329 | 0.0012 |
| 143 | Q9WV68 | Peroxisomal 2 4-dienoyl-CoA reductase [(3E)-enoyl-CoA-producing]                                         | <i>Decr2</i>    | -1.8303 | 0.0012 |
| 144 | Q02013 | Aquaporin-1                                                                                              | <i>Aqp1</i>     | -1.8303 | 0.0012 |
| 145 | Q8R059 | UDP-glucose 4-epimerase                                                                                  | <i>Gale</i>     | -1.8301 | 0.0012 |
| 146 | Q9D287 | Pre-mRNA-splicing factor SPF27                                                                           | <i>Bcas2</i>    | -1.8215 | 0.0012 |
| 147 | Q5SYL3 | Protein KIAA0100                                                                                         | <i>Kiaa0100</i> | -1.8215 | 0.0012 |
| 148 | Q9CQR4 | Acyl-coenzyme A thioesterase 13                                                                          | <i>Acot13</i>   | -1.8191 | 0.0012 |
| 149 | Q8VDD5 | Myosin-9                                                                                                 | <i>Myh9</i>     | -1.8113 | 0.0012 |
| 150 | P41233 | Phospholipid-transporting ATPase ABCA1                                                                   | <i>Abca1</i>    | -1.8103 | 0.0012 |
| 151 | P55012 | Solute carrier family 12 member 2                                                                        | <i>Slc12a2</i>  | -1.8040 | 0.0012 |
| 152 | Q8CIZ8 | von Willebrand factor                                                                                    | <i>Vwf</i>      | -1.8021 | 0.0012 |
| 153 | Q9JLC8 | Sacsin                                                                                                   | <i>Sacs</i>     | -1.8015 | 0.0012 |
| 154 | P01878 | Ig alpha chain C region                                                                                  |                 | -1.8007 | 0.0012 |
| 155 | O09131 | Glutathione S-transferase omega-1                                                                        | <i>Gsto1</i>    | -1.7987 | 0.0012 |
| 156 | Q8BMF4 | Dihydropyridyllysine-residue acetyltransferase component of pyruvate dehydrogenase complex mitochondrial | <i>Dlat</i>     | -1.7925 | 0.0013 |

|     |        |                                                                     |                 |         |        |
|-----|--------|---------------------------------------------------------------------|-----------------|---------|--------|
| 157 | P63242 | Eukaryotic translation initiation factor 5A-1                       | <i>Eif5a</i>    | -1.7912 | 0.0013 |
| 158 | O88545 | COP9 signalosome complex subunit 6                                  | <i>Cops6</i>    | -1.7911 | 0.0013 |
| 159 | P47754 | F-actin-capping protein subunit alpha-2                             | <i>Capza2</i>   | -1.7886 | 0.0013 |
| 160 | Q9WV55 | Vesicle-associated membrane protein-associated protein A            | <i>Vapa</i>     | -1.7864 | 0.0013 |
| 161 | Q5U4C1 | G-protein coupled receptor-associated sorting protein 1             | <i>Gprasp1</i>  | -1.7810 | 0.0013 |
| 162 | Q8K0E8 | Fibrinogen beta chain                                               | <i>Fgb</i>      | -1.7783 | 0.0013 |
| 163 | Q8CGF6 | WD repeat-containing protein 47                                     | <i>Wdr47</i>    | -1.7666 | 0.0014 |
| 164 | P62823 | Ras-related protein Rab-3C                                          | <i>Rab3c</i>    | -1.7516 | 0.0014 |
| 165 | P62259 | 14-3-3 protein epsilon                                              | <i>Ywhae</i>    | -1.7512 | 0.0014 |
| 166 | P62754 | 40S ribosomal protein S6                                            | <i>Rps6</i>     | -1.7469 | 0.0014 |
| 167 | P52825 | Carnitine O-palmitoyltransferase 2 mitochondrial                    | <i>Cpt2</i>     | -1.7412 | 0.0015 |
| 168 | P34022 | Ran-specific GTPase-activating protein                              | <i>Ranbp1</i>   | -1.7345 | 0.0015 |
| 169 | Q9DAM5 | Mitochondrial thiamine pyrophosphate carrier                        | <i>Slc25a19</i> | -1.7302 | 0.0015 |
| 170 | Q8VCM7 | Fibrinogen gamma chain                                              | <i>Fgg</i>      | -1.7289 | 0.0015 |
| 171 | Q99JP6 | Homer protein homolog 3                                             | <i>Homer3</i>   | -1.7289 | 0.0015 |
| 172 | Q9CQ75 | NADH dehydrogenase [ubiquinone] 1 alpha subcomplex subunit 2        | <i>Ndufa2</i>   | -1.7253 | 0.0015 |
| 173 | Q9JM52 | Missshapen-like kinase 1                                            | <i>Mink1</i>    | -1.7167 | 0.0015 |
| 174 | P01867 | Ig gamma-2B chain C region                                          | <i>Igh-3</i>    | -1.7116 | 0.0015 |
| 175 | Q8BV14 | Dihydropteridine reductase                                          | <i>Qdpr</i>     | -1.6984 | 0.0015 |
| 176 | P68369 | Tubulin alpha-1A chain                                              | <i>Tuba1a</i>   | -1.6971 | 0.0015 |
| 177 | Q9D0M3 | Cytochrome c1 heme protein mitochondrial                            | <i>Cyc1</i>     | -1.6933 | 0.0016 |
| 178 | O54991 | Contactin-associated protein 1                                      | <i>Cntnap1</i>  | -1.6921 | 0.0016 |
| 179 | P58871 | 182 kDa tankyrase-1-binding protein                                 | <i>Tnks1bp1</i> | -1.6915 | 0.0016 |
| 180 | Q9WTU3 | Sodium channel protein type 8 subunit alpha                         | <i>Scn8a</i>    | -1.6850 | 0.0016 |
| 181 | P14152 | Malate dehydrogenase cytoplasmic                                    | <i>Mdh1</i>     | -1.6817 | 0.0016 |
| 182 | P63087 | Serine/threonine-protein phosphatase PP1-gamma catalytic subunit    | <i>Ppp1cc</i>   | -1.6812 | 0.0016 |
| 183 | P05213 | Tubulin alpha-1B chain                                              | <i>Tuba1b</i>   | -1.6739 | 0.0016 |
| 184 | Q8VDQ8 | NAD-dependent protein deacetylase sirtuin-2                         | <i>Sirt2</i>    | -1.6690 | 0.0016 |
| 185 | P25785 | Metalloproteinase inhibitor 2                                       | <i>Timp2</i>    | -1.6689 | 0.0016 |
| 186 | Q3ZK22 | Vezatin                                                             | <i>Vezt</i>     | -1.6689 | 0.0016 |
| 187 | P52840 | Sulfotransferase 1A1                                                | <i>Sult1a1</i>  | -1.6689 | 0.0016 |
| 188 | Q8BZ60 | Stonin-2                                                            | <i>Ston2</i>    | -1.6663 | 0.0016 |
| 189 | Q91V64 | Isochorismatase domain-containing protein 1                         | <i>Isoc1</i>    | -1.6606 | 0.0016 |
| 190 | Q99LS3 | Phosphoserine phosphatase                                           | <i>Psph</i>     | -1.6606 | 0.0016 |
| 191 | Q9CZB0 | Succinate dehydrogenase cytochrome b560 subunit mitochondrial       | <i>Sdhc</i>     | -1.6460 | 0.0017 |
| 192 | Q8BMS1 | Trifunctional enzyme subunit alpha mitochondrial                    | <i>Hadha</i>    | -1.6447 | 0.0017 |
| 193 | P62307 | Small nuclear ribonucleoprotein F                                   | <i>Snrpf</i>    | -1.6386 | 0.0017 |
| 194 | Q920N7 | Synaptotagmin-12                                                    | <i>Syt12</i>    | -1.6375 | 0.0017 |
| 195 | P63260 | Actin cytoplasmic 2                                                 | <i>Actg1</i>    | -1.6339 | 0.0017 |
| 196 | P49615 | Cyclin-dependent-like kinase 5                                      | <i>Cdk5</i>     | -1.6330 | 0.0017 |
| 197 | P68373 | Tubulin alpha-1C chain                                              | <i>Tuba1c</i>   | -1.6299 | 0.0017 |
| 198 | Q6WKZ8 | E3 ubiquitin-protein ligase UBR2                                    | <i>Ubr2</i>     | -1.6218 | 0.0017 |
| 199 | Q62418 | Drebrin-like protein                                                | <i>Dbr1</i>     | -1.6209 | 0.0017 |
| 200 | Q80X95 | Ras-related GTP-binding protein A                                   | <i>Rraga</i>    | -1.6148 | 0.0017 |
| 201 | Q9R0P9 | Ubiquitin carboxyl-terminal hydrolase isozyme L1                    | <i>Uchl1</i>    | -1.6145 | 0.0017 |
| 202 | Q55WU9 | Acetyl-CoA carboxylase 1                                            | <i>Acaca</i>    | -1.6136 | 0.0017 |
| 203 | Q8CI71 | Syndetin                                                            | <i>Vps50</i>    | -1.6054 | 0.0018 |
| 204 | Q3UNZ8 | Quinone oxidoreductase-like protein 2                               | <i>Cryz12</i>   | -1.6039 | 0.0018 |
| 205 | P58771 | Tropomyosin alpha-1 chain                                           | <i>Tpm1</i>     | -1.5987 | 0.0018 |
| 206 | Q9R112 | Sulfide:quinone oxidoreductase mitochondrial                        | <i>Sqor</i>     | -1.5927 | 0.0018 |
| 207 | P18526 | Ig heavy chain V region 345                                         |                 | -1.5912 | 0.0018 |
| 208 | P70407 | Cadherin-9                                                          | <i>Cdh9</i>     | -1.5912 | 0.0018 |
| 209 | Q64374 | Regucalcin                                                          | <i>Rgn</i>      | -1.5912 | 0.0018 |
| 210 | P62700 | Protein yippee-like 5                                               | <i>Ypel5</i>    | -1.5912 | 0.0018 |
| 211 | Q9CR62 | Mitochondrial 2-oxoglutarate/malate carrier protein                 | <i>Slc25a11</i> | -1.5881 | 0.0019 |
| 212 | Q91XE4 | N-acyl-aromatic-L-amino acid amidohydrolase (carboxylate-forming)   | <i>Acy3</i>     | -1.5813 | 0.0019 |
| 213 | Q6X893 | Choline transporter-like protein 1                                  | <i>Slc44a1</i>  | -1.5783 | 0.0019 |
| 214 | Q9WV96 | Mitochondrial import inner membrane translocase subunit Tim10 B     | <i>Timm10b</i>  | -1.5735 | 0.0019 |
| 215 | Q9JII6 | Aldo-keto reductase family 1 member A1                              | <i>Akr1a1</i>   | -1.5694 | 0.0019 |
| 216 | Q8BKN5 | Gamma-tubulin complex component 5                                   | <i>Tubgcp5</i>  | -1.5680 | 0.0019 |
| 217 | A2APX8 | Sodium channel protein type 1 subunit alpha                         | <i>Scn1a</i>    | -1.5655 | 0.0019 |
| 218 | Q9DB16 | Calcium-binding protein 39-like                                     | <i>Cab39l</i>   | -1.5648 | 0.0019 |
| 219 | P07309 | Transthyretin                                                       | <i>Ttr</i>      | -1.5614 | 0.0019 |
| 220 | Q99JR5 | Tubulointerstitial nephritis antigen-like                           | <i>Tinagl1</i>  | -1.5609 | 0.0019 |
| 221 | Q91WT9 | Cystathionine beta-synthase                                         | <i>Cbs</i>      | -1.5580 | 0.0020 |
| 222 | Q99LB6 | Methionine adenosyltransferase 2 subunit beta                       | <i>Mat2b</i>    | -1.5544 | 0.0020 |
| 223 | Q3UHB1 | 5'-nucleotidase domain-containing protein 3                         | <i>Nt5dc3</i>   | -1.5524 | 0.0020 |
| 224 | P70336 | Rho-associated protein kinase 2                                     | <i>Rock2</i>    | -1.5509 | 0.0020 |
| 225 | Q8K3J1 | NADH dehydrogenase [ubiquinone] iron-sulfur protein 8 mitochondrial | <i>Ndufs8</i>   | -1.5444 | 0.0020 |
| 226 | Q80U35 | Rho guanine nucleotide exchange factor 17                           | <i>Arhgef17</i> | -1.5415 | 0.0020 |
| 227 | O08677 | Kinogen-1                                                           | <i>Kng1</i>     | -1.5403 | 0.0020 |
| 228 | P63082 | V-type proton ATPase 16 kDa proteolipid subunit                     | <i>Atp6v0c</i>  | -1.5374 | 0.0020 |
| 229 | Q1RLL3 | Copine-9                                                            | <i>Cpne9</i>    | -1.5365 | 0.0020 |
| 230 | P29387 | Guanine nucleotide-binding protein subunit beta-4                   | <i>Gnb4</i>     | -1.5291 | 0.0021 |
| 231 | Q9CQ69 | Cytochrome b-c1 complex subunit 8                                   | <i>Uqcrcq</i>   | -1.5266 | 0.0021 |
| 232 | P23492 | Purine nucleoside phosphorylase                                     | <i>Pnp</i>      | -1.5261 | 0.0021 |
| 233 | P11835 | Integrin beta-2                                                     | <i>Itgb2</i>    | -1.5244 | 0.0021 |
| 234 | Q9J169 | Kv channel-interacting protein 2                                    | <i>Kcni2</i>    | -1.5244 | 0.0021 |
| 235 | Q99K23 | Ufm1-specific protease 2                                            | <i>Ufsp2</i>    | -1.5202 | 0.0021 |

|     |        |                                                                       |                |         |        |
|-----|--------|-----------------------------------------------------------------------|----------------|---------|--------|
| 236 | Q9CWE0 | Mitochondrial fission regulator 1-like                                | <i>Mtfr1l</i>  | -1.5145 | 0.0022 |
| 237 | O70250 | Phosphoglycerate mutase 2                                             | <i>Pgam2</i>   | -1.5142 | 0.0022 |
| 238 | Q641K1 | Cytosolic carboxypeptidase 1                                          | <i>Agtpbp1</i> | -1.5138 | 0.0022 |
| 239 | Q5SYD0 | Unconventional myosin-Id                                              | <i>Myo1d</i>   | -1.5123 | 0.0022 |
| 240 | Q9CQV8 | 14-3-3 protein beta/alpha                                             | <i>Ywhab</i>   | -1.5120 | 0.0022 |
| 241 | P60710 | Actin cytoplasmic 1                                                   | <i>Actb</i>    | -1.5119 | 0.0022 |
| 242 | P02535 | Keratin type I cytoskeletal 10                                        | <i>Krt10</i>   | -1.5102 | 0.0022 |
| 243 | P70335 | Rho-associated protein kinase 1                                       | <i>Rock1</i>   | -1.5093 | 0.0022 |
| 244 | P97384 | Annexin A11                                                           | <i>Anxa11</i>  | -1.5087 | 0.0022 |
| 245 | Q91WG7 | Diacylglycerol kinase gamma                                           | <i>Dgkg</i>    | -1.5052 | 0.0022 |
| 246 | P19157 | Glutathione S-transferase P 1                                         | <i>Gstp1</i>   | -1.5014 | 0.0022 |
| 247 | B1AXH1 | NHS-like protein 2                                                    | <i>Nhs12</i>   | -1.4957 | 0.0023 |
| 248 | Q7M759 | Alpha/beta hydrolase domain-containing protein 17B                    | <i>Abhd17b</i> | -1.4938 | 0.0023 |
| 249 | Q9R1S8 | Calpain-7                                                             | <i>Capn7</i>   | -1.4938 | 0.0023 |
| 250 | Q9CWD3 | Nucleoside diphosphate-linked moiety X motif 17                       | <i>Nudt17</i>  | -1.4938 | 0.0023 |
| 251 | Q9EST4 | Proteasome assembly chaperone 2                                       | <i>Psmg2</i>   | -1.4938 | 0.0023 |
| 252 | Q3V4B5 | COMM domain-containing protein 6                                      | <i>Comm6</i>   | -1.4938 | 0.0023 |
| 253 | Q6NZK8 | Protein tyrosine phosphatase domain-containing protein 1              | <i>Ptpdc1</i>  | -1.4938 | 0.0023 |
| 254 | Q925N0 | Sideroflexin-5                                                        | <i>Sfxn5</i>   | -1.4931 | 0.0023 |
| 255 | Q9DC53 | Copine-8                                                              | <i>Cpne8</i>   | -1.4876 | 0.0023 |
| 256 | P70206 | Plexin-A1                                                             | <i>Plxn1</i>   | -1.4872 | 0.0023 |
| 257 | O89112 | Glutathione S-transferase LANCL1                                      | <i>Lancl1</i>  | -1.4860 | 0.0023 |
| 258 | Q60994 | Adiponectin                                                           | <i>Adipoq</i>  | -1.4851 | 0.0023 |
| 259 | P28828 | Receptor-type tyrosine-protein phosphatase mu                         | <i>Ptprm</i>   | -1.4851 | 0.0023 |
| 260 | P15105 | Glutamine synthetase                                                  | <i>Glul</i>    | -1.4824 | 0.0023 |
| 261 | Q8BW96 | Calcium/calmodulin-dependent protein kinase type 1D                   | <i>Camk1d</i>  | -1.4814 | 0.0023 |
| 262 | Q8BGY7 | Protein FAM210A                                                       | <i>Fam210a</i> | -1.4807 | 0.0023 |
| 263 | P17182 | Alpha-enolase                                                         | <i>Eno1</i>    | -1.4794 | 0.0024 |
| 264 | P62874 | Guanine nucleotide-binding protein G(I)/G(S)/G(T) subunit beta-1      | <i>Gnb1</i>    | -1.4755 | 0.0024 |
| 265 | Q9JJ61 | Polypeptide N-acetylgalactosaminyltransferase 16                      | <i>Galnt16</i> | -1.4740 | 0.0024 |
| 266 | P01654 | Ig kappa chain V-III region PC 2880/PC 1229                           |                | -1.4740 | 0.0024 |
| 267 | P01656 | Ig kappa chain V-III region MOPC 70                                   |                | -1.4740 | 0.0024 |
| 268 | Q35668 | Huntingtin-associated protein 1                                       | <i>Hap1</i>    | -1.4740 | 0.0024 |
| 269 | Q8BL57 | Ankyrin repeat domain-containing protein SOWAHA                       | <i>Sowaha</i>  | -1.4740 | 0.0024 |
| 270 | Q80ZW2 | Protein THEM6                                                         | <i>Them6</i>   | -1.4669 | 0.0025 |
| 271 | Q80TL0 | Protein phosphatase 1E                                                | <i>Ppm1e</i>   | -1.4659 | 0.0025 |
| 272 | Q68SA9 | A disintegrin and metalloproteinase with thrombospondin motifs 7      | <i>Adams7</i>  | -1.4650 | 0.0025 |
| 273 | Q8R0F8 | Acylpyruvase FAHD1 mitochondrial                                      | <i>Fah1</i>    | -1.4650 | 0.0025 |
| 274 | Q9D1G1 | Ras-related protein Rab-1B                                            | <i>Rab1b</i>   | -1.4644 | 0.0025 |
| 275 | O08553 | Dihydropyrimidinase-related protein 2                                 | <i>Dpysl2</i>  | -1.4640 | 0.0025 |
| 276 | Q03265 | ATP synthase subunit alpha mitochondrial                              | <i>Atp5f1a</i> | -1.4627 | 0.0025 |
| 277 | P63101 | 14-3-3 protein zeta/delta                                             | <i>Ywhaz</i>   | -1.4607 | 0.0025 |
| 278 | P17751 | Triosephosphate isomerase                                             | <i>Tpi1</i>    | -1.4607 | 0.0025 |
| 279 | P53808 | Phosphatidylcholine transfer protein                                  | <i>Pctp</i>    | -1.4595 | 0.0025 |
| 280 | P00015 | Cytochrome c testis-specific                                          | <i>Cyct</i>    | -1.4595 | 0.0025 |
| 281 | Q62288 | Testican-1                                                            | <i>Spock1</i>  | -1.4595 | 0.0025 |
| 282 | Q9CQD1 | Ras-related protein Rab-5A                                            | <i>Rab5a</i>   | -1.4595 | 0.0025 |
| 283 | Q9D2P8 | Myelin-associated oligodendrocyte basic protein                       | <i>Mobp</i>    | -1.4587 | 0.0025 |
| 284 | Q571B6 | WASP homolog-associated protein with actin membranes and microtubules | <i>Whamm</i>   | -1.4585 | 0.0025 |
| 285 | P28663 | Beta-soluble NSF attachment protein                                   | <i>Napb</i>    | -1.4583 | 0.0025 |
| 286 | Q8C194 | Glycogen phosphorylase brain form                                     | <i>Pygb</i>    | -1.4553 | 0.0026 |
| 287 | Q8BWU8 | Ethanolamine-phosphate phospho-lyase                                  | <i>Etnpl</i>   | -1.4552 | 0.0026 |
| 288 | P17225 | Polypyrimidine tract-binding protein 1                                | <i>Ptbp1</i>   | -1.4551 | 0.0026 |
| 289 | Q9CQI6 | Coactosin-like protein                                                | <i>Cotl1</i>   | -1.4547 | 0.0026 |
| 290 | O55023 | Inositol monophosphatase 1                                            | <i>Impa1</i>   | -1.4535 | 0.0026 |
| 291 | Q9QZF2 | Glypican-1                                                            | <i>Gpc1</i>    | -1.4513 | 0.0026 |
| 292 | P56371 | Ras-related protein Rab-4A                                            | <i>Rab4a</i>   | -1.4496 | 0.0026 |
| 293 | Q3UIP5 | Protein C8orf37 homolog                                               |                | -1.4489 | 0.0026 |
| 294 | Q9DCC8 | Mitochondrial import receptor subunit TOM20 homolog                   | <i>Tomm20</i>  | -1.4489 | 0.0026 |
| 295 | Q9CTY5 | Calcium uptake protein 3 mitochondrial                                | <i>Micu3</i>   | -1.4424 | 0.0027 |
| 296 | Q64378 | Peptidyl-prolyl cis-trans isomerase FKBP5                             | <i>Fkbp5</i>   | -1.4393 | 0.0027 |
| 297 | Q8BMS4 | Ubiquinone biosynthesis O-methyltransferase mitochondrial             | <i>Coq3</i>    | -1.4393 | 0.0027 |
| 298 | P62137 | Serine/threonine-protein phosphatase PP1-alpha catalytic subunit      | <i>Ppp1ca</i>  | -1.4331 | 0.0027 |
| 299 | P08551 | Neurofilament light polypeptide                                       | <i>Nefl</i>    | -1.4326 | 0.0027 |
| 300 | B2RUR8 | OTU domain-containing protein 7B                                      | <i>Otud7b</i>  | -1.4268 | 0.0027 |
| 301 | P70248 | Unconventional myosin-If                                              | <i>Myo1f</i>   | -1.4202 | 0.0030 |
| 302 | Q8K382 | DENN domain-containing protein 1A                                     | <i>Dennd1a</i> | -1.4202 | 0.0030 |
| 303 | P70302 | Stromal interaction molecule 1                                        | <i>Stim1</i>   | -1.4195 | 0.0030 |
| 304 | P61021 | Ras-related protein Rab-5B                                            | <i>Rab5b</i>   | -1.4158 | 0.0030 |
| 305 | P23818 | Glutamate receptor 1                                                  | <i>Gria1</i>   | -1.4146 | 0.0031 |
| 306 | Q8BT60 | Copine-3                                                              | <i>Cpne3</i>   | -1.4086 | 0.0031 |
| 307 | P09528 | Ferritin heavy chain                                                  | <i>Fth1</i>    | -1.4044 | 0.0031 |
| 308 | P56382 | ATP synthase subunit epsilon mitochondrial                            | <i>Atp5f1e</i> | -1.3973 | 0.0032 |
| 309 | Q9CXS4 | Centromere protein V                                                  | <i>Cenpv</i>   | -1.3971 | 0.0032 |
| 310 | P97333 | Neuropilin-1                                                          | <i>Nrp1</i>    | -1.3964 | 0.0032 |
| 311 | O70152 | Dolichol-phosphate mannosyltransferase subunit 1                      | <i>Dpm1</i>    | -1.3964 | 0.0032 |
| 312 | Q9DCZ1 | GMP reductase 1                                                       | <i>Gmpr</i>    | -1.3918 | 0.0032 |
| 313 | Q8BHS6 | Armadillo repeat-containing X-linked protein 3                        | <i>Armxc3</i>  | -1.3893 | 0.0033 |
| 314 | P83093 | Stromal interaction molecule 2                                        | <i>Stim2</i>   | -1.3864 | 0.0033 |



|     |        |                                                                                                     |                  |         |        |
|-----|--------|-----------------------------------------------------------------------------------------------------|------------------|---------|--------|
| 315 | Q9CQS8 | Protein transport protein Sec61 subunit beta                                                        | <i>Sec61b</i>    | -1.3806 | 0.0033 |
| 316 | Q921P6 | NADH dehydrogenase [ubiquinone] 1 alpha subcomplex subunit 7                                        | <i>Ndufa7</i>    | -1.3792 | 0.0033 |
| 317 | F6SEU4 | Ras/Rap GTPase-activating protein SynGAP                                                            | <i>Syngap1</i>   | -1.3752 | 0.0034 |
| 318 | Q9D1G5 | Leucine-rich repeat-containing protein 57                                                           | <i>Lrrc57</i>    | -1.3750 | 0.0034 |
| 319 | G3XA57 | Rab11 family-interacting protein 2                                                                  | <i>Rab11fip2</i> | -1.3726 | 0.0034 |
| 320 | P16125 | L-lactate dehydrogenase B chain                                                                     | <i>Ldhb</i>      | -1.3674 | 0.0035 |
| 321 | Q8COM9 | Isoaspartyl peptidase/L-asparaginase                                                                | <i>Asrgl1</i>    | -1.3654 | 0.0035 |
| 322 | Q5PR73 | GTP-binding protein Di-Ras2                                                                         | <i>Diras2</i>    | -1.3613 | 0.0035 |
| 323 | Q60866 | Phosphotriesterase-related protein                                                                  | <i>Pter</i>      | -1.3598 | 0.0035 |
| 324 | Q68ED7 | CREB-regulated transcription coactivator 1                                                          | <i>Crtc1</i>     | -1.3598 | 0.0035 |
| 325 | Q8BLR2 | Copine-4                                                                                            | <i>Cpne4</i>     | -1.3581 | 0.0035 |
| 326 | Q8K298 | Anillin                                                                                             | <i>Anln</i>      | -1.3562 | 0.0035 |
| 327 | Q6WQJ1 | Diacylglycerol lipase-alpha                                                                         | <i>Dagla</i>     | -1.3557 | 0.0036 |
| 328 | Q8VE09 | Tetratricopeptide repeat protein 39C                                                                | <i>Ttc39c</i>    | -1.3552 | 0.0036 |
| 329 | Q99L27 | GMP reductase 2                                                                                     | <i>Gmpr2</i>     | -1.3552 | 0.0036 |
| 330 | Q9CPQ1 | Cytochrome c oxidase subunit 6C                                                                     | <i>Cox6c</i>     | -1.3493 | 0.0036 |
| 331 | P56528 | ADP-ribosyl cyclase/cyclic ADP-ribose hydrolase 1                                                   | <i>Cd38</i>      | -1.3485 | 0.0036 |
| 332 | Q60770 | Syntaxin-binding protein 3                                                                          | <i>Stxbp3</i>    | -1.3465 | 0.0036 |
| 333 | Q61166 | Microtubule-associated protein RP/EB family member 1                                                | <i>Mapre1</i>    | -1.3450 | 0.0036 |
| 334 | P61226 | Ras-related protein Rap-2b                                                                          | <i>Rap2b</i>     | -1.3426 | 0.0037 |
| 335 | Q9D7X3 | Dual specificity protein phosphatase 3                                                              | <i>Dusp3</i>     | -1.3419 | 0.0037 |
| 336 | Q8CSW0 | Calmin                                                                                              | <i>Clmn</i>      | -1.3419 | 0.0037 |
| 337 | Q5U5V2 | Hydroxylysine kinase                                                                                | <i>Hykk</i>      | -1.3419 | 0.0037 |
| 338 | Q69238 | Inactive tyrosine-protein kinase PEA1                                                               | <i>Peak1</i>     | -1.3419 | 0.0037 |
| 339 | Q9JM14 | 5'(3')-deoxyribonucleotidase cytosolic type                                                         | <i>Nt5c</i>      | -1.3419 | 0.0037 |
| 340 | Q8BZ17 | DCN1-like protein 2                                                                                 | <i>Dcn1d2</i>    | -1.3419 | 0.0037 |
| 341 | Q9QUQ5 | Short transient receptor potential channel 4                                                        | <i>Trpc4</i>     | -1.3419 | 0.0037 |
| 342 | Q6ZWM4 | U6 snRNA-associated Sm-like protein LSm8                                                            | <i>Lsm8</i>      | -1.3419 | 0.0037 |
| 343 | O08601 | Microsomal triglyceride transfer protein large subunit                                              | <i>Mttp</i>      | -1.3419 | 0.0037 |
| 344 | Q8BJL0 | SWI/SNF-related matrix-associated actin-dependent regulator of chromatin subfamily A-like protein 1 | <i>Smarcal1</i>  | -1.3419 | 0.0037 |
| 345 | P62880 | Guanine nucleotide-binding protein G(I)/G(S)/G(T) subunit beta-2                                    | <i>Gnb2</i>      | -1.3393 | 0.0037 |
| 346 | O54940 | BCL2/adenovirus E1B 19 kDa protein-interacting protein 2                                            | <i>Bnip2</i>     | -1.3374 | 0.0037 |
| 347 | O70325 | Phospholipid hydroperoxide glutathione peroxidase                                                   | <i>Gpx4</i>      | -1.3327 | 0.0039 |
| 348 | Q6WVG3 | BTB/POZ domain-containing protein KCTD12                                                            | <i>Kctd12</i>    | -1.3315 | 0.0040 |
| 349 | Q6NTA4 | Ras-related GTP-binding protein B                                                                   | <i>Rragb</i>     | -1.3307 | 0.0040 |
| 350 | Q6NVE8 | WD repeat-containing protein 44                                                                     | <i>Wdr44</i>     | -1.3277 | 0.0040 |
| 351 | P21447 | ATP-dependent translocase ABCB1                                                                     | <i>Abcb1a</i>    | -1.3214 | 0.0040 |
| 352 | Q9QZ23 | NFU1 iron-sulfur cluster scaffold homolog mitochondrial                                             | <i>Nfu1</i>      | -1.3213 | 0.0040 |
| 353 | P62806 | Histone H4                                                                                          | <i>H4c1</i>      | -1.3134 | 0.0041 |
| 354 | Q9CPV4 | Glyoxalase domain-containing protein 4                                                              | <i>Glod4</i>     | -1.3119 | 0.0042 |
| 355 | P62835 | Ras-related protein Rap-1A                                                                          | <i>Rap1a</i>     | -1.3116 | 0.0042 |
| 356 | E9Q555 | E3 ubiquitin-protein ligase RNF213                                                                  | <i>Rnf213</i>    | -1.3084 | 0.0042 |
| 357 | P10922 | Histone H1.0                                                                                        | <i>H1-0</i>      | -1.3062 | 0.0043 |
| 358 | Q9CXI0 | 2-methoxy-6-polyprenyl-1,4-benzoquinone methylase mitochondrial                                     | <i>Coq5</i>      | -1.3034 | 0.0043 |
| 359 | P01942 | Hemoglobin subunit alpha                                                                            | <i>Hba</i>       | -1.3025 | 0.0043 |
| 360 | P97371 | Proteasome activator complex subunit 1                                                              | <i>Psmc1</i>     | -1.2952 | 0.0044 |
| 361 | Q80U87 | Ubiquitin carboxyl-terminal hydrolase 8                                                             | <i>Usp8</i>      | -1.2946 | 0.0044 |
| 362 | Q3TCN2 | Putative phospholipase B-like 2                                                                     | <i>Plbd2</i>     | -1.2916 | 0.0044 |
| 363 | Q8C1B1 | Calmodulin-regulated spectrin-associated protein 2                                                  | <i>Camsap2</i>   | -1.2915 | 0.0044 |
| 364 | Q5HZI9 | Mitochondrial nicotinamide adenine dinucleotide transporter SLC25A51                                | <i>Slc25a51</i>  | -1.2915 | 0.0044 |
| 365 | P01592 | Immunoglobulin J chain                                                                              | <i>Jchain</i>    | -1.2907 | 0.0044 |
| 366 | P01630 | Ig kappa chain V-II region 7S34.1                                                                   |                  | -1.2907 | 0.0044 |
| 367 | Q8BHI4 | Kelch repeat and BTB domain-containing protein 3                                                    | <i>Kbtbd3</i>    | -1.2907 | 0.0044 |
| 368 | Q8BTF8 | RNA-binding Raly-like protein                                                                       | <i>Raly1</i>     | -1.2907 | 0.0044 |
| 369 | Q99JR6 | Nicotinamide/nicotinic acid mononucleotide adenylyltransferase 3                                    | <i>Nmnat3</i>    | -1.2907 | 0.0044 |
| 370 | Q99J47 | Dehydrogenase/reductase SDR family member 7B                                                        | <i>Dhrs7b</i>    | -1.2905 | 0.0044 |
| 371 | P20152 | Vimentin                                                                                            | <i>Vim</i>       | -1.2902 | 0.0044 |
| 372 | Q9QZD8 | Mitochondrial dicarboxylate carrier                                                                 | <i>Slc25a10</i>  | -1.2881 | 0.0044 |
| 373 | Q9JKC6 | Cell cycle exit and neuronal differentiation protein 1                                              | <i>Cend1</i>     | -1.2870 | 0.0044 |
| 374 | Q8BNW9 | Kelch repeat and BTB domain-containing protein 11                                                   | <i>Kbtbd11</i>   | -1.2861 | 0.0045 |
| 375 | P32261 | Antithrombin-III                                                                                    | <i>Serpinc1</i>  | -1.2849 | 0.0045 |
| 376 | Q91XC9 | Peroxisomal membrane protein PEX16                                                                  | <i>Pex16</i>     | -1.2849 | 0.0045 |
| 377 | P54869 | Hydroxymethylglutaryl-CoA synthase mitochondrial                                                    | <i>Hmgcs2</i>    | -1.2849 | 0.0045 |
| 378 | Q924T2 | 28S ribosomal protein S2 mitochondrial                                                              | <i>Mrps2</i>     | -1.2849 | 0.0045 |
| 379 | Q91YY4 | ATP synthase mitochondrial F1 complex assembly factor 2                                             | <i>Atpaf2</i>    | -1.2849 | 0.0045 |
| 380 | Q9WUP7 | Ubiquitin carboxyl-terminal hydrolase isozyme L5                                                    | <i>Uchl5</i>     | -1.2830 | 0.0045 |
| 381 | Q91VR2 | ATP synthase subunit gamma mitochondrial                                                            | <i>Atp5f1c</i>   | -1.2812 | 0.0045 |
| 382 | Q9D880 | Mitochondrial import inner membrane translocase subunit TIM50                                       | <i>Timm50</i>    | -1.2793 | 0.0045 |
| 383 | P26443 | Glutamate dehydrogenase 1 mitochondrial                                                             | <i>Glud1</i>     | -1.2734 | 0.0046 |
| 384 | Q9ER16 | Retinol dehydrogenase 14                                                                            | <i>Rdh14</i>     | -1.2724 | 0.0046 |
| 385 | Q9QWL7 | Keratin type I cytoskeletal 17                                                                      | <i>Krt17</i>     | -1.2691 | 0.0047 |
| 386 | Q9QYE9 | Pleckstrin homology domain-containing family B member 1                                             | <i>Plekhb1</i>   | -1.2683 | 0.0047 |
| 387 | P05532 | Mast/stem cell growth factor receptor Kit                                                           | <i>Kit</i>       | -1.2677 | 0.0047 |
| 388 | Q8CGP5 | Histone H2A type 1-F                                                                                | <i>Hist1h2af</i> | -1.2674 | 0.0048 |
| 389 | Q8CBW3 | Abl interactor 1                                                                                    | <i>Abi1</i>      | -1.2654 | 0.0048 |
| 390 | Q8R2Y8 | Peptidyl-tRNA hydrolase 2 mitochondrial                                                             | <i>Pthr2</i>     | -1.2623 | 0.0049 |
| 391 | Q9ES46 | Beta-parvin                                                                                         | <i>Parvb</i>     | -1.2623 | 0.0049 |
| 392 | Q8K2T1 | NmrA-like family domain-containing protein 1                                                        | <i>Nmral1</i>    | -1.2615 | 0.0049 |
| 393 | Q9EQ06 | Estradiol 17-beta-dehydrogenase 11                                                                  | <i>Hsd17b11</i>  | -1.2615 | 0.0049 |

|     |        |                                                                            |                   |         |        |
|-----|--------|----------------------------------------------------------------------------|-------------------|---------|--------|
| 394 | Q9DC07 | LIM zinc-binding domain-containing Nebulette                               | <i>Neb1</i>       | -1.2582 | 0.0049 |
| 395 | P18242 | Cathepsin D                                                                | <i>Ctsd</i>       | -1.2579 | 0.0049 |
| 396 | P68368 | Tubulin alpha-4A chain                                                     | <i>Tuba4a</i>     | -1.2559 | 0.0049 |
| 397 | Q8CHU3 | Epsin-2                                                                    | <i>Epn2</i>       | -1.2545 | 0.0050 |
| 398 | Q8JZL3 | Thiamine-triphosphatase                                                    | <i>Thtpa</i>      | -1.2528 | 0.0050 |
| 399 | P70280 | Vesicle-associated membrane protein 7                                      | <i>Vamp7</i>      | -1.2528 | 0.0050 |
| 400 | Q8BU31 | Ras-related protein Rap-2c                                                 | <i>Rap2c</i>      | -1.2501 | 0.0050 |
| 401 | Q8CGP7 | Histone H2A type 1-K                                                       | <i>H2ac15</i>     | -1.2491 | 0.0050 |
| 402 | P39053 | Dynamin-1                                                                  | <i>Dnm1</i>       | -1.2465 | 0.0050 |
| 403 | P05214 | Tubulin alpha-3 chain                                                      | <i>Tuba3a</i>     | -1.2454 | 0.0050 |
| 404 | A1L317 | Keratin type I cytoskeletal 24                                             | <i>Krt24</i>      | -1.2434 | 0.0050 |
| 405 | Q9Z2M6 | Ubiquitin-like protein 3                                                   | <i>Ubl3</i>       | -1.2421 | 0.0050 |
| 406 | P40237 | CD82 antigen                                                               | <i>Cd82</i>       | -1.2398 | 0.0051 |
| 407 | P18525 | Ig heavy chain V region 5-84                                               |                   | -1.2360 | 0.0052 |
| 408 | Q9D0K0 | TBC1 domain family member 7                                                | <i>Tbc1d7</i>     | -1.2360 | 0.0052 |
| 409 | Q8COD4 | Rho GTPase-activating protein 12                                           | <i>Arhgap12</i>   | -1.2360 | 0.0052 |
| 410 | Q8BWW4 | Metallo-beta-lactamase domain-containing protein 1                         | <i>Mblac1</i>     | -1.2360 | 0.0052 |
| 411 | Q6SKR2 | Methyltransferase N6AMT1                                                   | <i>N6amt1</i>     | -1.2360 | 0.0052 |
| 412 | Q810B9 | SLIT and NTRK-like protein 3                                               | <i>Slitrk3</i>    | -1.2360 | 0.0052 |
| 413 | Q9CQX0 | Ubiquitin thioesterase OTUB2                                               | <i>Otub2</i>      | -1.2360 | 0.0052 |
| 414 | Q69ZH9 | Rho GTPase-activating protein 23                                           | <i>Arhgap23</i>   | -1.2349 | 0.0053 |
| 415 | Q4V9Z5 | Seizure 6-like protein 2                                                   | <i>Sez6l2</i>     | -1.2254 | 0.0054 |
| 416 | Q8R4U7 | Leucine zipper protein 1                                                   | <i>Luzp1</i>      | -1.2238 | 0.0055 |
| 417 | Q62425 | Cytochrome c oxidase subunit NDUFA4                                        | <i>Ndufa4</i>     | -1.2219 | 0.0055 |
| 418 | Q61781 | Keratin type I cytoskeletal 14                                             | <i>Krt14</i>      | -1.2215 | 0.0055 |
| 419 | Q9JIK9 | 28S ribosomal protein S34 mitochondrial                                    | <i>Mrps34</i>     | -1.2178 | 0.0057 |
| 420 | Q8CIQ7 | Dedicator of cytokinesis protein 3                                         | <i>Dock3</i>      | -1.2159 | 0.0057 |
| 421 | P46471 | 26S proteasome regulatory subunit 7                                        | <i>Psmc2</i>      | -1.2147 | 0.0057 |
| 422 | Q9JI91 | Alpha-actinin-2                                                            | <i>Actn2</i>      | -1.2137 | 0.0057 |
| 423 | Q8BLY3 | Leucine-rich repeat and fibronectin type-III domain-containing protein 3   | <i>Lfrn3</i>      | -1.2107 | 0.0058 |
| 424 | Q8BWR2 | PITH domain-containing protein 1                                           | <i>Pithd1</i>     | -1.2102 | 0.0058 |
| 425 | P49070 | Guided entry of tail-anchored proteins factor CAMLG                        | <i>Camlg</i>      | -1.2041 | 0.0059 |
| 426 | P01633 | Ig kappa chain V19-17                                                      | <i>Igk-V19-17</i> | -1.2041 | 0.0059 |
| 427 | P28474 | Alcohol dehydrogenase class-3                                              | <i>Adh5</i>       | -1.2032 | 0.0059 |
| 428 | P17427 | AP-2 complex subunit alpha-2                                               | <i>Ap2a2</i>      | -1.2021 | 0.0059 |
| 429 | Q8VHW2 | Voltage-dependent calcium channel gamma-8 subunit                          | <i>Cacng8</i>     | -1.2011 | 0.0059 |
| 430 | Q3UV17 | Keratin type II cytoskeletal 2 oral                                        | <i>Krt76</i>      | -1.2005 | 0.0059 |
| 431 | P56391 | Cytochrome c oxidase subunit 6B1                                           | <i>Cox6b1</i>     | -1.2000 | 0.0060 |
| 432 | Q91VH6 | Protein MEMO1                                                              | <i>Memo1</i>      | -1.1977 | 0.0060 |
| 433 | P35278 | Ras-related protein Rab-5C                                                 | <i>Rab5c</i>      | -1.1968 | 0.0060 |
| 434 | Q9CX00 | IST1 homolog                                                               | <i>Ist1</i>       | -1.1948 | 0.0060 |
| 435 | P35276 | Ras-related protein Rab-3D                                                 | <i>Rab3d</i>      | -1.1946 | 0.0060 |
| 436 | Q8K0T0 | Reticulon-1                                                                | <i>Rtn1</i>       | -1.1932 | 0.0060 |
| 437 | Q70194 | Eukaryotic translation initiation factor 3 subunit D                       | <i>Eif3d</i>      | -1.1870 | 0.0071 |
| 438 | O35066 | Kinesin-like protein KIF3C                                                 | <i>Kif3c</i>      | -1.1870 | 0.0071 |
| 439 | Q80U19 | Disheveled-associated activator of morphogenesis 2                         | <i>Daam2</i>      | -1.1870 | 0.0071 |
| 440 | P23953 | Carboxylesterase 1C                                                        | <i>Ces1c</i>      | -1.1870 | 0.0071 |
| 441 | Q9CPT3 | N-acylneuraminate-9-phosphatase                                            | <i>Nanp</i>       | -1.1870 | 0.0071 |
| 442 | P06909 | Complement factor H                                                        | <i>Cfh</i>        | -1.1861 | 0.0071 |
| 443 | Q9DAS9 | Guanine nucleotide-binding protein G(I)/G(S)/G(O) subunit gamma-12         | <i>Gng12</i>      | -1.1861 | 0.0071 |
| 444 | Q8R0P4 | Mth938 domain-containing protein                                           | <i>Aamdc</i>      | -1.1861 | 0.0071 |
| 445 | P35282 | Ras-related protein Rab-21                                                 | <i>Rab21</i>      | -1.1852 | 0.0072 |
| 446 | Q80YA9 | Connector enhancer of kinase suppressor of ras 2                           | <i>Cnksr2</i>     | -1.1796 | 0.0075 |
| 447 | Q504M8 | Ras-related protein Rab-26                                                 | <i>Rab26</i>      | -1.1794 | 0.0075 |
| 448 | Q6ZQI3 | Malectin                                                                   | <i>Mlec</i>       | -1.1778 | 0.0075 |
| 449 | O70503 | Very-long-chain 3-oxoacyl-CoA reductase                                    | <i>Hsd17b12</i>   | -1.1762 | 0.0075 |
| 450 | P27671 | Ras-specific guanine nucleotide-releasing factor 1                         | <i>Rasgrf1</i>    | -1.1752 | 0.0076 |
| 451 | Q8R5I6 | Glutathione S-transferase Mu 4                                             | <i>Gstm4</i>      | -1.1751 | 0.0076 |
| 452 | Q3UFT3 | GRB2-associated and regulator of MAPK protein                              | <i>Garem1</i>     | -1.1741 | 0.0076 |
| 453 | P97785 | GDNF family receptor alpha-1                                               | <i>Gfra1</i>      | -1.1741 | 0.0076 |
| 454 | Q8BML1 | [F-actin]-monooxygenase MICAL2                                             | <i>Mical2</i>     | -1.1741 | 0.0076 |
| 455 | P27046 | Alpha-mannosidase 2                                                        | <i>Man2a1</i>     | -1.1741 | 0.0076 |
| 456 | Q99LN9 | Deoxyhypusine hydroxylase                                                  | <i>Dohh</i>       | -1.1741 | 0.0076 |
| 457 | Q505B7 | Protein archease                                                           | <i>Zbtb8os</i>    | -1.1741 | 0.0076 |
| 458 | P70451 | Tyrosine-protein kinase Fer                                                | <i>Fer</i>        | -1.1741 | 0.0076 |
| 459 | Q9R0E1 | Multifunctional procollagen lysine hydroxylase and glycosyltransferase LH3 | <i>Plod3</i>      | -1.1741 | 0.0076 |
| 460 | P70245 | 3-beta-hydroxysteroid-Delta(8) Delta(7)-isomerase                          | <i>Ebp</i>        | -1.1741 | 0.0076 |
| 461 | Q3U3W5 | Protein arginine N-methyltransferase 9                                     | <i>Prmt9</i>      | -1.1741 | 0.0076 |
| 462 | P68404 | Protein kinase C beta type                                                 | <i>Prkcb</i>      | -1.1734 | 0.0076 |
| 463 | O35393 | Ephrin-B3                                                                  | <i>Efnb3</i>      | -1.1734 | 0.0076 |
| 464 | Q9JLZ3 | Methylglutaconyl-CoA hydratase mitochondrial                               | <i>Auh</i>        | -1.1727 | 0.0076 |
| 465 | Q6P069 | Sorcini                                                                    | <i>Sri</i>        | -1.1714 | 0.0076 |
| 466 | Q9CQW1 | Synaptobrevin homolog YKT6                                                 | <i>Ykt6</i>       | -1.1704 | 0.0077 |
| 467 | Q3TUH1 | Phosphatidate cytidyltransferase mitochondrial                             | <i>Tamm41</i>     | -1.1660 | 0.0078 |
| 468 | Q9QXX4 | Calcium-binding mitochondrial carrier protein Aralar2                      | <i>Slc25a13</i>   | -1.1655 | 0.0078 |
| 469 | Q11011 | Puromycin-sensitive aminopeptidase                                         | <i>Npepps</i>     | -1.1644 | 0.0078 |
| 470 | Q8K0Z7 | Translational activator of cytochrome c oxidase 1                          | <i>Taco1</i>      | -1.1631 | 0.0078 |
| 471 | P13707 | Glycerol-3-phosphate dehydrogenase [NAD(+)] cytoplasmic                    | <i>Gpd1</i>       | -1.1608 | 0.0079 |
| 472 | Q9WVK4 | EH domain-containing protein 1                                             | <i>Ehd1</i>       | -1.1582 | 0.0080 |

|     |        |                                                                            |                  |         |        |
|-----|--------|----------------------------------------------------------------------------|------------------|---------|--------|
| 473 | Q3UHB8 | Coiled-coil domain-containing protein 177                                  | <i>Ccdc177</i>   | -1.1581 | 0.0080 |
| 474 | Q9WTS4 | Teneurin-1                                                                 | <i>Tenn1</i>     | -1.1553 | 0.0081 |
| 475 | Q3UUI3 | Acyl-coenzyme A thioesterase THEM4                                         | <i>Them4</i>     | -1.1551 | 0.0081 |
| 476 | Q06138 | Calcium-binding protein 39                                                 | <i>Cab39</i>     | -1.1547 | 0.0082 |
| 477 | P50396 | Rab GDP dissociation inhibitor alpha                                       | <i>Gdi1</i>      | -1.1545 | 0.0082 |
| 478 | Q9CS42 | Ribose-phosphate pyrophosphokinase 2                                       | <i>Prps2</i>     | -1.1476 | 0.0083 |
| 479 | Q6PEE3 | Ribonucleoside-diphosphate reductase subunit M2 B                          | <i>Rrm2b</i>     | -1.1453 | 0.0083 |
| 480 | Q91WP6 | Serine protease inhibitor A3N                                              | <i>Serpina3n</i> | -1.1406 | 0.0084 |
| 481 | Q6PHN9 | Ras-related protein Rab-35                                                 | <i>Rab35</i>     | -1.1353 | 0.0085 |
| 482 | P42125 | Enoyl-CoA delta isomerase 1 mitochondrial                                  | <i>Eci1</i>      | -1.1344 | 0.0086 |
| 483 | Q91ZA3 | Propionyl-CoA carboxylase alpha chain mitochondrial                        | <i>Pcca</i>      | -1.1333 | 0.0086 |
| 484 | Q99PT1 | Rho GDP-dissociation inhibitor 1                                           | <i>Arhgdia</i>   | -1.1333 | 0.0086 |
| 485 | Q9WUE3 | Transmembrane reductase CYB561D2                                           | <i>Cyb561d2</i>  | -1.1332 | 0.0086 |
| 486 | P61022 | Calcineurin B homologous protein 1                                         | <i>Chp1</i>      | -1.1330 | 0.0086 |
| 487 | Q8BZM1 | Glomulin                                                                   | <i>Glmn</i>      | -1.1330 | 0.0086 |
| 488 | Q35450 | FK506-binding protein-like                                                 | <i>Fkbpl</i>     | -1.1330 | 0.0086 |
| 489 | Q3UHF7 | Transcription factor HIVEP2                                                | <i>Hivep2</i>    | -1.1330 | 0.0086 |
| 490 | Q9CRC9 | Glucosamine-6-phosphate isomerase 2                                        | <i>Gnpda2</i>    | -1.1329 | 0.0086 |
| 491 | Q9D023 | Mitochondrial pyruvate carrier 2                                           | <i>Mpc2</i>      | -1.1318 | 0.0086 |
| 492 | Q4KUS2 | Protein unc-13 homolog A                                                   | <i>Unc13a</i>    | -1.1300 | 0.0089 |
| 493 | O70443 | Guanine nucleotide-binding protein (Gz) subunit alpha                      | <i>Gnaz</i>      | -1.1300 | 0.0089 |
| 494 | Q60631 | Growth factor receptor-bound protein 2                                     | <i>Grb2</i>      | -1.1276 | 0.0089 |
| 495 | P01635 | Ig kappa chain V-V region K2 (Fragment)                                    |                  | -1.1253 | 0.0090 |
| 496 | Q9CWU6 | Ubiquinol-cytochrome-c reductase complex assembly factor 1                 | <i>Uqcc1</i>     | -1.1253 | 0.0090 |
| 497 | Q8BJY1 | 26S proteasome non-ATPase regulatory subunit 5                             | <i>Psm5</i>      | -1.1227 | 0.0090 |
| 498 | Q3UVC0 | Kinase suppressor of Ras 2                                                 | <i>Ksr2</i>      | -1.1222 | 0.0090 |
| 499 | Q99JY4 | TraB domain-containing protein                                             | <i>Trabd</i>     | -1.1222 | 0.0090 |
| 500 | Q8BKR5 | Protein phosphatase 1 regulatory subunit 37                                | <i>Ppp1r37</i>   | -1.1222 | 0.0090 |
| 501 | Q9CQF3 | Cleavage and polyadenylation specificity factor subunit 5                  | <i>Nudt21</i>    | -1.1216 | 0.0091 |
| 502 | Q9CQ86 | Migration and invasion enhancer 1                                          | <i>Mien1</i>     | -1.1194 | 0.0091 |
| 503 | Q5SQM0 | Echinoderm microtubule-associated protein-like 6                           | <i>Eml6</i>      | -1.1194 | 0.0091 |
| 504 | Q9R013 | Cathepsin F                                                                | <i>Ctsf</i>      | -1.1194 | 0.0091 |
| 505 | Q8BP47 | Asparagine--tRNA ligase cytoplasmic                                        | <i>NARS1</i>     | -1.1191 | 0.0091 |
| 506 | P62962 | Profilin-1                                                                 | <i>Pfn1</i>      | -1.1173 | 0.0092 |
| 507 | Q9CQZ6 | NADH dehydrogenase [ubiquinone] 1 beta subcomplex subunit 3                | <i>Ndufb3</i>    | -1.1151 | 0.0093 |
| 508 | O88384 | Vesicle transport through interaction with t-SNAREs homolog 1B             | <i>Vti1b</i>     | -1.1137 | 0.0093 |
| 509 | Q9CPP6 | NADH dehydrogenase [ubiquinone] 1 alpha subcomplex subunit 5               | <i>Ndufa5</i>    | -1.1137 | 0.0093 |
| 510 | Q8K021 | Secretory carrier-associated membrane protein 1                            | <i>Scamp1</i>    | -1.1134 | 0.0093 |
| 511 | P05201 | Aspartate aminotransferase cytoplasmic                                     | <i>Got1</i>      | -1.1113 | 0.0093 |
| 512 | Q9QZD9 | Eukaryotic translation initiation factor 3 subunit I                       | <i>Eif3i</i>     | -1.1112 | 0.0093 |
| 513 | P47199 | Quinone oxidoreductase                                                     | <i>Cryz</i>      | -1.1087 | 0.0094 |
| 514 | Q9JK23 | Proteasome assembly chaperone 1                                            | <i>Psmg1</i>     | -1.1087 | 0.0094 |
| 515 | Q9JKX6 | ADP-sugar pyrophosphatase                                                  | <i>Nudt5</i>     | -1.1087 | 0.0094 |
| 516 | Q9QZ06 | Toll-interacting protein                                                   | <i>Tollip</i>    | -1.1087 | 0.0094 |
| 517 | Q9Z2R6 | Protein unc-119 homolog A                                                  | <i>Unc119</i>    | -1.1085 | 0.0094 |
| 518 | Q35988 | Syndecan-4                                                                 | <i>Sdc4</i>      | -1.1084 | 0.0094 |
| 519 | Q3TKT4 | Transcription activator BRG1                                               | <i>Smarca4</i>   | -1.1084 | 0.0094 |
| 520 | Q91XF0 | Pyridoxine-5'-phosphate oxidase                                            | <i>Pnpo</i>      | -1.1084 | 0.0094 |
| 521 | Q9D7G0 | Ribose-phosphate pyrophosphokinase 1                                       | <i>Prps1</i>     | -1.1084 | 0.0094 |
| 522 | Q8BFY6 | Peflin                                                                     | <i>Pef1</i>      | -1.1082 | 0.0094 |
| 523 | Q9RON7 | Synaptotagmin-7                                                            | <i>Syt7</i>      | -1.1069 | 0.0094 |
| 524 | Q80UG2 | Plexin-A4                                                                  | <i>Plxna4</i>    | -1.1048 | 0.0097 |
| 525 | Q9DC69 | NADH dehydrogenase [ubiquinone] 1 alpha subcomplex subunit 9 mitochondrial | <i>Ndufa9</i>    | -1.1035 | 0.0098 |
| 526 | Q92511 | ATPase family AAA domain-containing protein 3                              | <i>Atad3</i>     | -1.1014 | 0.0098 |
| 527 | P62821 | Ras-related protein Rab-1A                                                 | <i>Rab1A</i>     | -1.1004 | 0.0099 |
| 528 | P12960 | Contactin-1                                                                | <i>Cntn1</i>     | -1.0993 | 0.0099 |
| 529 | Q8BHW2 | Protein CP1                                                                | <i>Oscp1</i>     | -1.0987 | 0.0099 |
| 530 | Q35381 | Acidic leucine-rich nuclear phosphoprotein 32 family member A              | <i>Anp32a</i>    | -1.0987 | 0.0099 |
| 531 | Q60900 | ELAV-like protein 3                                                        | <i>Elavl3</i>    | -1.0976 | 0.0100 |
| 532 | Q922Q1 | Mitochondrial amidoxime reducing component 2                               | <i>Mtarc2</i>    | -1.0976 | 0.0100 |
| 533 | Q6PER3 | Microtubule-associated protein RP/EB family member 3                       | <i>Mapre3</i>    | -1.0972 | 0.0100 |
| 534 | Q78IK4 | MIC complex subunit Mic27                                                  | <i>Apoal</i>     | -1.0968 | 0.0100 |
| 535 | Q9CPRS | 39S ribosomal protein L15 mitochondrial                                    | <i>Mrpl15</i>    | -1.0929 | 0.0101 |
| 536 | Q3TES0 | IQ motif and SEC7 domain-containing protein 3                              | <i>Iqsec3</i>    | -1.0920 | 0.0101 |
| 537 | P63024 | Vesicle-associated membrane protein 3                                      | <i>Vamp3</i>     | -1.0909 | 0.0102 |
| 538 | Q9ZOR6 | Intersectin-2                                                              | <i>Its2</i>      | -1.0905 | 0.0102 |
| 539 | P35550 | rRNA 2'-O-methyltransferase fibrillar                                      | <i>Fbl</i>       | -1.0849 | 0.0103 |
| 540 | P68510 | 14-3-3 protein eta                                                         | <i>Ywhah</i>     | -1.0846 | 0.0103 |
| 541 | Q8QZS1 | 3-hydroxyisobutyryl-CoA hydrolase mitochondrial                            | <i>Hibch</i>     | -1.0813 | 0.0105 |
| 542 | P97820 | Mitogen-activated protein kinase kinase kinase 4                           | <i>Map4k4</i>    | -1.0803 | 0.0105 |
| 543 | Q8BP40 | Lysophosphatidic acid phosphatase type 6                                   | <i>Acp6</i>      | -1.0798 | 0.0105 |
| 544 | Q9CQE8 | RNA transcription translation and transport factor protein                 | <i>RTRAF</i>     | -1.0798 | 0.0105 |
| 545 | Q9ROQ9 | Mannose-P-dolichol utilization defect 1 protein                            | <i>Mpdu1</i>     | -1.0787 | 0.0105 |
| 546 | P62317 | Small nuclear ribonucleoprotein Sm D2                                      | <i>Snrpd2</i>    | -1.0779 | 0.0106 |
| 547 | Q8COL0 | Thioredoxin-related transmembrane protein 4                                | <i>Tmx4</i>      | -1.0758 | 0.0106 |
| 548 | Q91X72 | Hemopexin                                                                  | <i>Hpx</i>       | -1.0726 | 0.0107 |
| 549 | Q8BR92 | Paralemmin-2                                                               | <i>Palm2</i>     | -1.0687 | 0.0121 |
| 550 | Q8BZA9 | Fructose-2,6-bisphosphatase TIGAR                                          | <i>Tigar</i>     | -1.0665 | 0.0122 |
| 551 | Q9ROL7 | A-kinase anchor protein 8-like                                             | <i>Akap8l</i>    | -1.0665 | 0.0122 |

|     |        |                                                                        |                   |         |        |
|-----|--------|------------------------------------------------------------------------|-------------------|---------|--------|
| 552 | P14847 | C-reactive protein                                                     | <i>Crp</i>        | -1.0665 | 0.0122 |
| 553 | Q9D0P8 | Intraflagellar transport protein 27 homolog                            | <i>Ift27</i>      | -1.0665 | 0.0122 |
| 554 | Q61016 | Guanine nucleotide-binding protein G(I)/G(S)/G(O) subunit gamma-7      | <i>Gng7</i>       | -1.0665 | 0.0122 |
| 555 | P56812 | Programmed cell death protein 5                                        | <i>Pdcd5</i>      | -1.0665 | 0.0122 |
| 556 | P01639 | Ig kappa chain V-V region MOPC 41                                      | <i>Gm5571</i>     | -1.0665 | 0.0122 |
| 557 | P35831 | Tyrosine-protein phosphatase non-receptor type 12                      | <i>Ptpn12</i>     | -1.0665 | 0.0122 |
| 558 | P01786 | Ig heavy chain V region MOPC 47A                                       |                   | -1.0665 | 0.0122 |
| 559 | Q80XC2 | tRNA (adenine(58)-N(1))-methyltransferase catalytic subunit TRMT61A    | <i>Trmt61a</i>    | -1.0665 | 0.0122 |
| 560 | Q91ZW2 | GDP-fucose protein O-fucosyltransferase 1                              | <i>Pofut1</i>     | -1.0665 | 0.0122 |
| 561 | Q8BQZ5 | Cleavage and polyadenylation specificity factor subunit 4              | <i>Cpsf4</i>      | -1.0665 | 0.0122 |
| 562 | Q9CZJ0 | Metallophosphoesterase MPPED2                                          | <i>Mpped2</i>     | -1.0665 | 0.0122 |
| 563 | Q91ZG2 | Metallophosphoesterase domain-containing protein 1                     | <i>Mpped1</i>     | -1.0665 | 0.0122 |
| 564 | Q9R0G7 | Zinc finger E-box-binding homeobox 2                                   | <i>Zeb2</i>       | -1.0665 | 0.0122 |
| 565 | Q7TQA1 | Immunoglobulin superfamily member 1                                    | <i>Igsf1</i>      | -1.0665 | 0.0122 |
| 566 | Q62087 | Serum paraoxonase/lactonase 3                                          | <i>Pon3</i>       | -1.0665 | 0.0122 |
| 567 | P01632 | Ig kappa chain V-I region S107A                                        | <i>Igkv7-33</i>   | -1.0665 | 0.0122 |
| 568 | P01657 | Ig kappa chain V-III region PC 2413                                    |                   | -1.0665 | 0.0122 |
| 569 | P01634 | Ig kappa chain V-V region MOPC 21                                      |                   | -1.0665 | 0.0122 |
| 570 | P61014 | Cardiac phospholamban                                                  | <i>Pln</i>        | -1.0665 | 0.0122 |
| 571 | Q8VEG6 | CCR4-NOT transcription complex subunit 6-like                          | <i>Cnot6l</i>     | -1.0665 | 0.0122 |
| 572 | P06328 | Ig heavy chain V region 1-72                                           | <i>Ighv1-72</i>   | -1.0665 | 0.0122 |
| 573 | P01754 | Ig heavy chain V region 1-62-3                                         | <i>Ighv1-62-3</i> | -1.0665 | 0.0122 |
| 574 | P01753 | Ig heavy chain V region 186-1                                          | <i>4 SV</i>       | -1.0665 | 0.0122 |
| 575 | Q76KF0 | Semaphorin-6D                                                          | <i>Sema6d</i>     | -1.0665 | 0.0122 |
| 576 | Q8VBY2 | Calcium/calmodulin-dependent protein kinase kinase 1                   | <i>Camkk1</i>     | -1.0653 | 0.0122 |
| 577 | P0C8K7 | Small integral membrane protein 1                                      | <i>Smim1</i>      | -1.0651 | 0.0122 |
| 578 | Q9R118 | Serine protease HTRA1                                                  | <i>Htra1</i>      | -1.0646 | 0.0122 |
| 579 | O08709 | Peroxisomal protein 6                                                  | <i>Pdx6</i>       | -1.0642 | 0.0123 |
| 580 | Q62465 | Synaptic vesicle membrane protein VAT-1 homolog                        | <i>Vat1</i>       | -1.0609 | 0.0124 |
| 581 | Q9DB25 | Dolichyl-phosphate beta-glucosyltransferase                            | <i>Alg5</i>       | -1.0606 | 0.0124 |
| 582 | Q8R4F1 | Netrin-G2                                                              | <i>Ntng2</i>      | -1.0603 | 0.0125 |
| 583 | Q922J3 | CAP-Gly domain-containing linker protein 1                             | <i>Clip1</i>      | -1.0601 | 0.0125 |
| 584 | P61264 | Syntaxin-1B                                                            | <i>Stx1b</i>      | -1.0579 | 0.0126 |
| 585 | Q3UHD9 | Arf-GAP with GTPase ANK repeat and PH domain-containing protein 2      | <i>Agap2</i>      | -1.0536 | 0.0127 |
| 586 | P27048 | Small nuclear ribonucleoprotein-associated protein B                   | <i>Snrpb</i>      | -1.0533 | 0.0127 |
| 587 | Q9R1V6 | Disintegrin and metalloproteinase domain-containing protein 22         | <i>Adam22</i>     | -1.0523 | 0.0128 |
| 588 | O55234 | Proteasome subunit beta type-5                                         | <i>Psmb5</i>      | -1.0493 | 0.0130 |
| 589 | P0DP60 | Ly-6/neurotoxin-like protein 1                                         | <i>Lynx1</i>      | -1.0488 | 0.0131 |
| 590 | P56564 | Excitatory amino acid transporter 1                                    | <i>Slc1a3</i>     | -1.0480 | 0.0131 |
| 591 | P00493 | Hypoxanthine-guanine phosphoribosyltransferase                         | <i>Hprt1</i>      | -1.0439 | 0.0132 |
| 592 | Q91YJ3 | Thymocyte nuclear protein 1                                            | <i>Thyn1</i>      | -1.0431 | 0.0132 |
| 593 | Q9DBG5 | Perilipin-3                                                            | <i>Plin3</i>      | -1.0428 | 0.0132 |
| 594 | O08992 | Syntenin-1                                                             | <i>Sdcbp</i>      | -1.0428 | 0.0132 |
| 595 | Q9CXZ1 | NADH dehydrogenase [ubiquinone] iron-sulfur protein 4 mitochondrial    | <i>Ndufs4</i>     | -1.0428 | 0.0132 |
| 596 | Q9CPU0 | Lactoylglutathione lyase                                               | <i>Glo1</i>       | -1.0414 | 0.0133 |
| 597 | Q8BTH8 | Casein kinase I isoform gamma-1                                        | <i>Csnk1g1</i>    | -1.0397 | 0.0133 |
| 598 | Q8CH25 | SAFB-like transcription modulator                                      | <i>Sltm</i>       | -1.0393 | 0.0133 |
| 599 | P02089 | Hemoglobin subunit beta-2                                              | <i>Hbb-b2</i>     | -1.0380 | 0.0135 |
| 600 | O35409 | Glutamate carboxypeptidase 2                                           | <i>Folh1</i>      | -1.0377 | 0.0135 |
| 601 | P61294 | Ras-related protein Rab-6B                                             | <i>Rab6b</i>      | -1.0376 | 0.0135 |
| 602 | P62715 | Serine/threonine-protein phosphatase 2A catalytic subunit beta isoform | <i>Ppp2cb</i>     | -1.0362 | 0.0135 |
| 603 | Q8C2E7 | WASH complex subunit 5                                                 | <i>Washc5</i>     | -1.0342 | 0.0135 |
| 604 | P10639 | Thioredoxin                                                            | <i>Txn</i>        | -1.0335 | 0.0136 |
| 605 | Q8VDD8 | WASH complex subunit 1                                                 | <i>Washc1</i>     | -1.0333 | 0.0136 |
| 606 | Q9WVQ5 | Methylthioribulose-1-phosphate dehydratase                             | <i>Apip</i>       | -1.0330 | 0.0136 |
| 607 | Q9CQV7 | Mitochondrial import inner membrane translocase subunit TIM14          | <i>Dnajc19</i>    | -1.0330 | 0.0136 |
| 608 | Q8VCC8 | Rap guanine nucleotide exchange factor 3                               | <i>Rapgef3</i>    | -1.0330 | 0.0136 |
| 609 | P46660 | Alpha-interneixin                                                      | <i>Ina</i>        | -1.0325 | 0.0136 |
| 610 | Q9QZ88 | Vacuolar protein sorting-associated protein 29                         | <i>Vps29</i>      | -1.0319 | 0.0136 |
| 611 | P62484 | Abl interactor 2                                                       | <i>Abi2</i>       | -1.0314 | 0.0137 |
| 612 | Q8BHC1 | Ras-related protein Rab-39B                                            | <i>Rab39b</i>     | -1.0300 | 0.0137 |
| 613 | P63216 | Guanine nucleotide-binding protein G(I)/G(S)/G(O) subunit gamma-3      | <i>Gng3</i>       | -1.0286 | 0.0137 |
| 614 | Q61102 | Iron-sulfur clusters transporter ABCB7 mitochondrial                   | <i>Abcb7</i>      | -1.0283 | 0.0138 |
| 615 | P28660 | Nck-associated protein 1                                               | <i>Nckap1</i>     | -1.0278 | 0.0138 |
| 616 | Q9CXJ1 | Probable glutamate--tRNA ligase mitochondrial                          | <i>Ears2</i>      | -1.0245 | 0.0139 |
| 617 | Q8K097 | Protein lifeguard 2                                                    | <i>Faim2</i>      | -1.0245 | 0.0139 |
| 618 | B0F2B4 | Neurologin 4-like                                                      | <i>Nlgn4l</i>     | -1.0245 | 0.0139 |
| 619 | Q62422 | Osteoclast-stimulating factor 1                                        | <i>Ostf1</i>      | -1.0245 | 0.0139 |
| 620 | P01647 | Ig kappa chain V-V region HP 124E1                                     |                   | -1.0245 | 0.0139 |
| 621 | P01645 | Ig kappa chain V-V region HP 93G7                                      |                   | -1.0245 | 0.0139 |
| 622 | P01644 | Ig kappa chain V-V region HP R16.7                                     |                   | -1.0245 | 0.0139 |
| 623 | P01648 | Ig kappa chain V-V region HP 91A3                                      |                   | -1.0245 | 0.0139 |
| 624 | Q64433 | 10 kDa heat shock protein mitochondrial                                | <i>Hspe1</i>      | -1.0239 | 0.0139 |
| 625 | P19253 | 60S ribosomal protein L13a                                             | <i>Rpl13a</i>     | -1.0226 | 0.0139 |
| 626 | P35279 | Ras-related protein Rab-6A                                             | <i>Rab6a</i>      | -1.0225 | 0.0139 |
| 627 | Q78IK2 | ATP synthase membrane subunit K mitochondrial                          | <i>Atp5mk</i>     | -1.0218 | 0.0140 |
| 628 | Q9Z2V6 | Histone deacetylase 5                                                  | <i>Hdac5</i>      | -1.0213 | 0.0140 |
| 629 | Q9CZH3 | Proteasome assembly chaperone 3                                        | <i>Psmg3</i>      | -1.0213 | 0.0140 |
| 630 | Q9Z2A0 | 3-phosphoinositide-dependent protein kinase 1                          | <i>Pdpk1</i>      | -1.0208 | 0.0140 |

|     |        |                                                                              |          |         |        |
|-----|--------|------------------------------------------------------------------------------|----------|---------|--------|
| 631 | Q62059 | Versican core protein                                                        | Vcan     | -1.0185 | 0.0142 |
| 632 | Q9QY8  | Spastin                                                                      | Spast    | -1.0181 | 0.0142 |
| 633 | Q9DB50 | AP-1 complex subunit sigma-2                                                 | Ap1s2    | -1.0181 | 0.0142 |
| 634 | Q9CXT8 | Mitochondrial-processing peptidase subunit beta                              | Pmpcb    | -1.0173 | 0.0142 |
| 635 | Q9JKB1 | Ubiquitin carboxyl-terminal hydrolase isozyme L3                             | Uchl3    | -1.0144 | 0.0143 |
| 636 | P62631 | Elongation factor 1-alpha 2                                                  | Eef1a2   | -1.0099 | 0.0145 |
| 637 | B1AXV0 | DOMON domain-containing protein FRRS1L                                       | Frrs1l   | -1.0077 | 0.0146 |
| 638 | P47911 | 60S ribosomal protein L6                                                     | Rpl6     | -1.0071 | 0.0146 |
| 639 | Q91ZR1 | Ras-related protein Rab-4B                                                   | Rab4b    | -1.0050 | 0.0147 |
| 640 | P62077 | Mitochondrial import inner membrane translocase subunit Tim8 B               | Timm8b   | -1.0044 | 0.0148 |
| 641 | A2AGL3 | Ryanodine receptor 3                                                         | Ryr3     | -1.0023 | 0.0149 |
| 642 | Q9Z280 | Phospholipase D1                                                             | Pld1     | -1.0014 | 0.0149 |
| 643 | P53026 | 60S ribosomal protein L10a                                                   | Rpl10a   | -1.0006 | 0.0150 |
| 644 | Q3UMF0 | Cordon-bleu protein-like 1                                                   | Cobl1    | -0.9995 | 0.0150 |
| 645 | Q8R238 | Serine dehydratase-like                                                      | Sdsl     | -0.9995 | 0.0150 |
| 646 | Q9D0B0 | Serine/arginine-rich splicing factor 9                                       | Srsf9    | -0.9995 | 0.0150 |
| 647 | Q8BK75 | Elongator complex protein 6                                                  | Elp6     | -0.9995 | 0.0150 |
| 648 | Q9VWA2 | Mitochondrial import inner membrane translocase subunit Tim8 A               | Timm8a1  | -0.9995 | 0.0150 |
| 649 | Q9JME7 | Trafficking protein particle complex subunit 2-like protein                  | Trappc2l | -0.9995 | 0.0150 |
| 650 | Q60932 | Voltage-dependent anion-selective channel protein 1                          | Vdac1    | -0.9974 | 0.0150 |
| 651 | A2AJA9 | Apical junction component 1 homolog                                          | Ajm1     | -0.9966 | 0.0151 |
| 652 | P57784 | U2 small nuclear ribonucleoprotein A'                                        | Snrpa1   | -0.9955 | 0.0151 |
| 653 | P56399 | Ubiquitin carboxyl-terminal hydrolase 5                                      | Usp5     | -0.9949 | 0.0151 |
| 654 | Q8K4J6 | Myocardin-related transcription factor A                                     | Mrtfa    | -0.9940 | 0.0152 |
| 655 | Q8CCJ4 | APC membrane recruitment protein 2                                           | Amer2    | -0.9940 | 0.0152 |
| 656 | Q3TX08 | tRNA (guanine(26)-N(2))-dimethyltransferase                                  | Trmt1    | -0.9940 | 0.0152 |
| 657 | B9EJ19 | Transmembrane protein 229A                                                   | Tmem229a | -0.9940 | 0.0152 |
| 658 | Q91WI7 | KICSTOR complex protein ITFG2                                                | Itfg2    | -0.9940 | 0.0152 |
| 659 | Q91WN1 | Dnaj homolog subfamily C member 9                                            | Dnajc9   | -0.9940 | 0.0152 |
| 660 | Q9D2X5 | MAU2 chromatid cohesion factor homolog                                       | Mau2     | -0.9940 | 0.0152 |
| 661 | Q9CQH7 | Transcription factor BTF3 homolog 4                                          | Btf3l4   | -0.9940 | 0.0152 |
| 662 | P58064 | 28S ribosomal protein S6 mitochondrial                                       | Mrps6    | -0.9940 | 0.0152 |
| 663 | Q6P5H6 | FERM domain-containing protein 5                                             | Frmf5    | -0.9940 | 0.0152 |
| 664 | Q9QYB8 | Beta-adducin                                                                 | Add2     | -0.9920 | 0.0153 |
| 665 | P35486 | Pyruvate dehydrogenase E1 component subunit alpha somatic form mitochondrial | Pdha1    | -0.9917 | 0.0153 |
| 666 | P84078 | ADP-ribosylation factor 1                                                    | Arf1     | -0.9902 | 0.0156 |
| 667 | Q58A65 | C-Jun-amino-terminal kinase-interacting protein 4                            | Spag9    | -0.9869 | 0.0171 |
| 668 | Q9Z2W8 | Glutamate receptor 4                                                         | Gria4    | -0.9862 | 0.0172 |
| 669 | Q01405 | Protein transport protein Sec23A                                             | Sec23a   | -0.9855 | 0.0172 |
| 670 | Q5EBJ4 | Ermin                                                                        | Ermin    | -0.9854 | 0.0172 |
| 671 | Q9R1P1 | Proteasome subunit beta type-3                                               | Psmb3    | -0.9854 | 0.0172 |
| 672 | Q9CZT8 | Ras-related protein Rab-3B                                                   | Rab3b    | -0.9850 | 0.0172 |
| 673 | Q3UFF7 | Lysophospholipase-like protein 1                                             | Lyplal1  | -0.9836 | 0.0175 |
| 674 | P11031 | Activated RNA polymerase II transcriptional coactivator p15                  | Sub1     | -0.9832 | 0.0175 |
| 675 | Q62393 | Tumor protein D52                                                            | Tpd52    | -0.9818 | 0.0175 |
| 676 | A2AN08 | E3 ubiquitin-protein ligase UBR4                                             | Ubr4     | -0.9805 | 0.0176 |
| 677 | Q91YL3 | Uridine-cytidine kinase-like 1                                               | Uckl1    | -0.9803 | 0.0176 |
| 678 | Q791T5 | Mitochondrial carrier homolog 1                                              | Mtch1    | -0.9764 | 0.0180 |
| 679 | Q8IZW4 | Copine-5                                                                     | Cpne5    | -0.9755 | 0.0180 |
| 680 | P98084 | Amyloid-beta A4 precursor protein-binding family A member 2                  | Appa2    | -0.9753 | 0.0181 |
| 681 | Q9CYW4 | Haloacid dehalogenase-like hydrolase domain-containing protein 3             | Hdhd3    | -0.9753 | 0.0181 |
| 682 | P61804 | Dolichyl-diphosphooligosaccharide--protein glycosyltransferase subunit DAD1  | Dad1     | -0.9753 | 0.0181 |
| 683 | P13020 | Gelsolin                                                                     | Gsn      | -0.9733 | 0.0182 |
| 684 | P97855 | Ras GTPase-activating protein-binding protein 1                              | G3bp1    | -0.9708 | 0.0183 |
| 685 | Q9D7A8 | Armado repeat-containing protein 1                                           | Armc1    | -0.9708 | 0.0183 |
| 686 | Q6ZPE2 | Myotubularin-related protein 5                                               | Sbf1     | -0.9697 | 0.0184 |
| 687 | O88844 | Isocitrate dehydrogenase [NADP] cytoplasmic                                  | Idh1     | -0.9688 | 0.0184 |
| 688 | Q99KC8 | von Willebrand factor A domain-containing protein 5A                         | Vwa5a    | -0.9665 | 0.0185 |
| 689 | P61205 | ADP-ribosylation factor 3                                                    | Arf3     | -0.9657 | 0.0186 |
| 690 | Q3UVL4 | Vacuolar protein sorting-associated protein 51 homolog                       | Vps51    | -0.9644 | 0.0186 |
| 691 | Q61097 | Kinase suppressor of Ras 1                                                   | Ksr1     | -0.9618 | 0.0188 |
| 692 | Q3UHX2 | 28 kDa heat- and acid-stable phosphoprotein                                  | Pdap1    | -0.9618 | 0.0188 |
| 693 | P97346 | Nucleoredoxin                                                                | Nxn      | -0.9611 | 0.0188 |
| 694 | E9PZJ8 | Activating signal cointegrator 1 complex subunit 3                           | Ascc3    | -0.9611 | 0.0188 |
| 695 | Q99LC8 | Translation initiation factor eIF-2B subunit alpha                           | Eif2b1   | -0.9606 | 0.0188 |
| 696 | Q8BI72 | CDKN2A-interacting protein                                                   | Cdkn2aip | -0.9598 | 0.0189 |
| 697 | Q9DCS2 | Methyltransferase-like 26                                                    | Mettl26  | -0.9598 | 0.0189 |
| 698 | Q8C460 | ERI1 exoribonuclease 3                                                       | Eri3     | -0.9598 | 0.0189 |
| 699 | Q8BQM8 | Echinoderm microtubule-associated protein-like 5                             | Emf5     | -0.9598 | 0.0189 |
| 700 | Q3THW5 | Histone H2A.V                                                                | H2az2    | -0.9596 | 0.0189 |
| 701 | POC056 | Histone H2A.Z                                                                | H2az1    | -0.9596 | 0.0189 |
| 702 | O88958 | Glucosamine-6-phosphate isomerase 1                                          | Gnpda1   | -0.9591 | 0.0189 |
| 703 | P29391 | Ferritin light chain 1                                                       | Ftl1     | -0.9589 | 0.0189 |
| 704 | Q8CHG7 | Rap guanine nucleotide exchange factor 2                                     | Rapgef2  | -0.9579 | 0.0191 |
| 705 | Q99KP3 | Lambda-crystallin homolog                                                    | Cryl1    | -0.9555 | 0.0194 |
| 706 | Q8VE47 | Ubiquitin-like modifier-activating enzyme 5                                  | Uba5     | -0.9555 | 0.0194 |
| 707 | O08579 | Emerin                                                                       | Emd      | -0.9555 | 0.0194 |
| 708 | Q9D1E6 | Tubulin-folding cofactor B                                                   | Tbcf     | -0.9476 | 0.0200 |
| 709 | Q810U3 | Neurofascin                                                                  | Nfasc    | -0.9465 | 0.0201 |

|     |        |                                                                     |                  |         |        |
|-----|--------|---------------------------------------------------------------------|------------------|---------|--------|
| 710 | P39054 | Dynamin-2                                                           | <i>Dnm2</i>      | -0.9464 | 0.0201 |
| 711 | Q7TQF7 | Amphiphysin                                                         | <i>Amph</i>      | -0.9460 | 0.0203 |
| 712 | P62878 | E3 ubiquitin-protein ligase RBX1                                    | <i>Rbx1</i>      | -0.9427 | 0.0204 |
| 713 | P69566 | Ran-binding protein 9                                               | <i>Ranbp9</i>    | -0.9395 | 0.0205 |
| 714 | Q80X14 | Phosphatidylinositol 5-phosphate 4-kinase type-2 beta               | <i>Pip4k2b</i>   | -0.9392 | 0.0205 |
| 715 | O08638 | Myosin-11                                                           | <i>Myh11</i>     | -0.9392 | 0.0205 |
| 716 | Q61595 | Kinectin                                                            | <i>Ktn1</i>      | -0.9387 | 0.0206 |
| 717 | Q99KI3 | ER membrane protein complex subunit 3                               | <i>Emc3</i>      | -0.9387 | 0.0206 |
| 718 | Q8R2H9 | Phosphoethanolamine/phosphocholine phosphatase                      | <i>Phospha1</i>  | -0.9387 | 0.0206 |
| 719 | P02088 | Hemoglobin subunit beta-1                                           | <i>Hbb-b1</i>    | -0.9374 | 0.0207 |
| 720 | Q8VEJ9 | Vacuolar protein sorting-associated protein 4A                      | <i>Vps4a</i>     | -0.9367 | 0.0208 |
| 721 | O70252 | Heme oxygenase 2                                                    | <i>Hmox2</i>     | -0.9364 | 0.0208 |
| 722 | Q920P5 | Adenylate kinase isoenzyme 5                                        | <i>Ak5</i>       | -0.9363 | 0.0208 |
| 723 | P35288 | Ras-related protein Rab-23                                          | <i>Rab23</i>     | -0.9347 | 0.0210 |
| 724 | P62996 | Transformer-2 protein homolog beta                                  | <i>Tra2b</i>     | -0.9341 | 0.0210 |
| 725 | Q99JY8 | Phospholipid phosphatase 3                                          | <i>Plpp3</i>     | -0.9334 | 0.0210 |
| 726 | O70492 | Sorting nexin-3                                                     | <i>Snx3</i>      | -0.9321 | 0.0211 |
| 727 | Q924M7 | Mannose-6-phosphate isomerase                                       | <i>Mpi</i>       | -0.9315 | 0.0211 |
| 728 | P63163 | Small nuclear ribonucleoprotein-associated protein N                | <i>Snrpn</i>     | -0.9315 | 0.0211 |
| 729 | P55066 | Neurocan core protein                                               | <i>Ncan</i>      | -0.9303 | 0.0212 |
| 730 | P08226 | Apolipoprotein E                                                    | <i>ApoE</i>      | -0.9303 | 0.0212 |
| 731 | P22682 | E3 ubiquitin-protein ligase CBL                                     | <i>Cbl</i>       | -0.9293 | 0.0213 |
| 732 | Q9D855 | Cytochrome b-c1 complex subunit 7                                   | <i>Uqcrb</i>     | -0.9279 | 0.0214 |
| 733 | Q6PGN3 | Serine/threonine-protein kinase DCLK2                               | <i>Dclk2</i>     | -0.9277 | 0.0214 |
| 734 | Q8BP48 | Methionine aminopeptidase 1                                         | <i>Metap1</i>    | -0.9240 | 0.0216 |
| 735 | P21550 | Beta-enolase                                                        | <i>Eno3</i>      | -0.9188 | 0.0220 |
| 736 | Q8BH04 | Phosphoenolpyruvate carboxykinase [GTP] mitochondrial               | <i>Pck2</i>      | -0.9180 | 0.0220 |
| 737 | P60487 | Chronophin                                                          | <i>Pdxp</i>      | -0.9173 | 0.0221 |
| 738 | P01636 | Ig kappa chain V-V region MOPC 149                                  |                  | -0.9170 | 0.0221 |
| 739 | O54692 | Centromere/kinetochore protein zw10 homolog                         | <i>Zw10</i>      | -0.9170 | 0.0221 |
| 740 | Q8BVI5 | Syntaxin-16                                                         | <i>Stx16</i>     | -0.9170 | 0.0221 |
| 741 | Q8BG94 | COMM domain-containing protein 7                                    | <i>Comm7</i>     | -0.9170 | 0.0221 |
| 742 | Q9ER35 | Fructosamine-3-kinase                                               | <i>Fn3k</i>      | -0.9165 | 0.0221 |
| 743 | Q99LX0 | Parkinson disease protein 7 homolog                                 | <i>Park7</i>     | -0.9140 | 0.0223 |
| 744 | P60521 | Gamma-aminobutyric acid receptor-associated protein-like 2          | <i>Gabarapl2</i> | -0.9108 | 0.0225 |
| 745 | P50518 | V-type proton ATPase subunit E 1                                    | <i>Atp6v1e1</i>  | -0.9105 | 0.0225 |
| 746 | P61290 | Proteasome activator complex subunit 3                              | <i>Psme3</i>     | -0.9095 | 0.0225 |
| 747 | Q9WTL7 | Acyl-protein thioesterase 2                                         | <i>Lypla2</i>    | -0.9095 | 0.0225 |
| 748 | P03899 | NADH-ubiquinone oxidoreductase chain 3                              | <i>Mtnd3</i>     | -0.9087 | 0.0226 |
| 749 | Q8BYK4 | Retinol dehydrogenase 12                                            | <i>Rdh12</i>     | -0.9075 | 0.0229 |
| 750 | Q61792 | LIM and SH3 domain protein 1                                        | <i>Lasp1</i>     | -0.9030 | 0.0233 |
| 751 | Q8K2X3 | CST complex subunit STN1                                            | <i>Stn1</i>      | -0.9026 | 0.0233 |
| 752 | Q9DBR1 | 5'-3' exoribonuclease 2                                             | <i>Xrn2</i>      | -0.9001 | 0.0236 |
| 753 | Q8BLN5 | Lanosterol synthase                                                 | <i>Lss</i>       | -0.8997 | 0.0236 |
| 754 | O88738 | Baculoviral IAP repeat-containing protein 6                         | <i>Birc6</i>     | -0.8991 | 0.0237 |
| 755 | Q8CFV4 | Neuritin                                                            | <i>Nrn1</i>      | -0.8985 | 0.0237 |
| 756 | Q80U09 | Membrane-associated progesterone receptor component 2               | <i>Pgrmc2</i>    | -0.8971 | 0.0241 |
| 757 | Q8BIZ1 | Ankyrin repeat and sterile alpha motif domain-containing protein 1B | <i>Anks1b</i>    | -0.8966 | 0.0241 |
| 758 | Q61147 | Ceruloplasmin                                                       | <i>Cp</i>        | -0.8959 | 0.0242 |
| 759 | P67984 | 60S ribosomal protein L22                                           | <i>Rpl22</i>     | -0.8921 | 0.0254 |
| 760 | Q8BGB7 | Enolase-phosphatase E1                                              | <i>Enoph1</i>    | -0.8909 | 0.0257 |
| 761 | P35505 | Fumarylacetoacetase                                                 | <i>Fah</i>       | -0.8908 | 0.0257 |
| 762 | Q8VEM8 | Phosphate carrier protein mitochondrial                             | <i>Slc25a3</i>   | -0.8895 | 0.0258 |
| 763 | Q3UH99 | Protein shisa-6                                                     | <i>Shisa6</i>    | -0.8894 | 0.0258 |
| 764 | O70589 | Peripheral plasma membrane protein CASK                             | <i>Cask</i>      | -0.8889 | 0.0259 |
| 765 | Q9CQA1 | Trafficking protein particle complex subunit 5                      | <i>Trappc5</i>   | -0.8880 | 0.0259 |
| 766 | Q8BFR4 | N-acetylglucosamine-6-sulfatase                                     | <i>Gns</i>       | -0.8880 | 0.0259 |
| 767 | Q9D1N9 | 39S ribosomal protein L21 mitochondrial                             | <i>Mrlp21</i>    | -0.8880 | 0.0259 |
| 768 | P63011 | Ras-related protein Rab-3A                                          | <i>Rab3a</i>     | -0.8879 | 0.0259 |
| 769 | P35283 | Ras-related protein Rab-12                                          | <i>Rab12</i>     | -0.8865 | 0.0265 |
| 770 | P70349 | Histidine triad nucleotide-binding protein 1                        | <i>Hint1</i>     | -0.8860 | 0.0265 |
| 771 | Q8BF29 | Erlin-2                                                             | <i>Erlin2</i>    | -0.8848 | 0.0266 |
| 772 | O88322 | Nidogen-2                                                           | <i>Nid2</i>      | -0.8848 | 0.0266 |
| 773 | P97412 | Lysosomal-trafficking regulator                                     | <i>Lyst</i>      | -0.8843 | 0.0266 |
| 774 | Q9CYR0 | Single-stranded DNA-binding protein mitochondrial                   | <i>Ssbp1</i>     | -0.8825 | 0.0267 |
| 775 | O09117 | Synaptophysin-like protein 1                                        | <i>Syp1</i>      | -0.8788 | 0.0269 |
| 776 | P45376 | Aldo-keto reductase family 1 member B1                              | <i>Akr1b1</i>    | -0.8781 | 0.0270 |
| 777 | O08583 | THO complex subunit 4                                               | <i>Alyref</i>    | -0.8778 | 0.0270 |
| 778 | Q6NVE9 | Protein phosphatase PTC7 homolog                                    | <i>Pptc7</i>     | -0.8743 | 0.0271 |
| 779 | Q810B7 | SLIT and NTRK-like protein 5                                        | <i>Slitrk5</i>   | -0.8725 | 0.0272 |
| 780 | P19001 | Keratin type I cytoskeletal 19                                      | <i>Krt19</i>     | -0.8724 | 0.0273 |
| 781 | P54797 | Transport and Golgi organization 2 homolog                          | <i>Tango2</i>    | -0.8709 | 0.0274 |
| 782 | Q8K1R7 | Serine/threonine-protein kinase Nek9                                | <i>Nek9</i>      | -0.8706 | 0.0274 |
| 783 | P49722 | Proteasome subunit alpha type-2                                     | <i>Psm2a</i>     | -0.8706 | 0.0274 |
| 784 | P97433 | Rho guanine nucleotide exchange factor 28                           | <i>Arhgef28</i>  | -0.8706 | 0.0274 |
| 785 | P08071 | Lactotransferrin                                                    | <i>Ltf</i>       | -0.8706 | 0.0274 |
| 786 | Q9J175 | Ribosylidihydroxynicotinamide dehydrogenase [quinone]               | <i>Nqo2</i>      | -0.8706 | 0.0274 |
| 787 | P97470 | Serine/threonine-protein phosphatase 4 catalytic subunit            | <i>Ppp4c</i>     | -0.8705 | 0.0274 |
| 788 | Q922Q8 | Leucine-rich repeat-containing protein 59                           | <i>Lrrc59</i>    | -0.8705 | 0.0274 |

|     |        |                                                             |                 |         |        |
|-----|--------|-------------------------------------------------------------|-----------------|---------|--------|
| 789 | Q922J6 | Tetraspanin-2                                               | <i>Tspan2</i>   | -0.8705 | 0.0274 |
| 790 | Q9QY42 | Prosaposin receptor GPR37                                   | <i>Gpr37</i>    | -0.8700 | 0.0274 |
| 791 | Q9DCU6 | 39S ribosomal protein L4 mitochondrial                      | <i>Mrpl4</i>    | -0.8700 | 0.0274 |
| 792 | P46467 | Vacuolar protein sorting-associated protein 4B              | <i>Vps4b</i>    | -0.8669 | 0.0276 |
| 793 | Q9CRB9 | MIC complex subunit Mic19                                   | <i>Chchd3</i>   | -0.8666 | 0.0276 |
| 794 | Q91YP2 | Neurolysin mitochondrial                                    | <i>Nln</i>      | -0.8659 | 0.0277 |
| 795 | Q9CQJ8 | NADH dehydrogenase [ubiquinone] 1 beta subcomplex subunit 9 | <i>Ndufb9</i>   | -0.8659 | 0.0277 |
| 796 | Q8K4I3 | Rho guanine nucleotide exchange factor 6                    | <i>Arhgef6</i>  | -0.8640 | 0.0281 |
| 797 | Q60610 | Rho guanine nucleotide exchange factor TIAM1                | <i>Tiam1</i>    | -0.8640 | 0.0281 |
| 798 | P21460 | Cystatin-C                                                  | <i>Cst3</i>     | -0.8635 | 0.0281 |
| 799 | Q9JM63 | ATP-sensitive inward rectifier potassium channel 10         | <i>Kcnj10</i>   | -0.8628 | 0.0281 |
| 800 | Q9JMG7 | Hepatoma-derived growth factor-related protein 3            | <i>Hdgf3</i>    | -0.8623 | 0.0281 |
| 801 | Q99J16 | Ras-related protein Rap-1b                                  | <i>Rap1b</i>    | -0.8620 | 0.0282 |
| 802 | Q8VHL0 | Urea transporter 1                                          | <i>Slc14a1</i>  | -0.8610 | 0.0282 |
| 803 | Q3THE2 | Myosin regulatory light chain 12B                           | <i>Myl12b</i>   | -0.8607 | 0.0282 |
| 804 | Q6PDY2 | 2-aminoethanethiol dioxygenase                              | <i>Ado</i>      | -0.8571 | 0.0285 |
| 805 | Q6GYP7 | Ral GTPase-activating protein subunit alpha-1               | <i>Ralgapa1</i> | -0.8568 | 0.0287 |
| 806 | Q8C522 | Endonuclease domain-containing 1 protein                    | <i>Endod1</i>   | -0.8562 | 0.0287 |
| 807 | Q7TQD2 | Tubulin polymerization-promoting protein                    | <i>Tppp</i>     | -0.8558 | 0.0287 |
| 808 | P23591 | GDP-L-fucose synthase                                       | <i>Gfus</i>     | -0.8527 | 0.0290 |
| 809 | P00920 | Carbonic anhydrase 2                                        | <i>Ca2</i>      | -0.8527 | 0.0290 |
| 810 | O70493 | Sorting nexin-12                                            | <i>Snx12</i>    | -0.8527 | 0.0290 |
| 811 | Q62348 | Translin                                                    | <i>Tsn</i>      | -0.8520 | 0.0292 |
| 812 | Q925T6 | Glutamate receptor-interacting protein 1                    | <i>Grip1</i>    | -0.8520 | 0.0292 |
| 813 | Q8BK08 | Transmembrane protein 11 mitochondrial                      | <i>Tmem11</i>   | -0.8520 | 0.0292 |
| 814 | Q8BMF3 | NADP-dependent malic enzyme mitochondrial                   | <i>Me3</i>      | -0.8505 | 0.0293 |
| 815 | Q91V24 | ATP-binding cassette sub-family A member 7                  | <i>Abca7</i>    | -0.8495 | 0.0295 |
| 816 | P17710 | Hexokinase-1                                                | <i>Hk1</i>      | -0.8486 | 0.0296 |
| 817 | Q9WVA4 | Transgelin-2                                                | <i>Tagln2</i>   | -0.8470 | 0.0298 |
| 818 | Q91YH5 | Atlastin-3                                                  | <i>Atl3</i>     | -0.8447 | 0.0299 |
| 819 | Q61772 | Ephrin type-A receptor 7                                    | <i>Epha7</i>    | -0.8445 | 0.0299 |
| 820 | Q8BH59 | Calcium-binding mitochondrial carrier protein Aralar1       | <i>Slc25a12</i> | -0.8441 | 0.0299 |
| 821 | Q8BH74 | Nuclear pore complex protein Nup107                         | <i>Nup107</i>   | -0.8435 | 0.0300 |
| 822 | Q8C0Z1 | Protein FAM234A                                             | <i>Fam234a</i>  | -0.8435 | 0.0300 |
| 823 | Q8BGR2 | Volume-regulated anion channel subunit LRRC8D               | <i>Lrrc8d</i>   | -0.8435 | 0.0300 |
| 824 | P84099 | 60S ribosomal protein L19                                   | <i>Rpl19</i>    | -0.8435 | 0.0300 |
| 825 | Q9CYH5 | Glucose-fructose oxidoreductase domain-containing protein 2 | <i>Gfod2</i>    | -0.8435 | 0.0300 |
| 826 | Q6P4S8 | Integrator complex subunit 1                                | <i>Ints1</i>    | -0.8435 | 0.0300 |
| 827 | Q8BGS7 | Choline/ethanolaminephosphotransferase 1                    | <i>Cept1</i>    | -0.8435 | 0.0300 |
| 828 | O55126 | Protein NipSnap homolog 2                                   | <i>Nipsnap2</i> | -0.8434 | 0.0300 |
| 829 | O70433 | Four and a half LIM domains protein 2                       | <i>Fhl2</i>     | -0.8434 | 0.0300 |
| 830 | Q6ZQ82 | Rho GTPase-activating protein 26                            | <i>Arhgap26</i> | -0.8434 | 0.0300 |
| 831 | Q8BFZ3 | Beta-actin-like protein 2                                   | <i>Actbl2</i>   | -0.6308 | 0.0812 |
| 832 | P62737 | Actin aortic smooth muscle                                  | <i>Acta2</i>    | -0.5124 | 0.1249 |
