# Supplementary material for: Hippocampal dentate gyri proteomics reveals Wnt signaling involvement in the behavioral impairment in the THRSP-overexpressing ADHD mouse model
Source: PubMed Central journal article supplement (PMC9842619; doi:10.1038/s42003-022-04387-5), 2023-01-16
Supplement: 42003_2022_4387_MOESM2_ESM.pdf [file 42003_2022_4387_MOESM2_ESM.pdf]

## **Description of Additional Supplementary Files**

File Name: Supplementary Video 1

Description: Sample mouse treadmill experiment
